# Supplementary material for: Host–guest systems for the SAMPL9 blinded prediction challenge: phenothiazine as a privileged scaffold for binding to cyclodextrins
Source: Royal Society of Chemistry journal article supplement (doi:10.1039/d3cp05347d), 2023-12-13

# Structure-Binding Relationship of Permethylyated Cyclodextrins and Phenothiazine Drugs

Skaggs School of Pharmacy and Pharmaceutical Sciences, University of California, San Diego, 9500 Gilman Drive, La Jolla, California 92093-0751, USA

\*[mgilson@health.ucsd.edu](mailto:mgilson@health.ucsd.edu)

# $^1\text{H}$ NMR of Phenothiazine Compounds

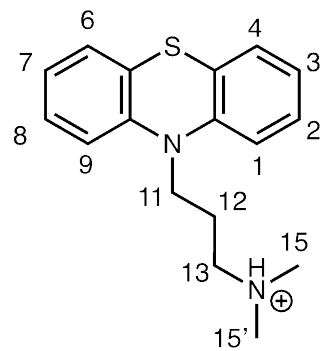

PMZ

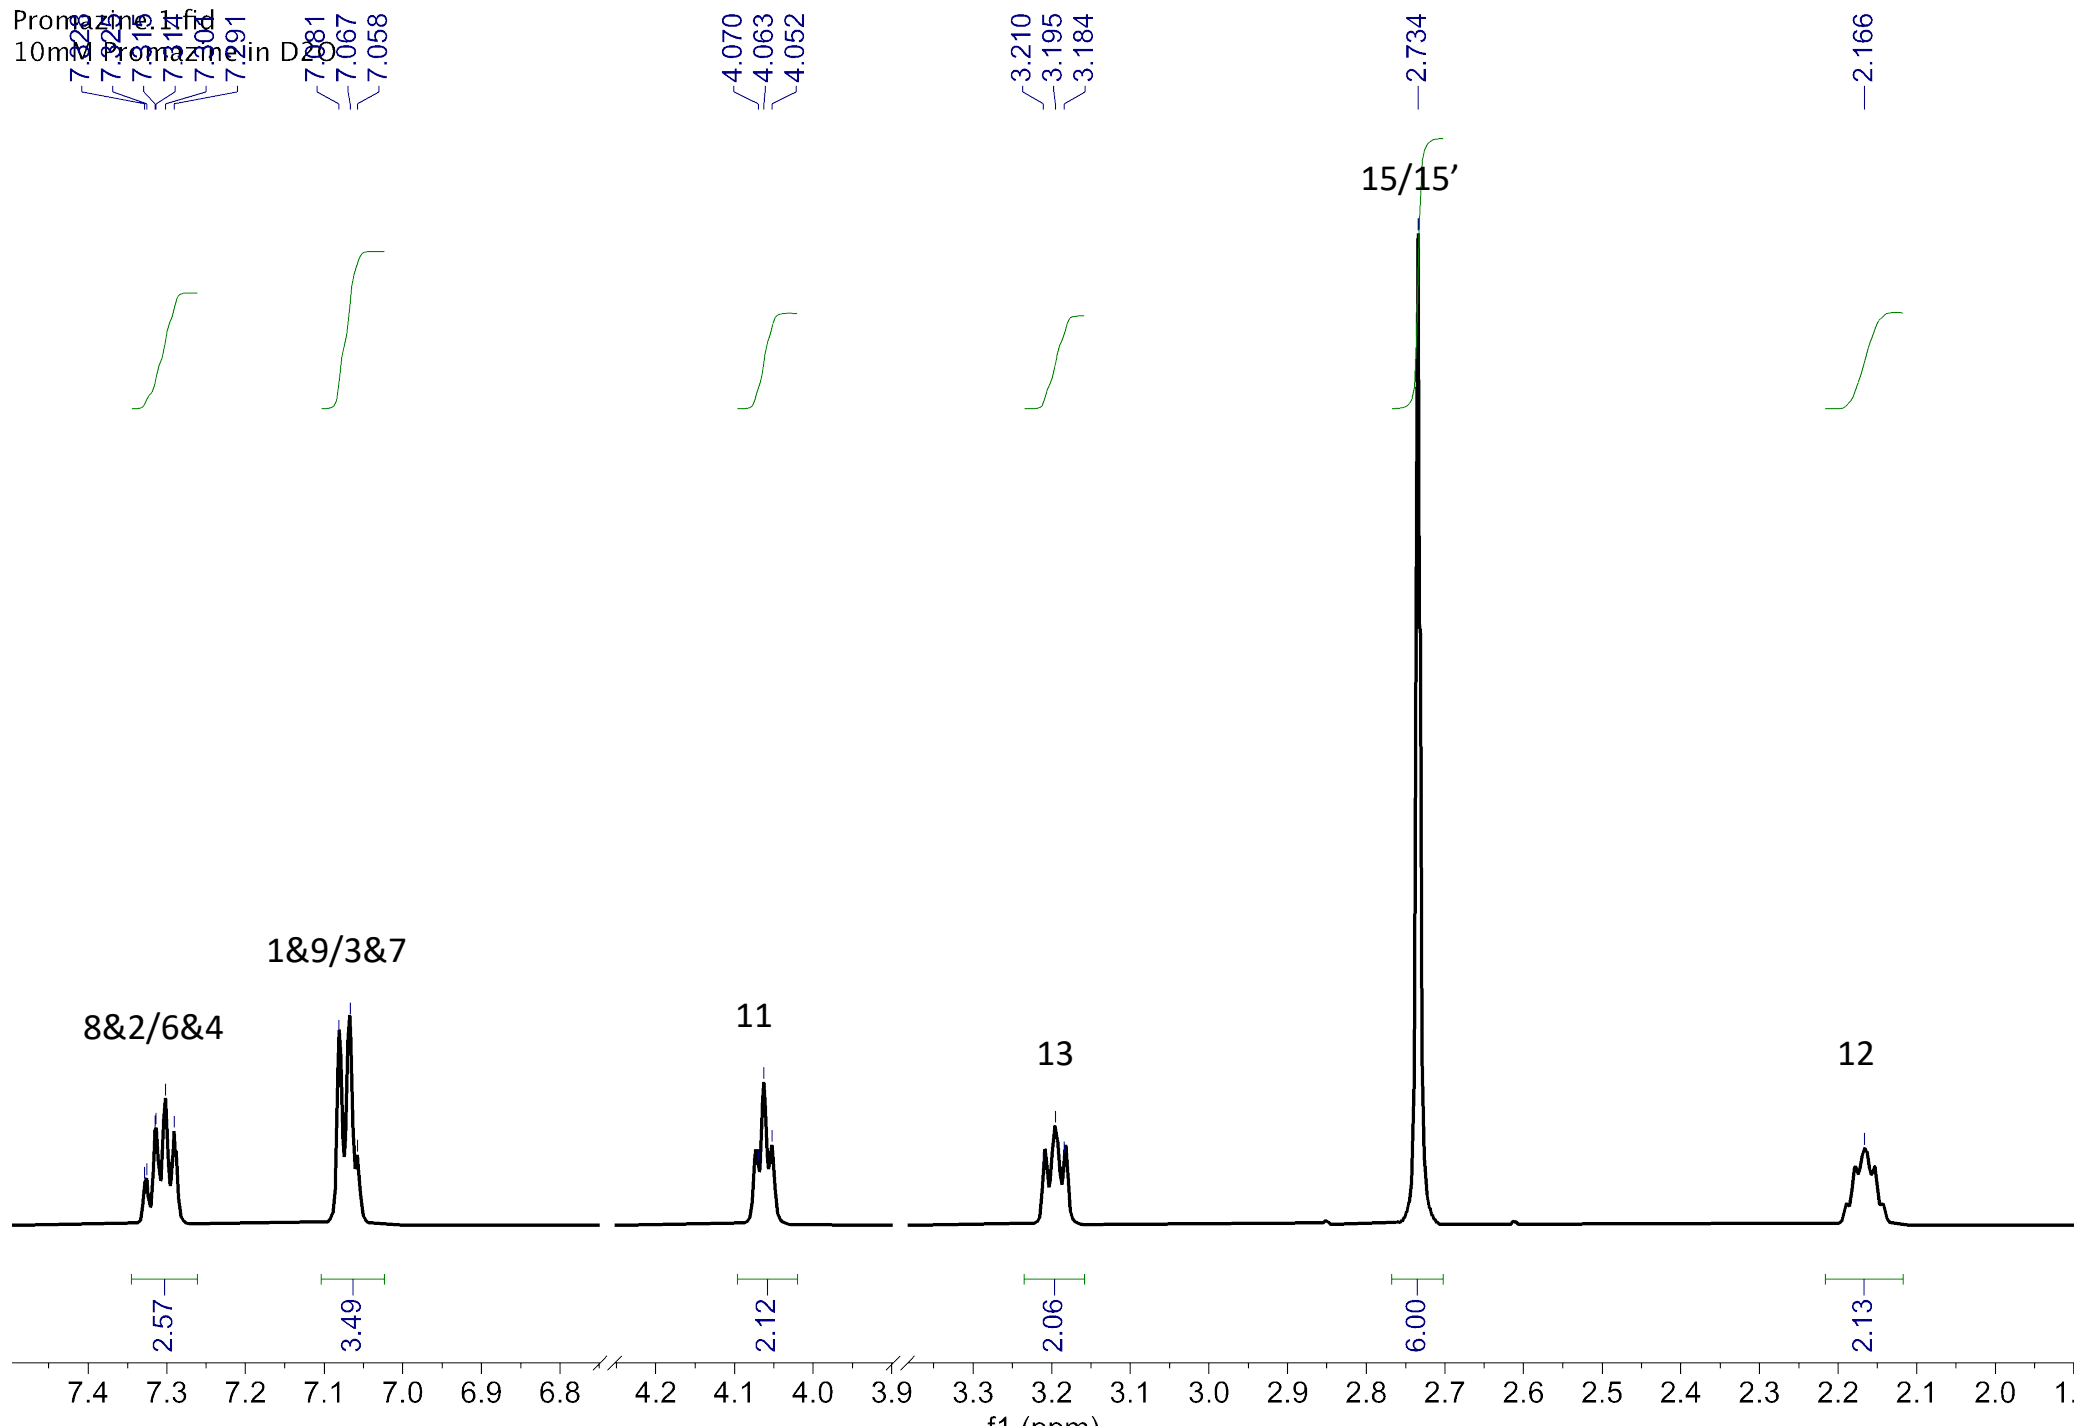

promethazine-1.fid  
10mM Promethazine in D2O

7.396  
7.391  
7.386  
7.381  
7.114  
7.101  
7.089  
7.061  
7.049  
4.308  
4.292  
4.282  
4.266  
4.072  
4.046  
3.922  
2.756  
1.422  
1.417  
1.410  
1.406

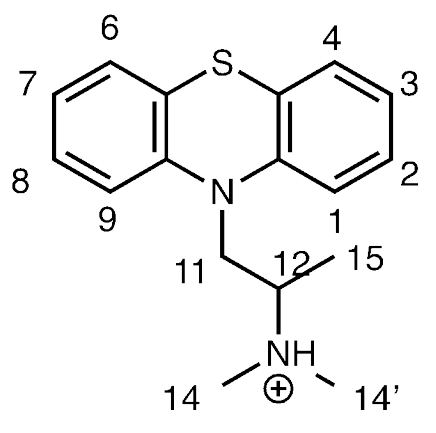

PMT

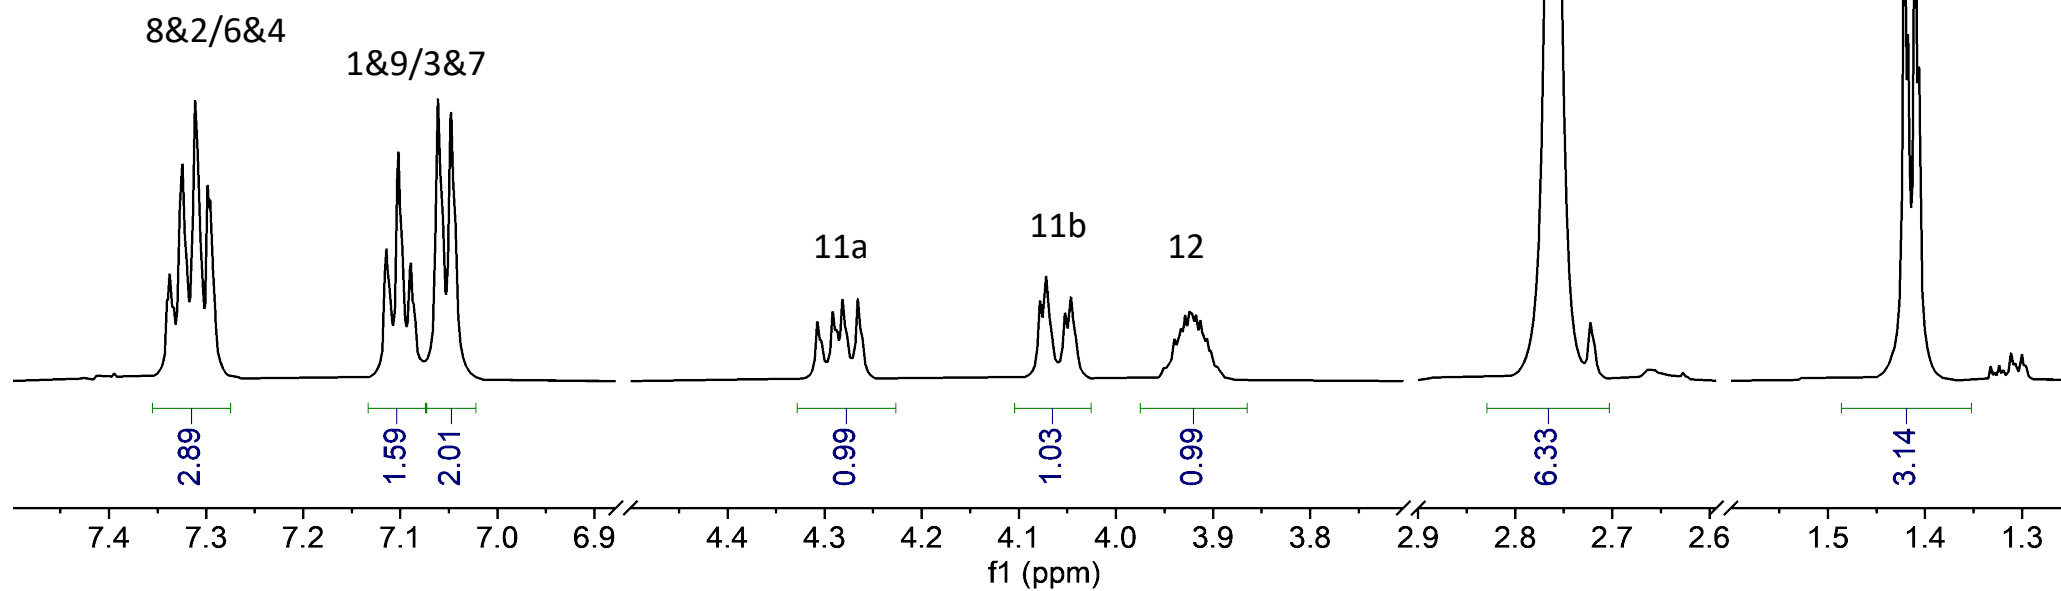

Chlorpromazine d<sub>5</sub>-<sup>15</sup>DFD  
10mM Chlorpromazine in D<sub>2</sub>O

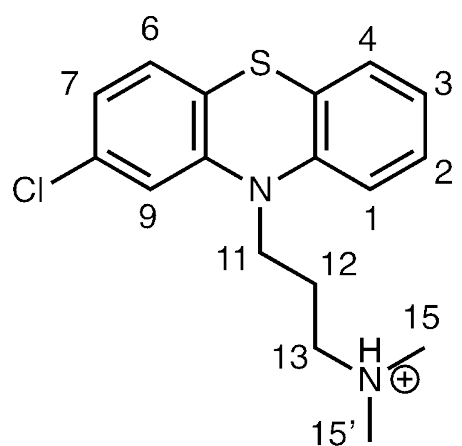

CPZ

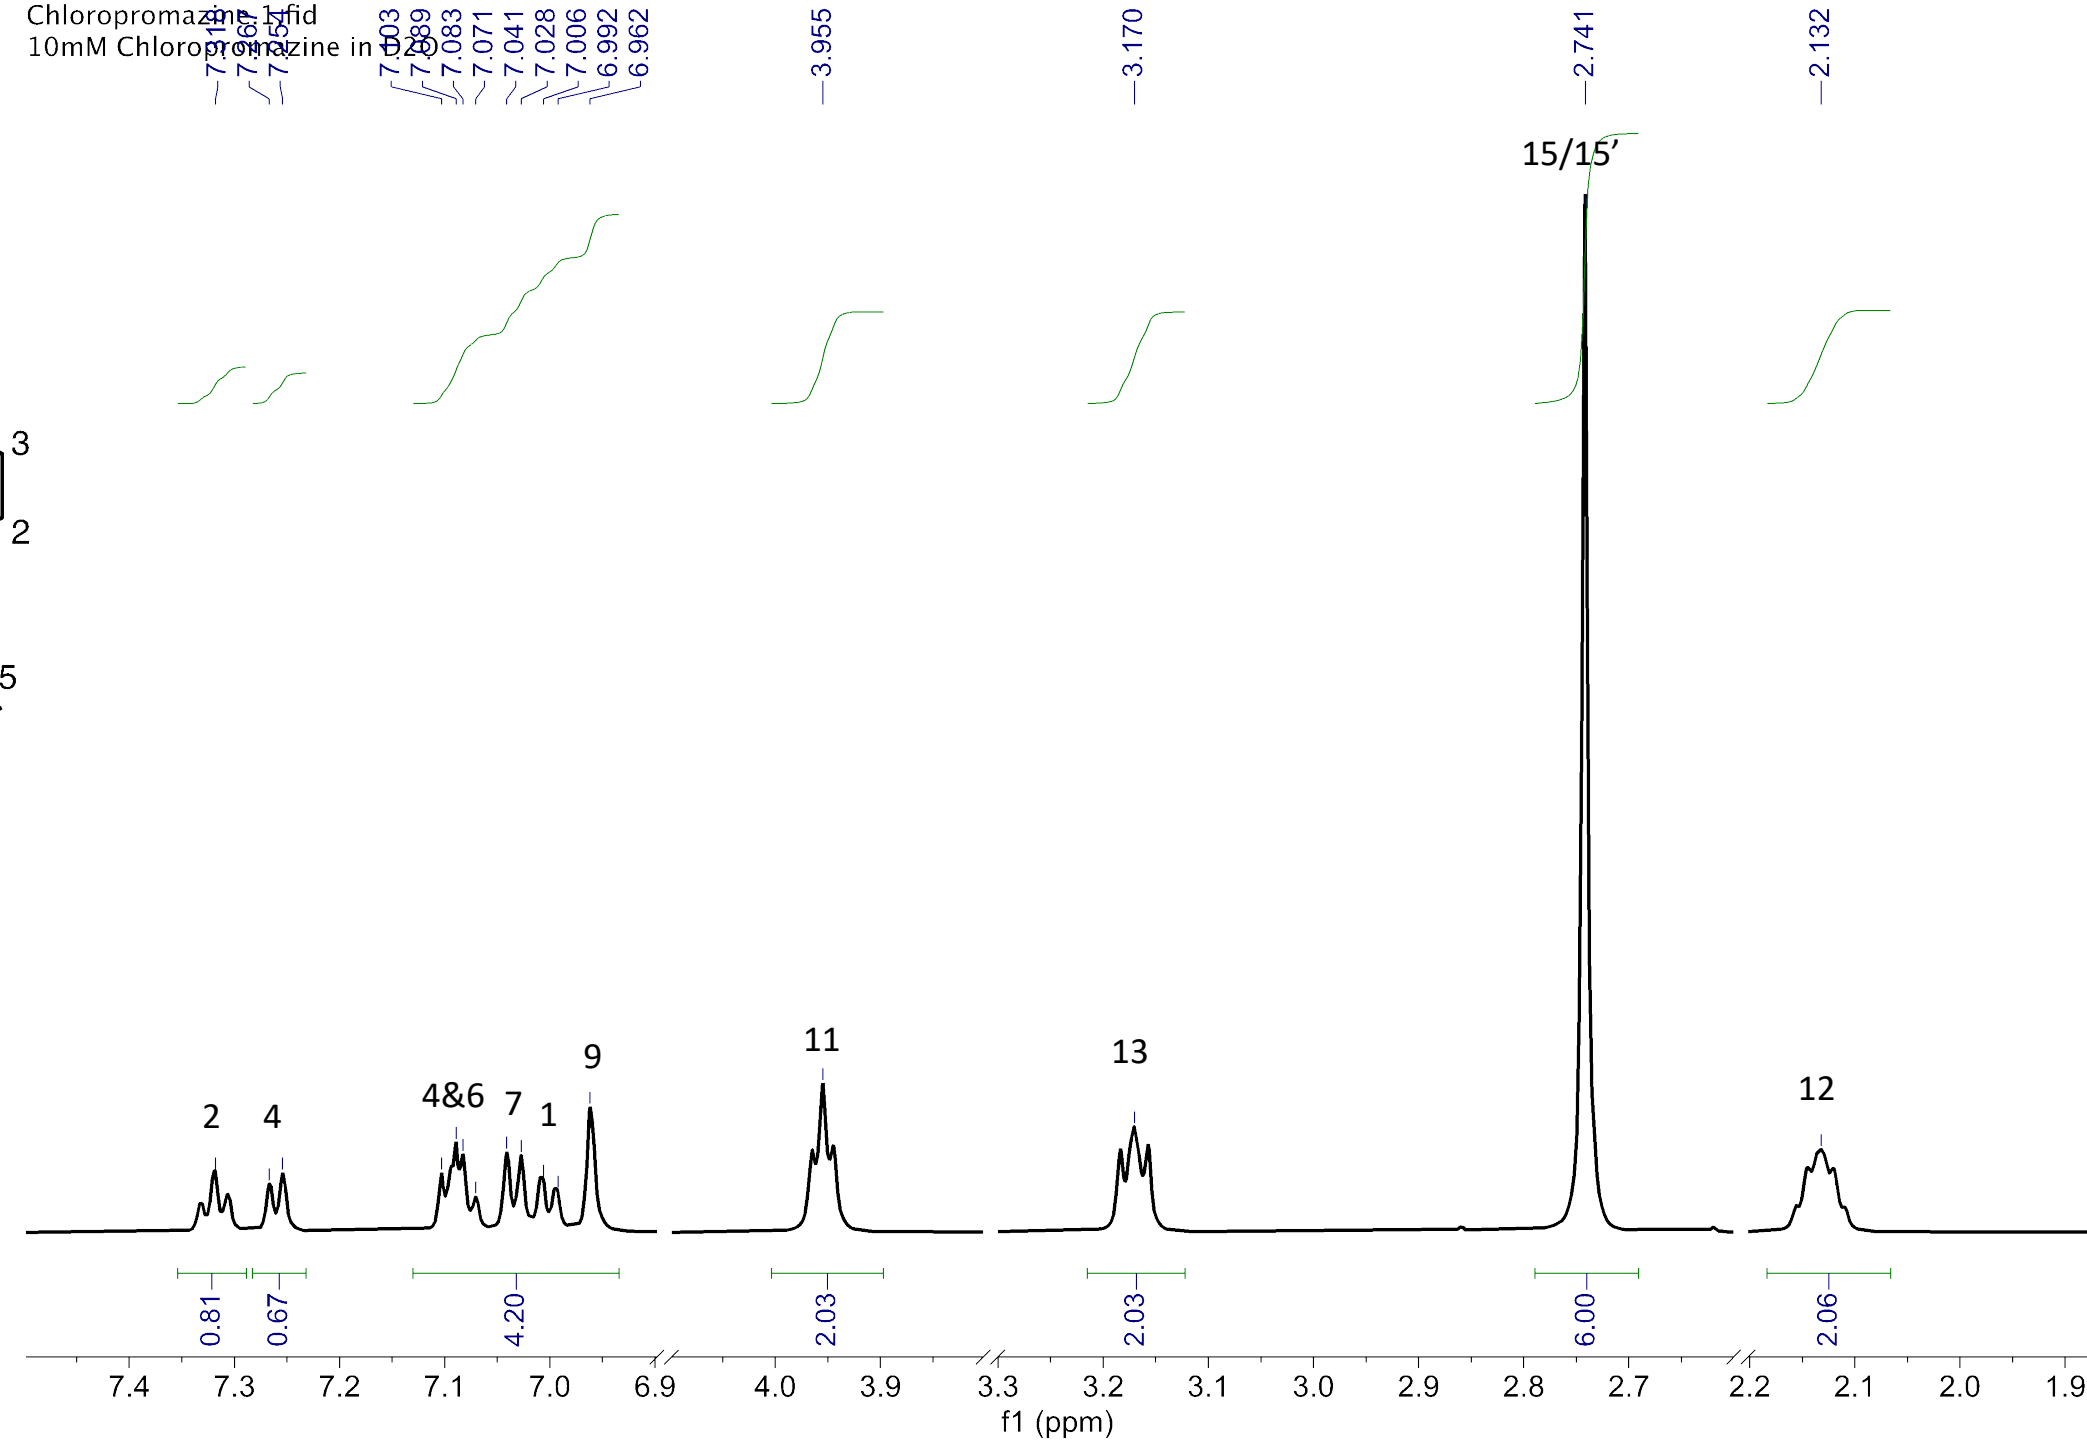

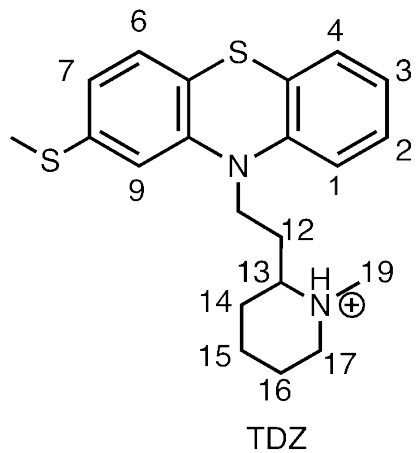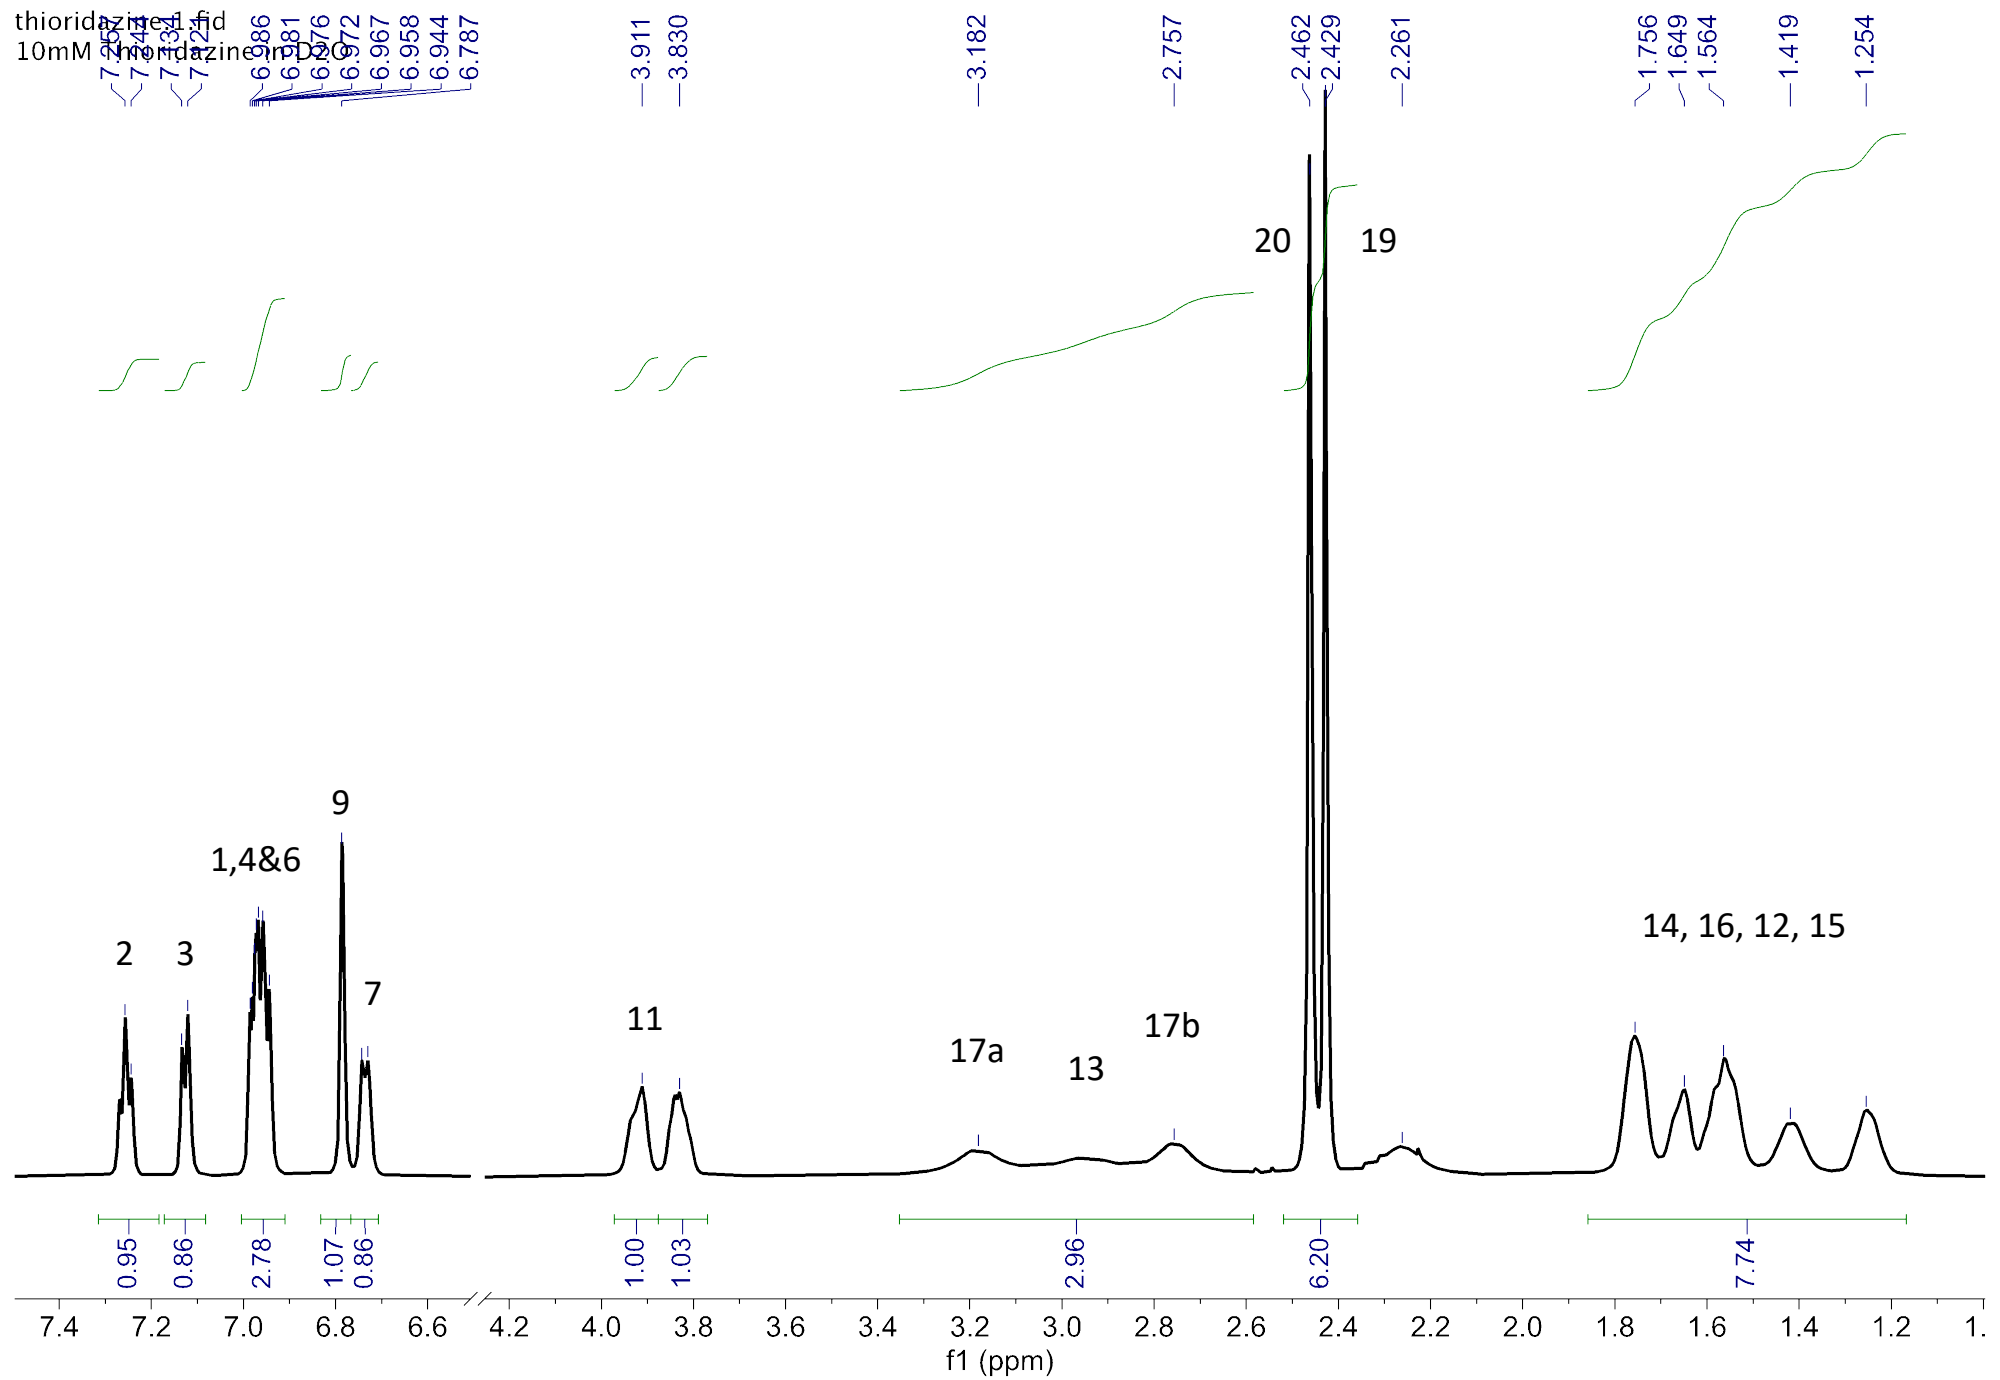

Trifluoperazine d<sub>1</sub> f1  
10mM Trifluoperazine in D<sub>2</sub>O

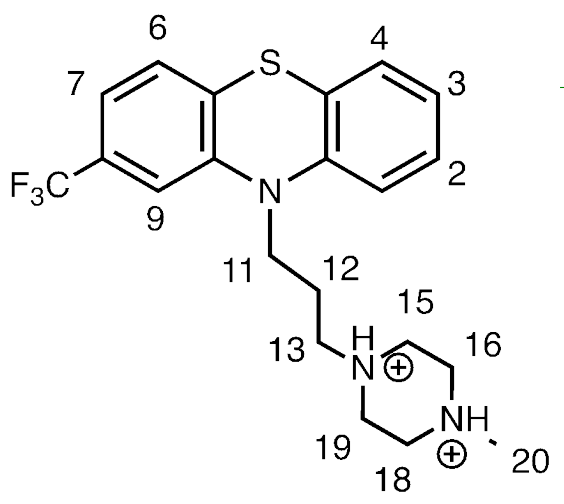

TFP

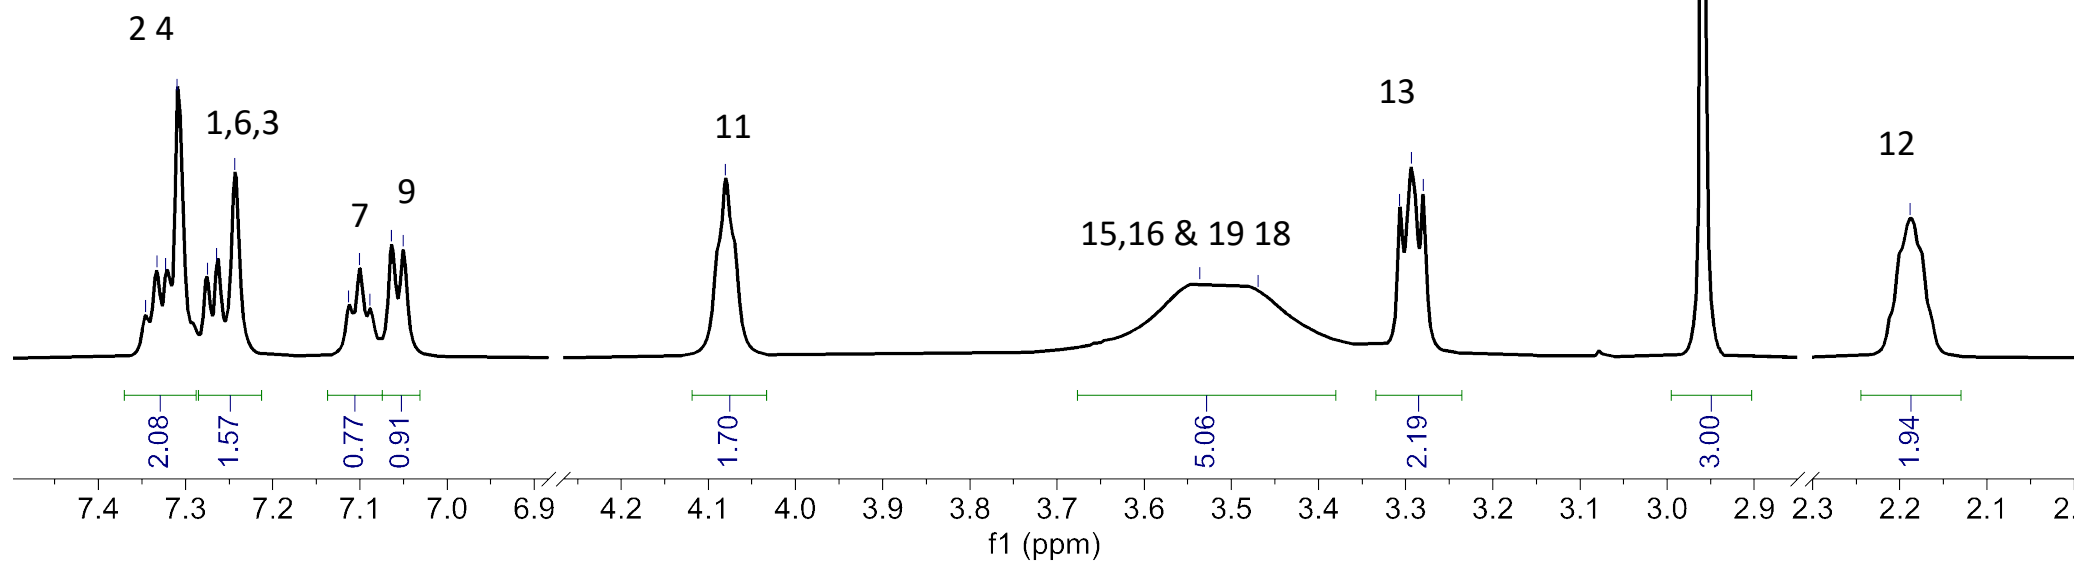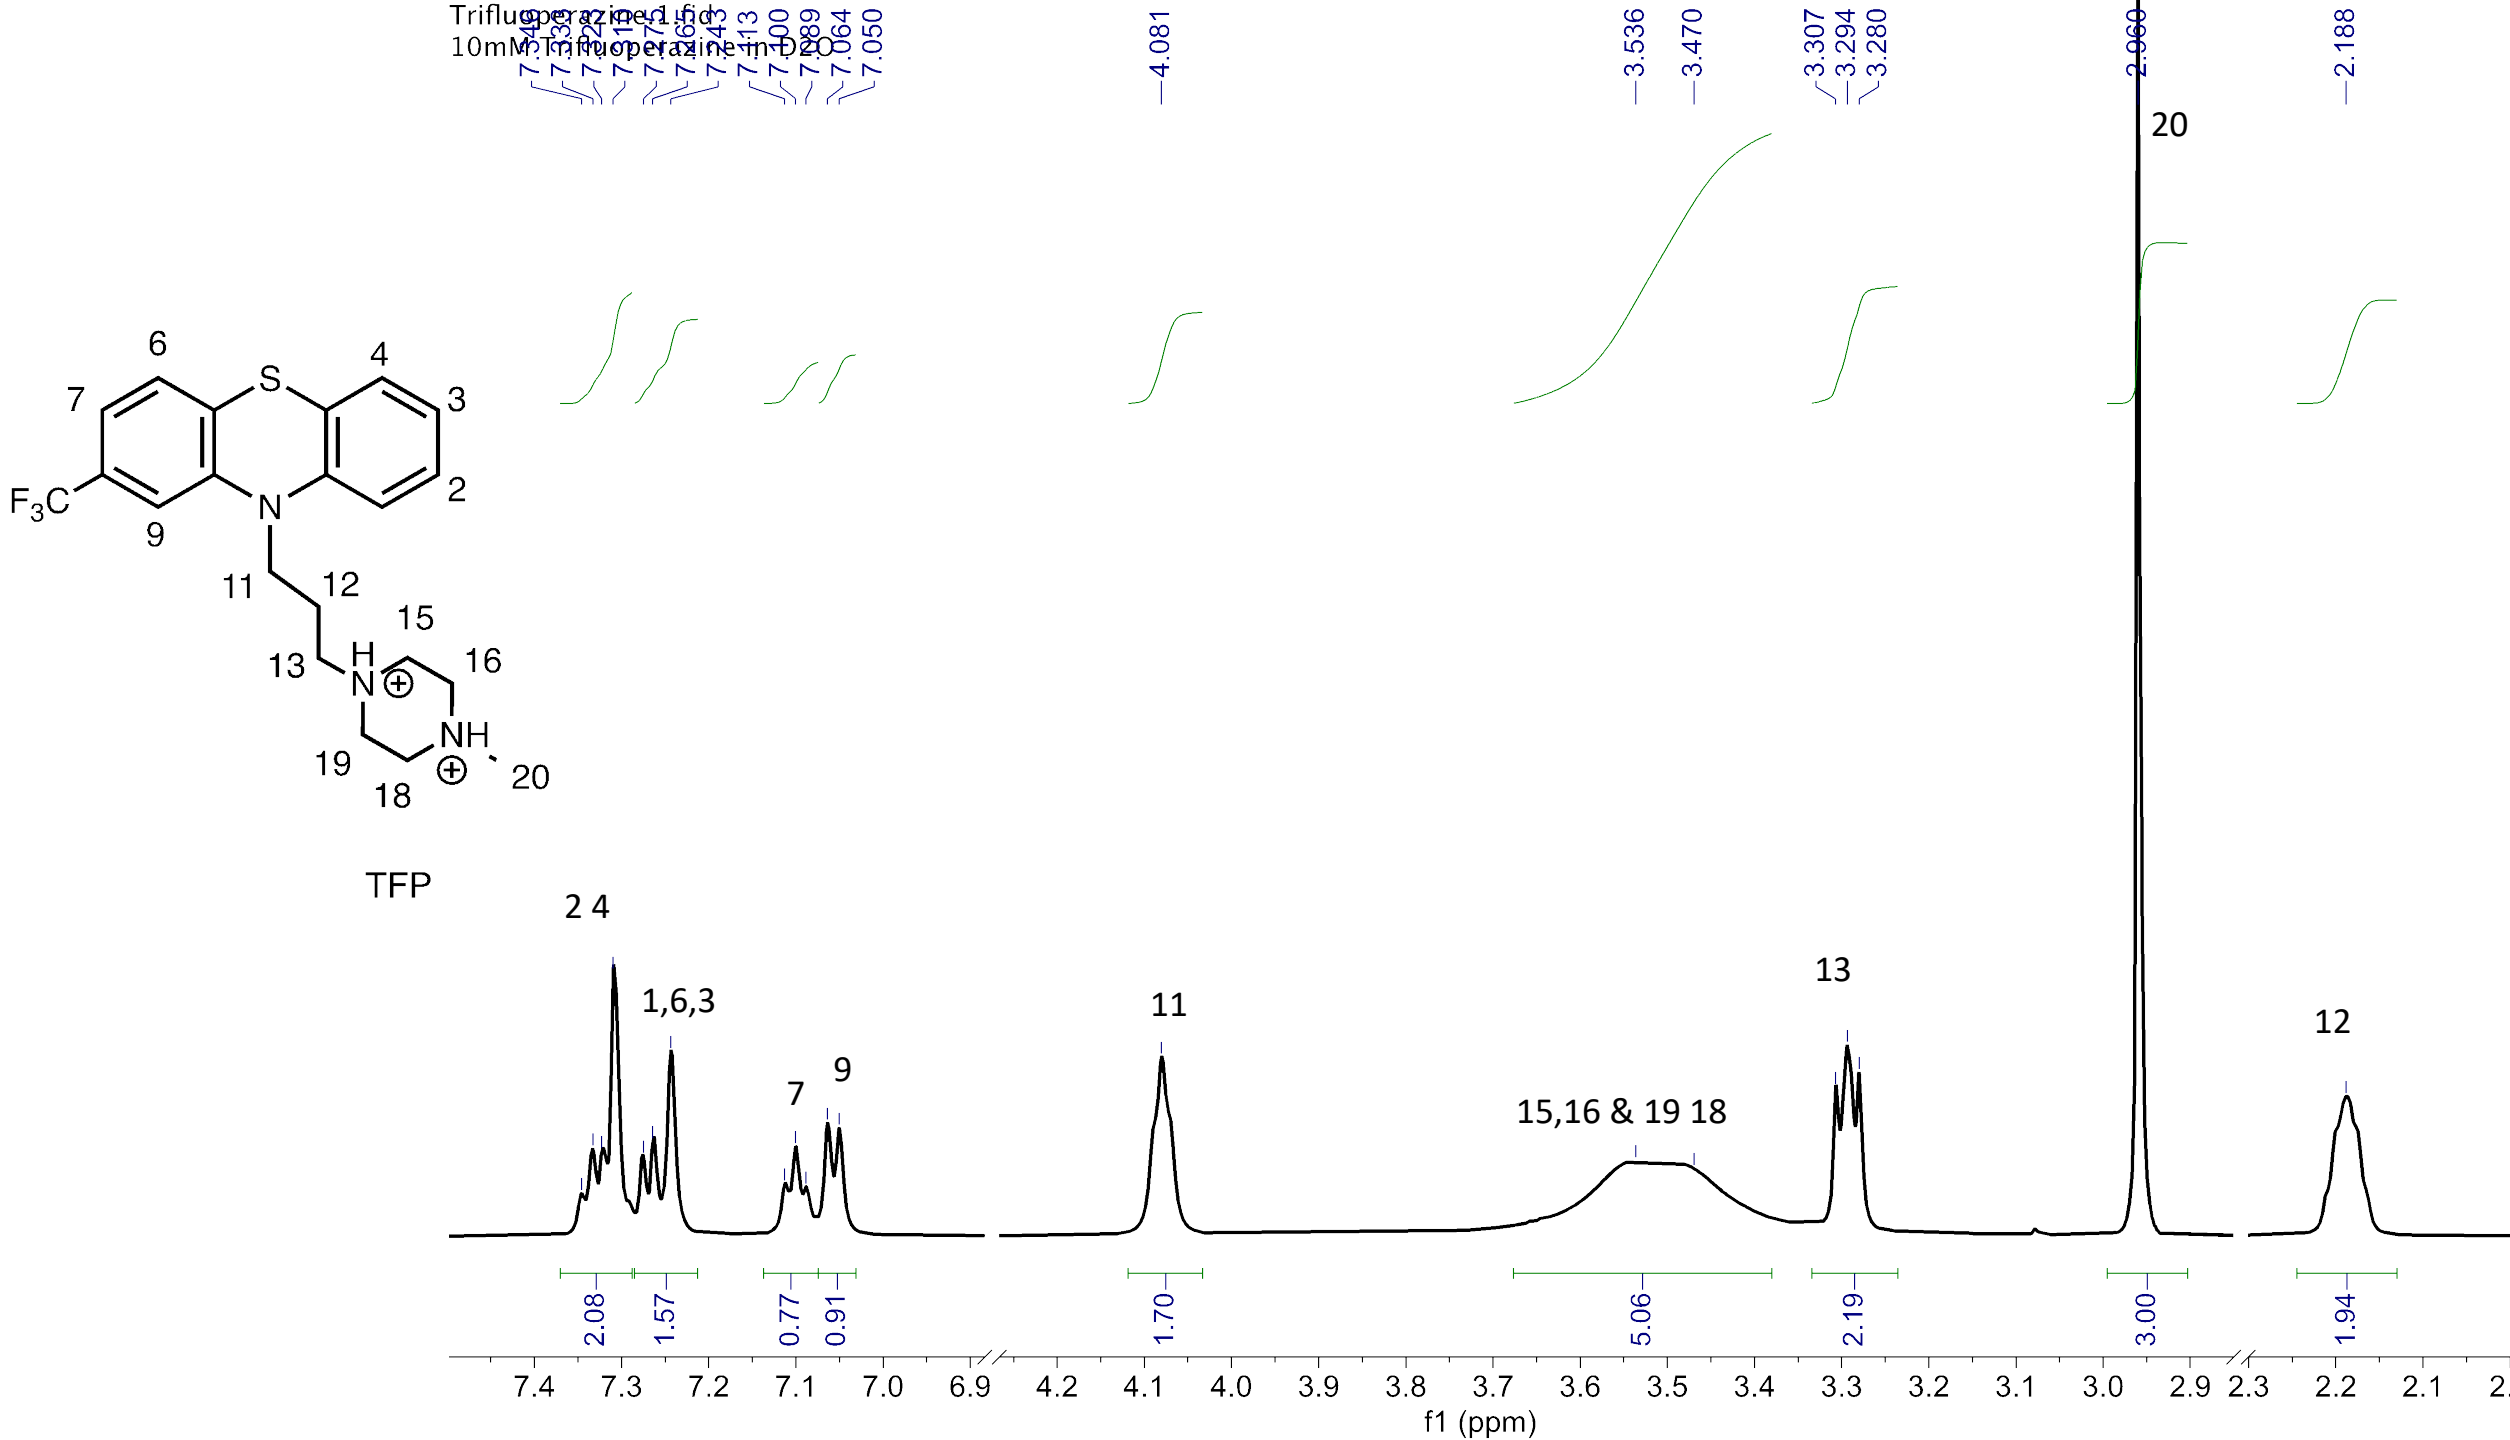

# $^1\text{H}$ NMR of Cyclodextrin Derivatives



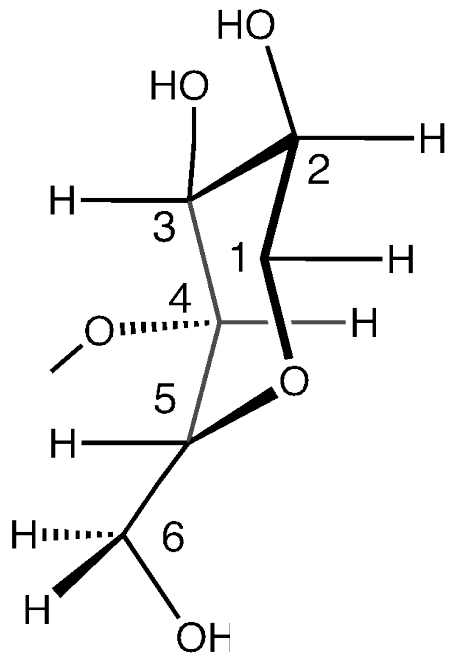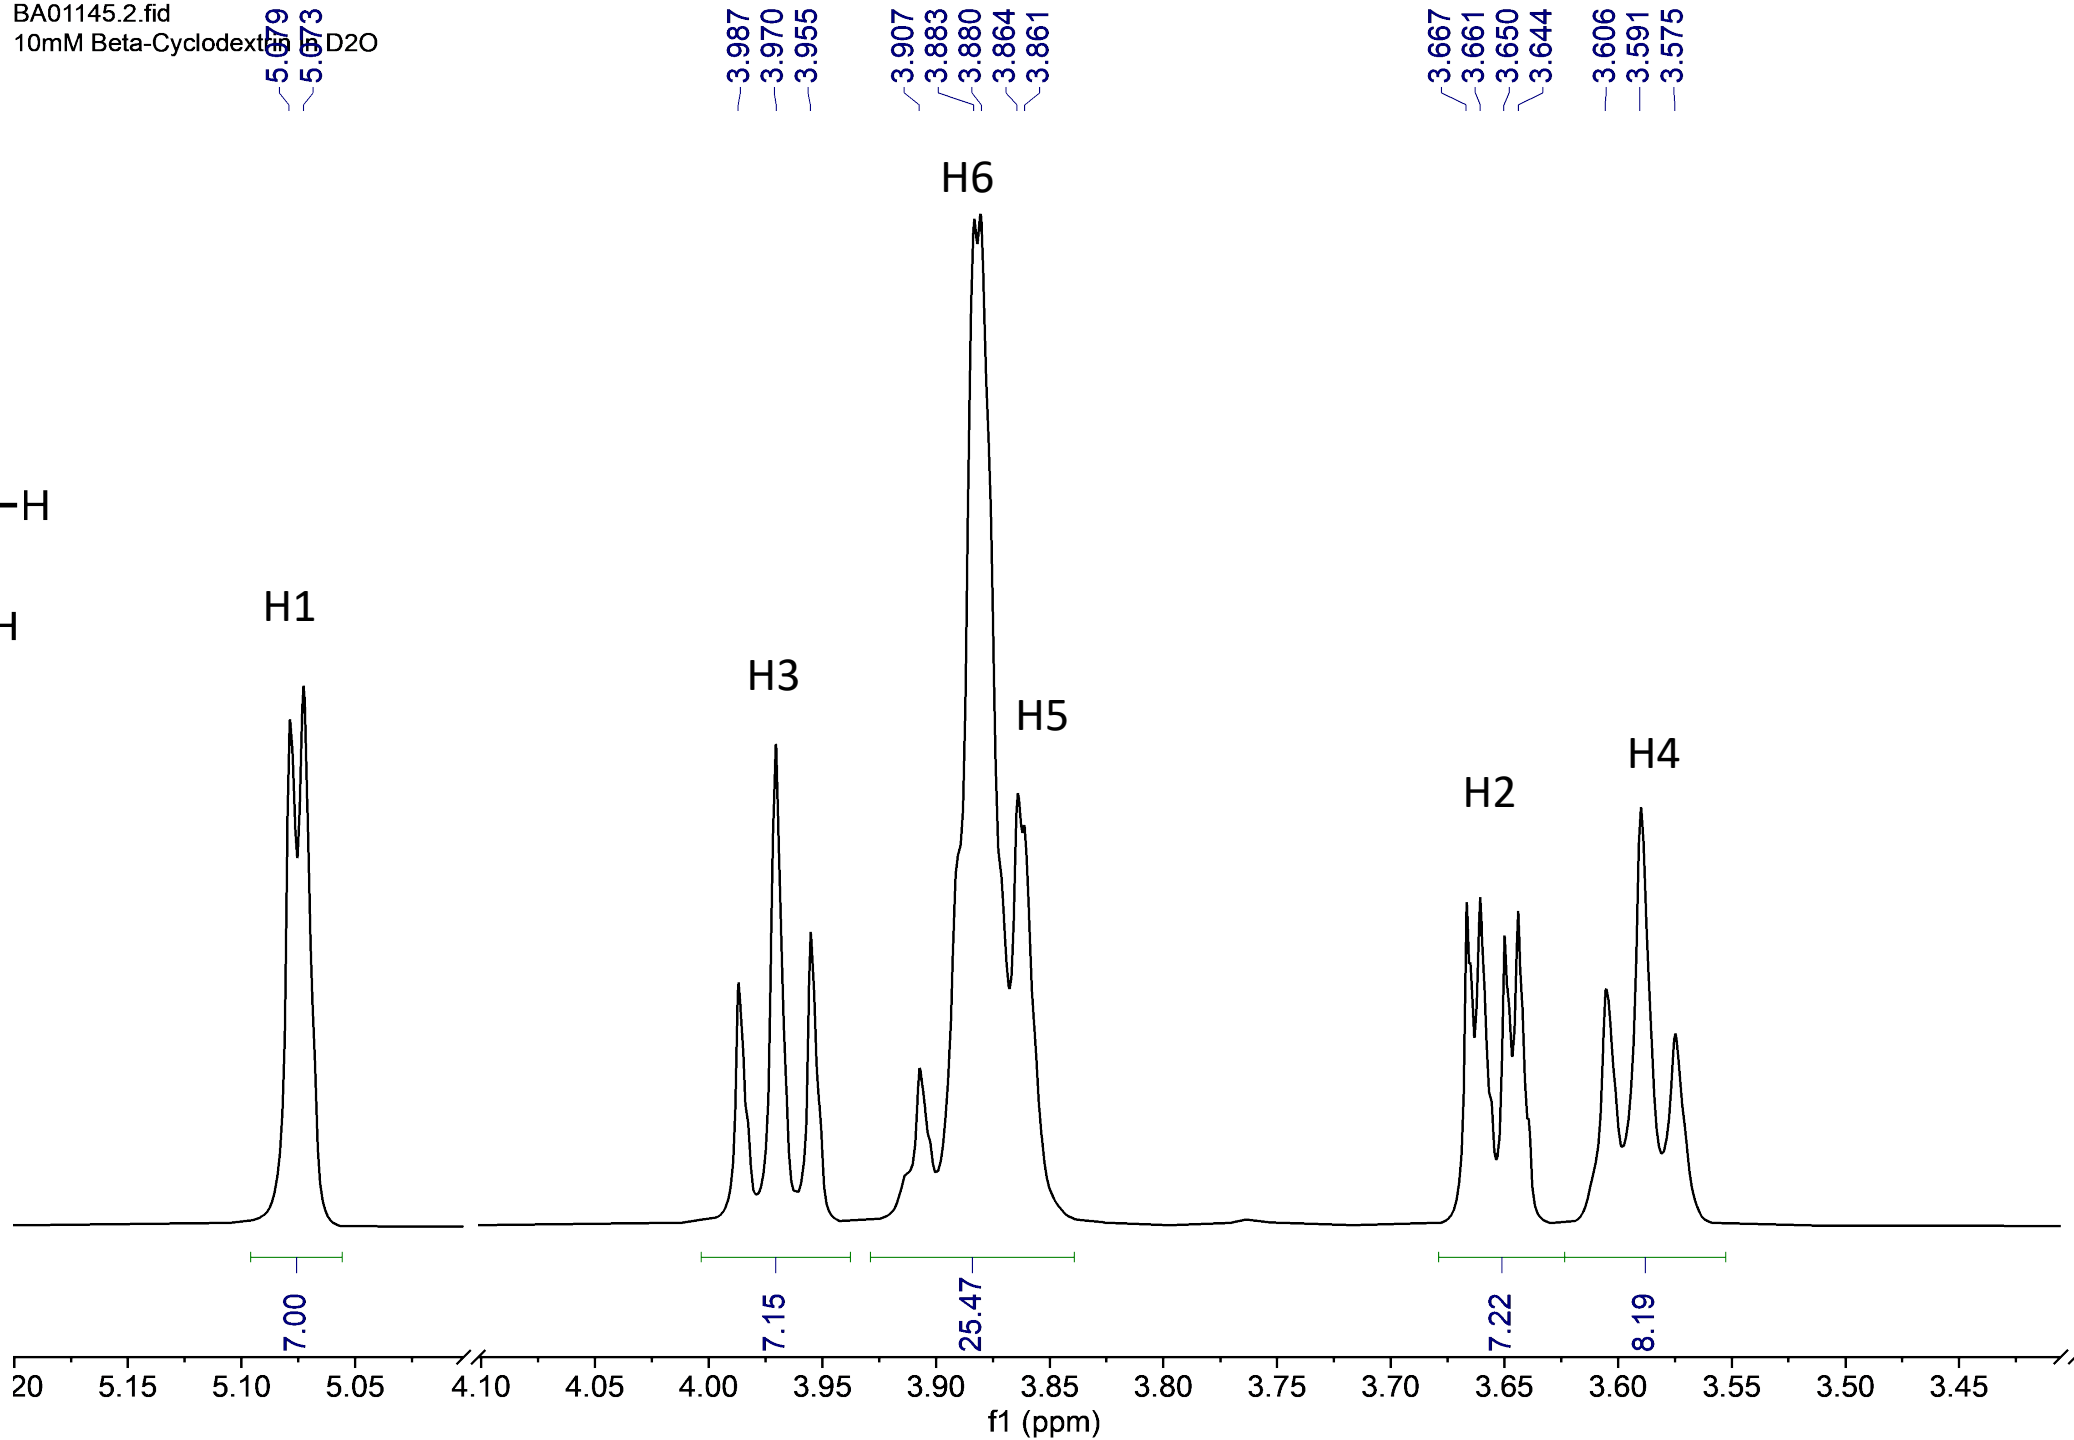

O-6M-BCD.1.fid  
Heptakis-(6-O-methyl)- $\beta$ -CD 10mM

5.054  
5.047

3.939  
3.932  
3.923  
3.907

3.757  
3.751

3.649  
3.643  
3.633  
3.627  
3.601  
3.585  
3.569

3.407

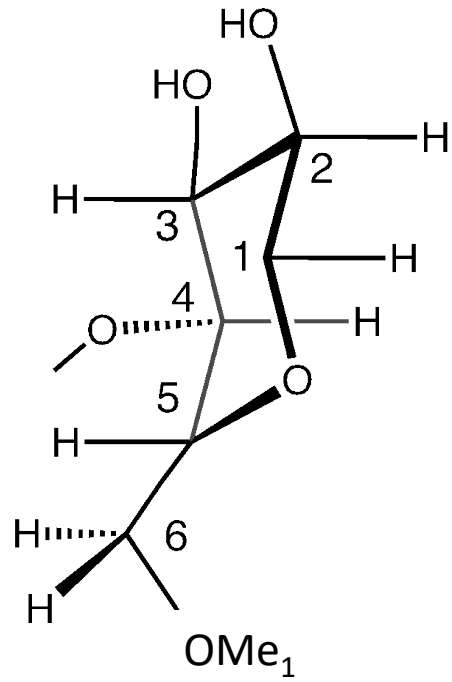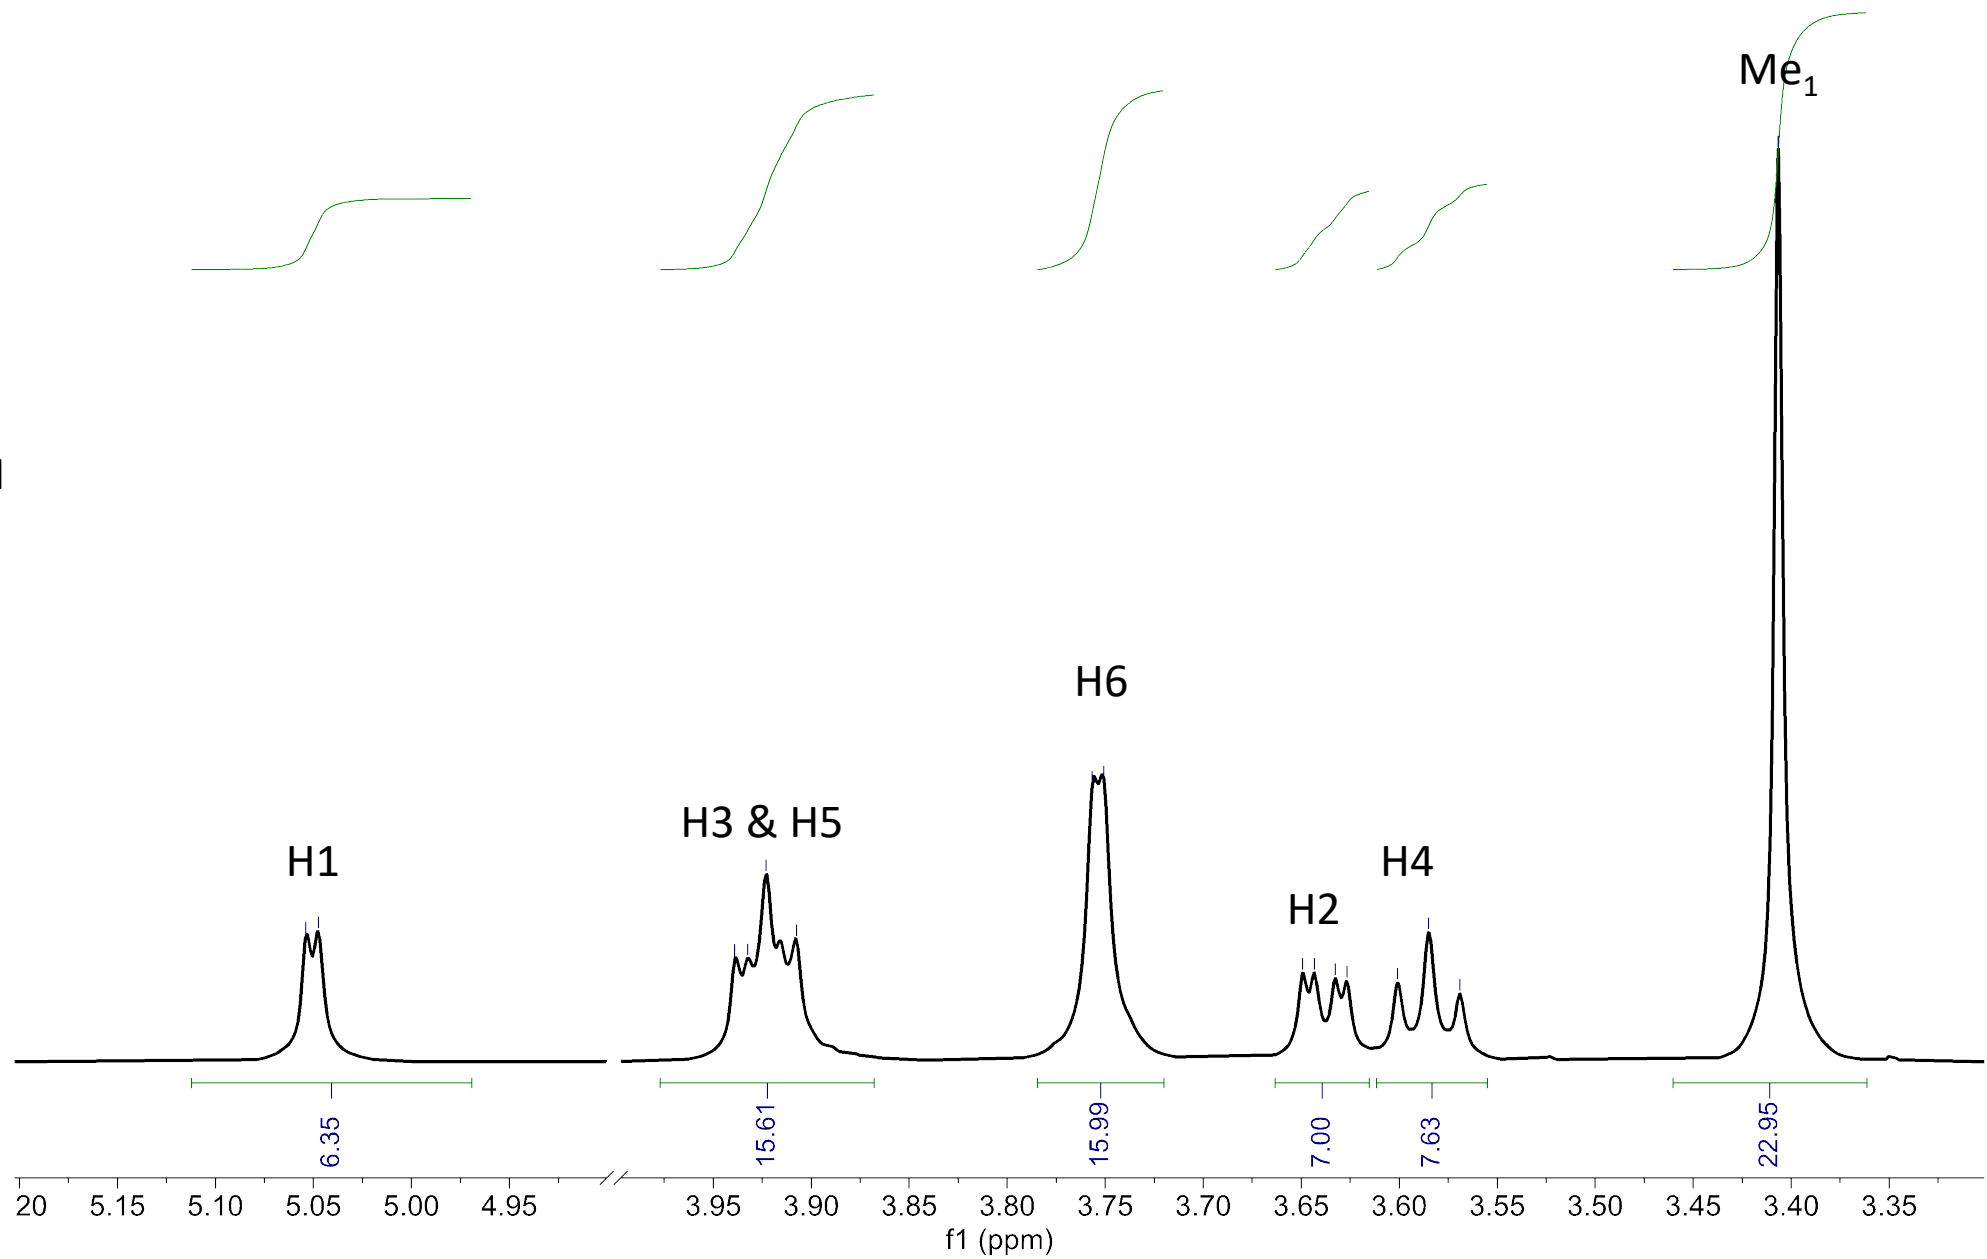

H26DM-BCD.1.fid  
Heptakis-(2,6-dimethyl)-BCD 10mM

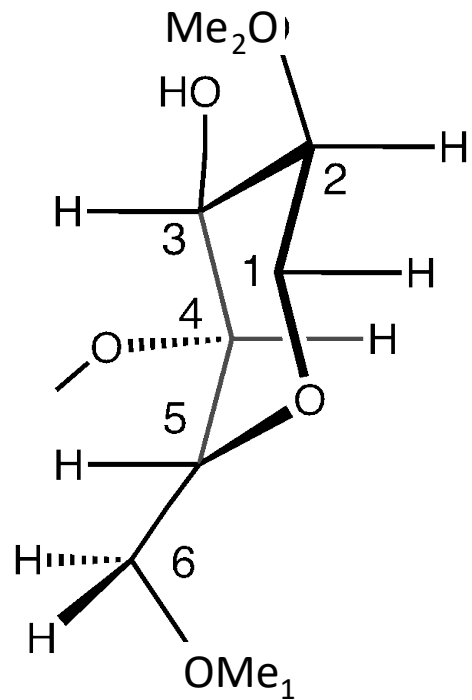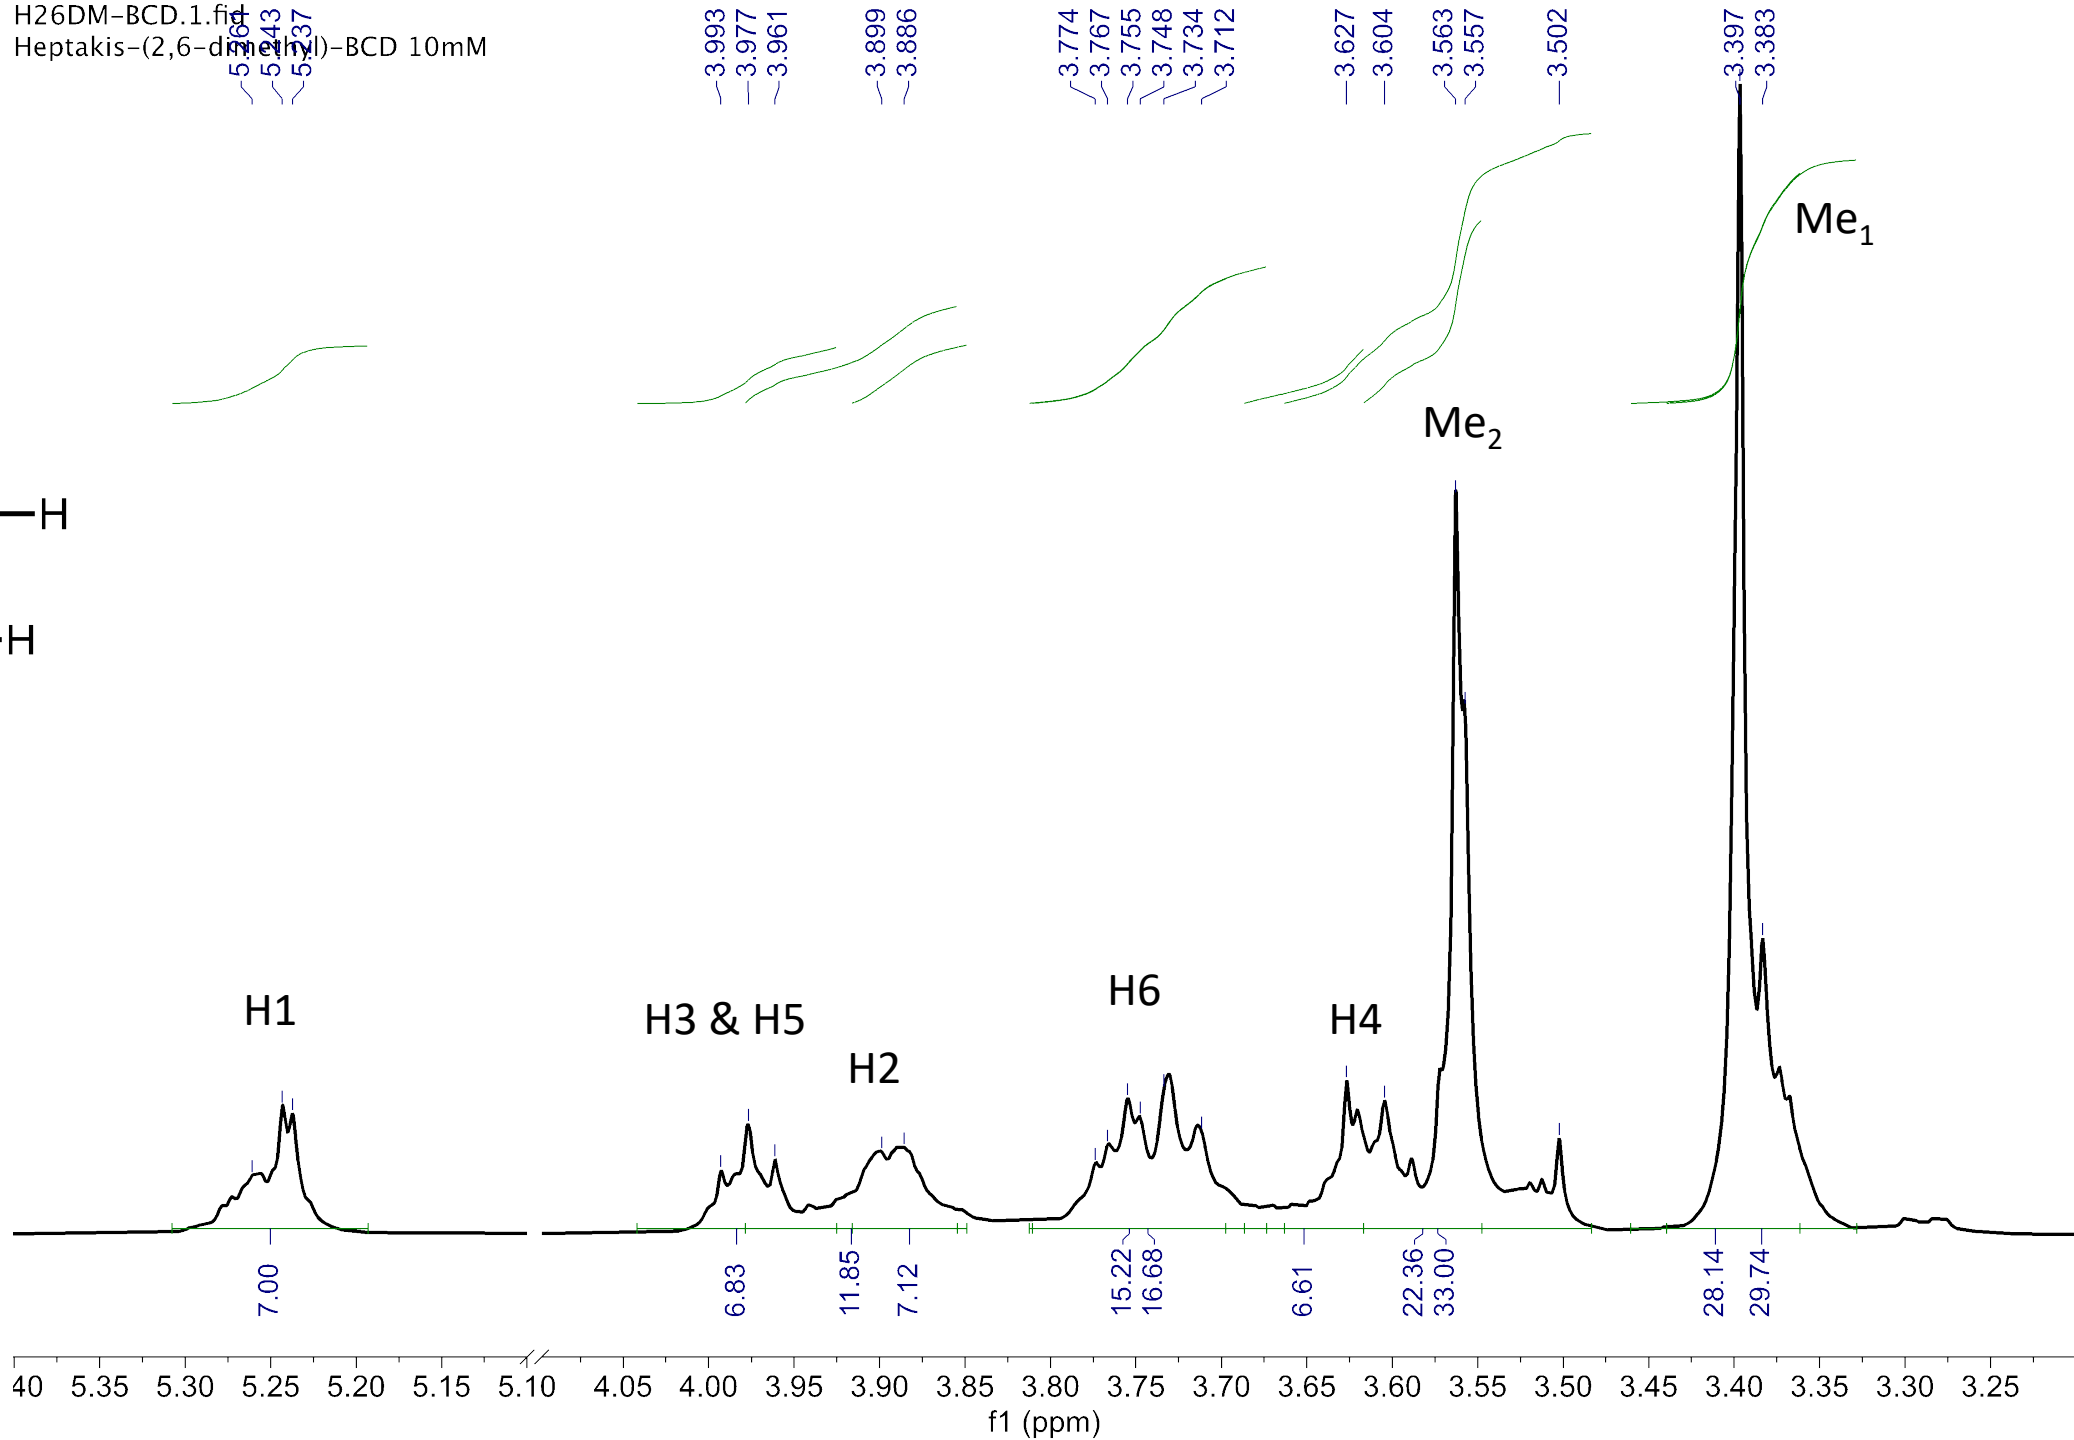

# $^1\text{H}$ NMR of $\beta$ -CD with Phenothiazines

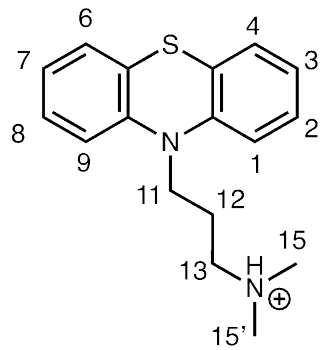

PMZ

BA01146.1.fid  
10mM Guest in D<sub>2</sub>O

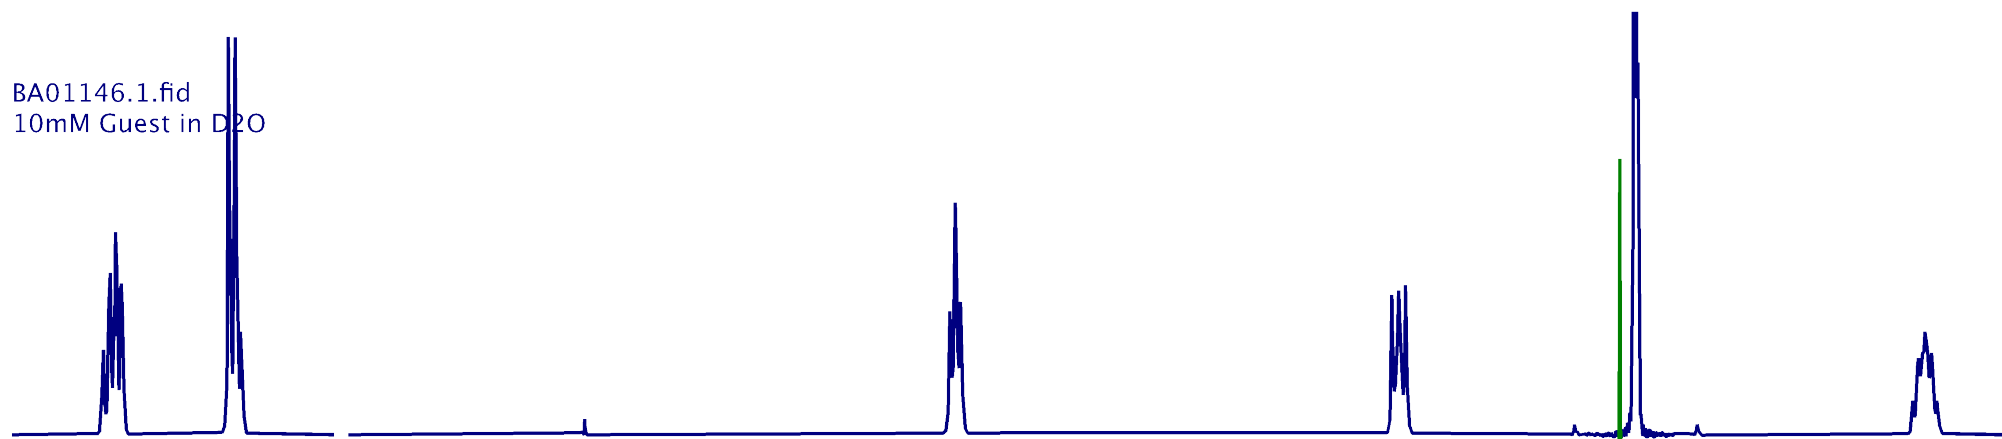

BA01146.2.fid  
5mM 1:1 Complex in D<sub>2</sub>O

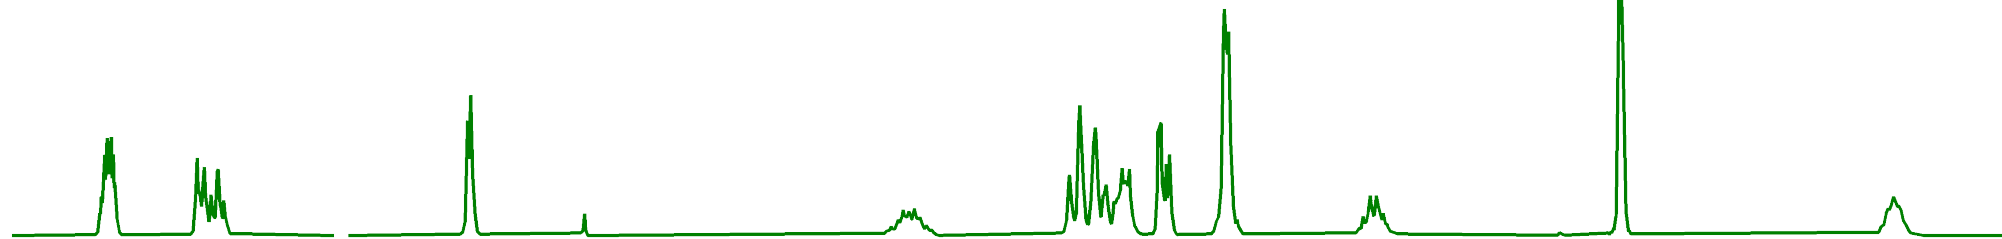

BA01145.2.fid  
10mM Beta-Cyclodextrin in D<sub>2</sub>O

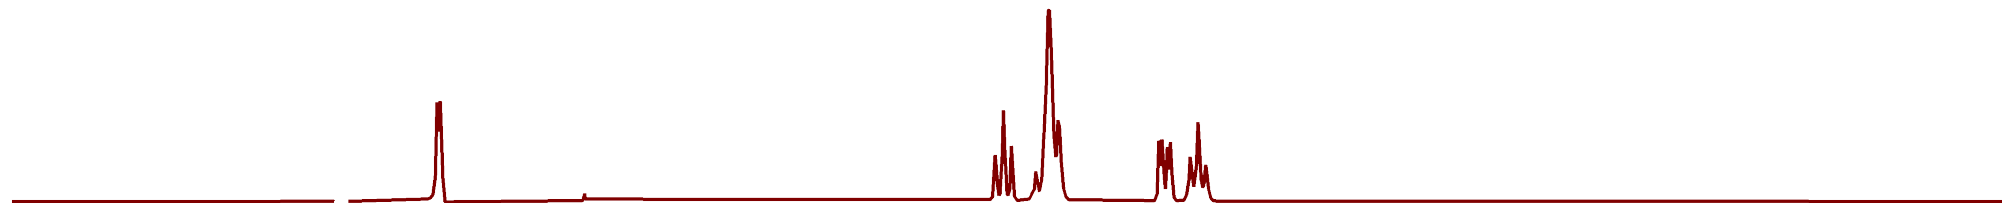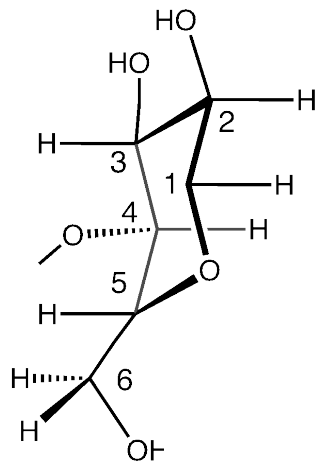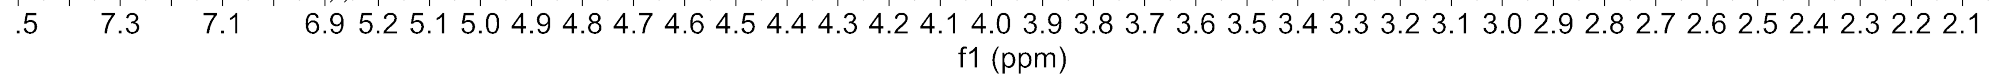

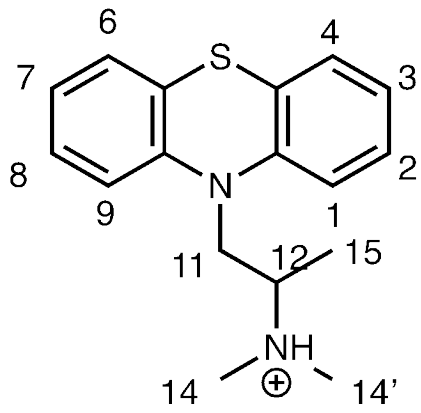

PMT

promethazine.1.fid  
10mM Promethazine in D<sub>2</sub>O

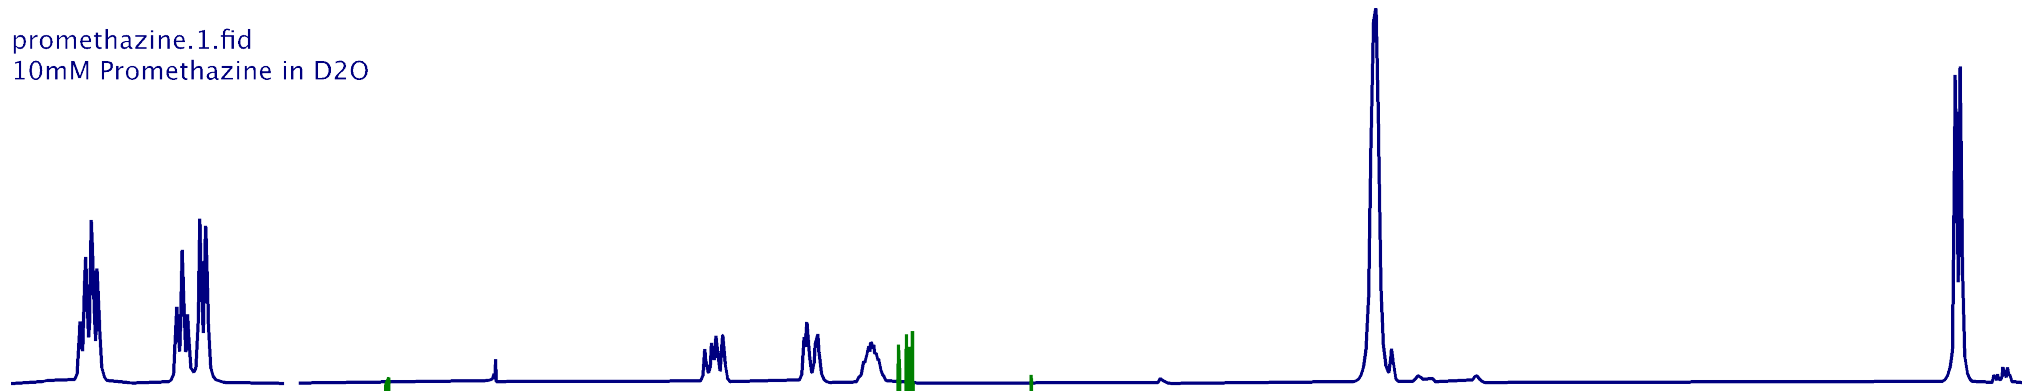

BCD-PMT.1.fid

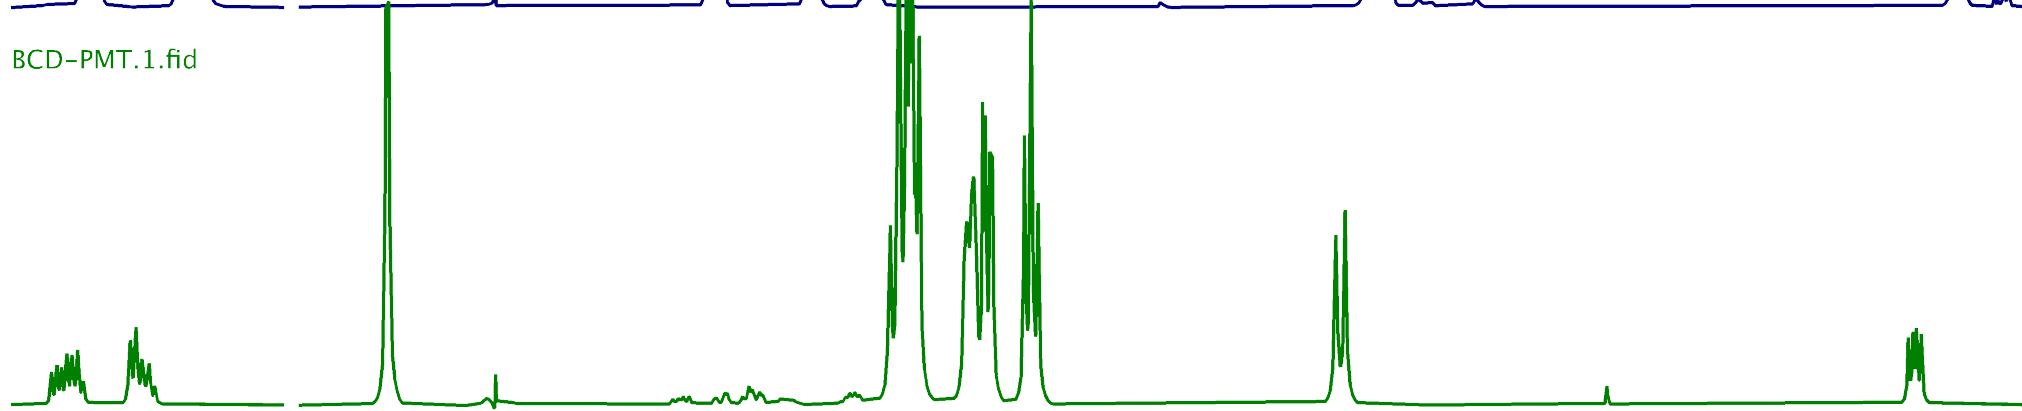

BA01145.2.fid  
10mM Beta-Cyclodextrin in D<sub>2</sub>O

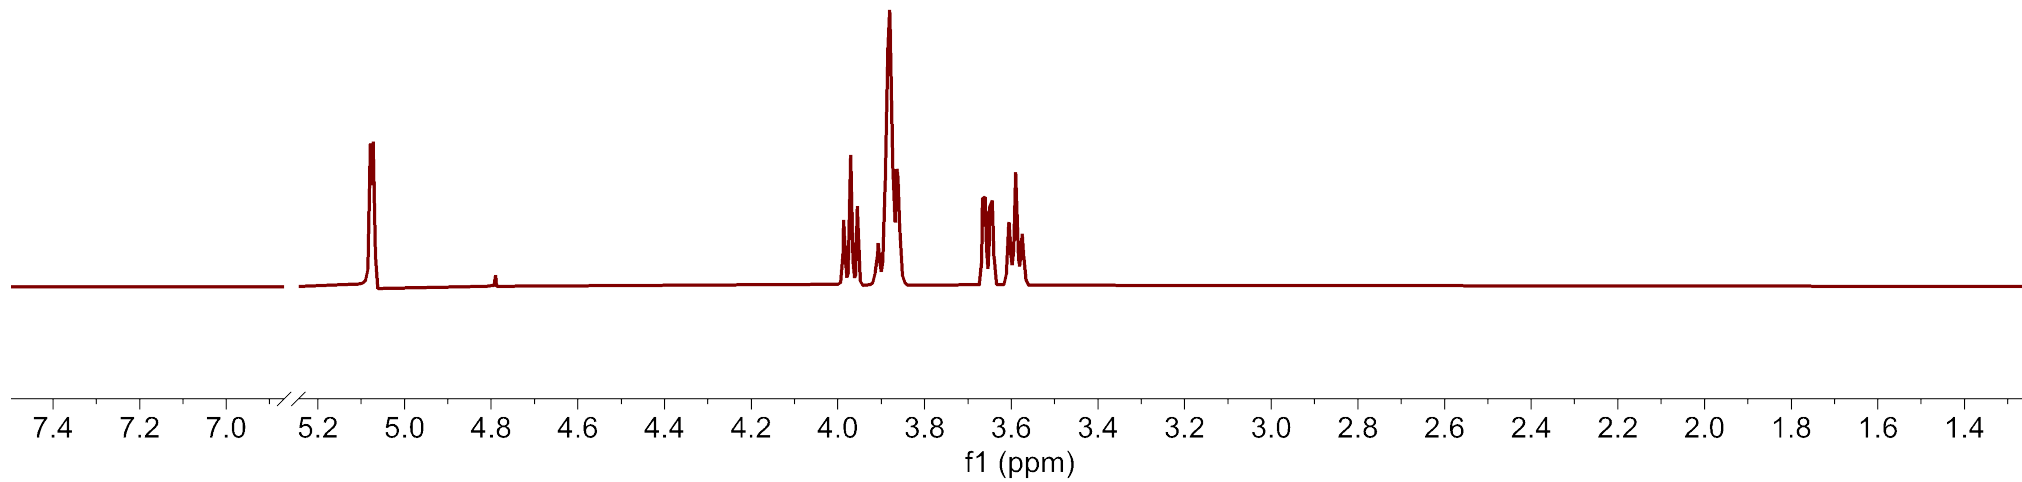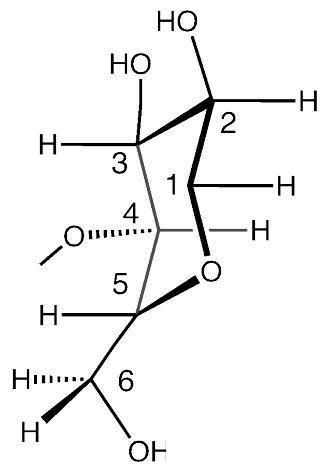

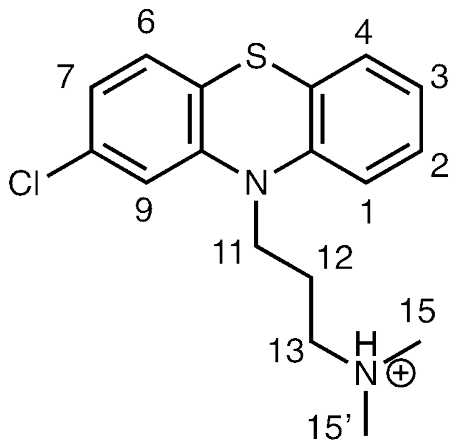

CPZ

Chlorpromazine.1.fid  
10mM Chlorpromazine in D2O

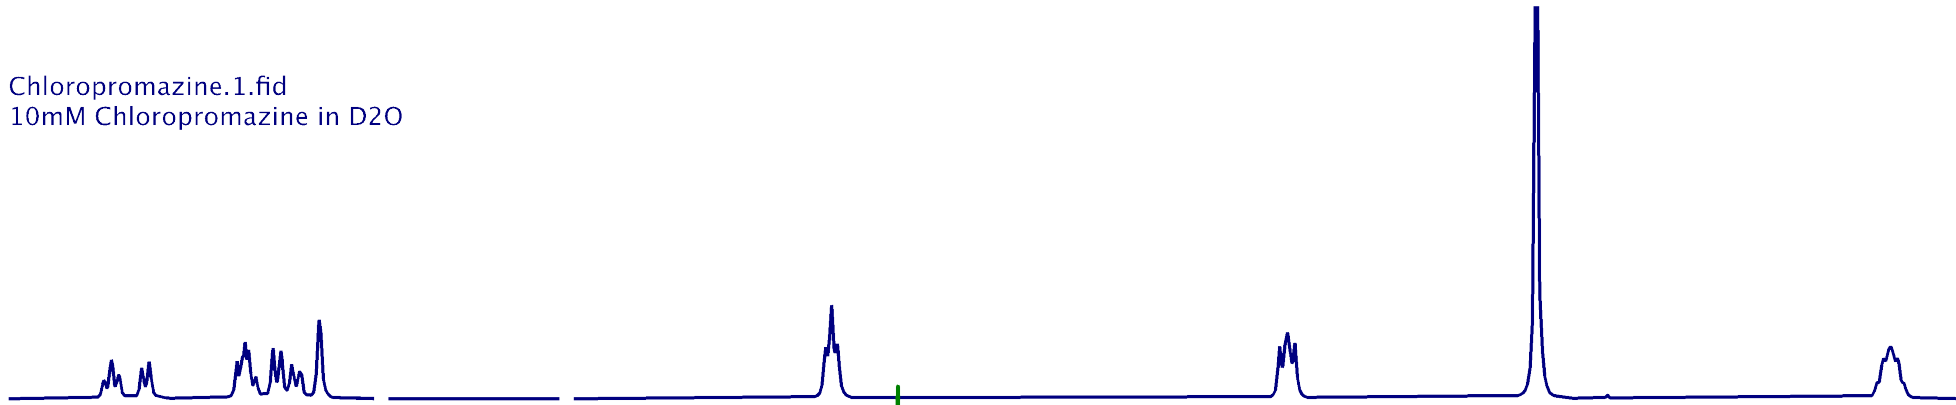

BA02060.5.fid  
6.6 mM Beta-CD: 3.3 mM CPZ

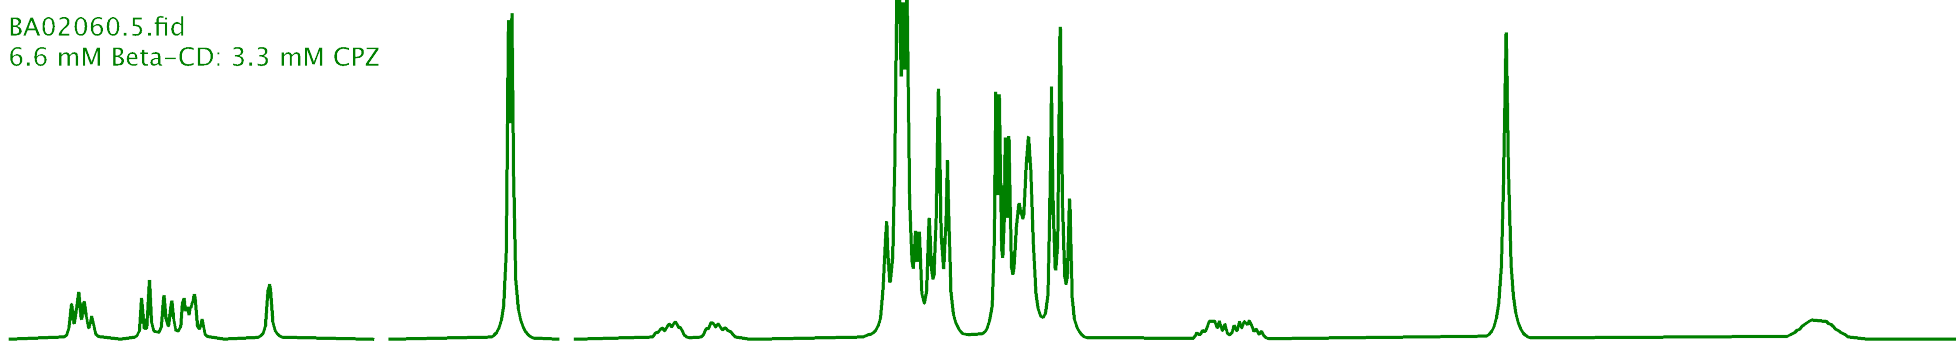

BA01145.2.fid  
10mM Beta-Cyclodextrin in D2O

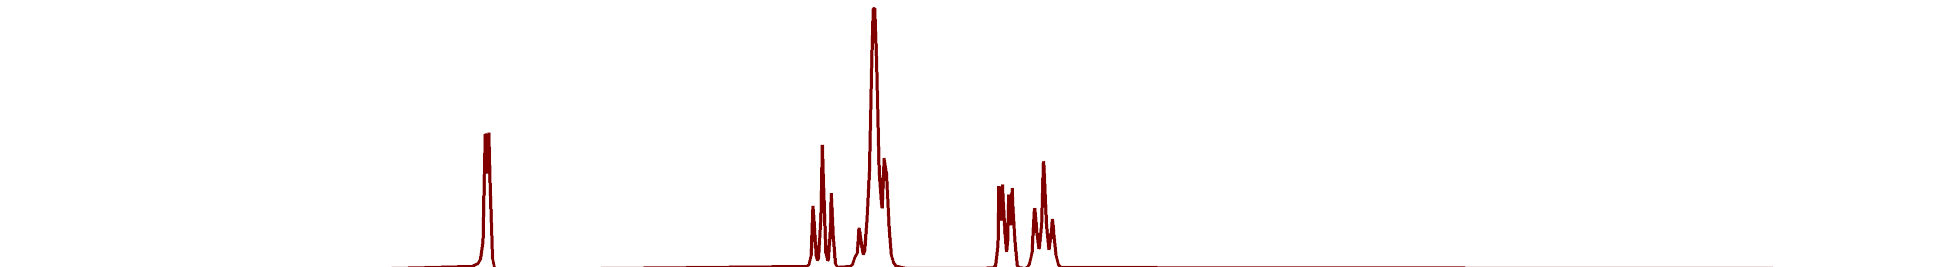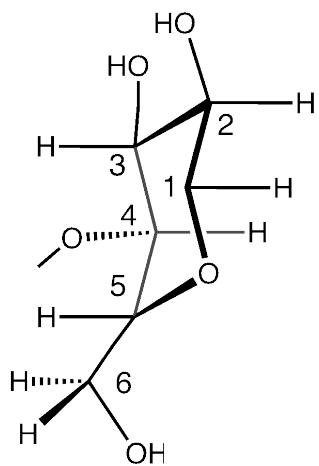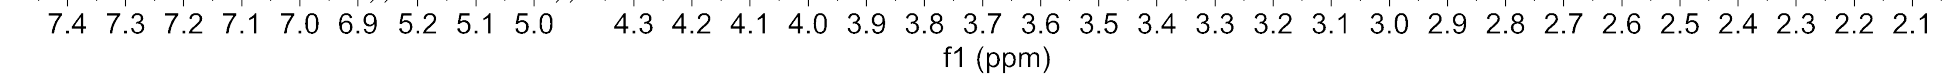

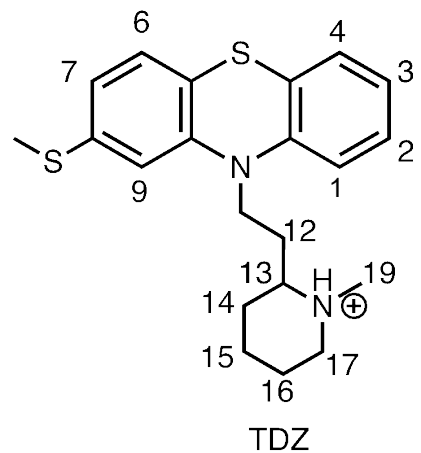

BA01147.4.fid  
10mM Guest in D2O

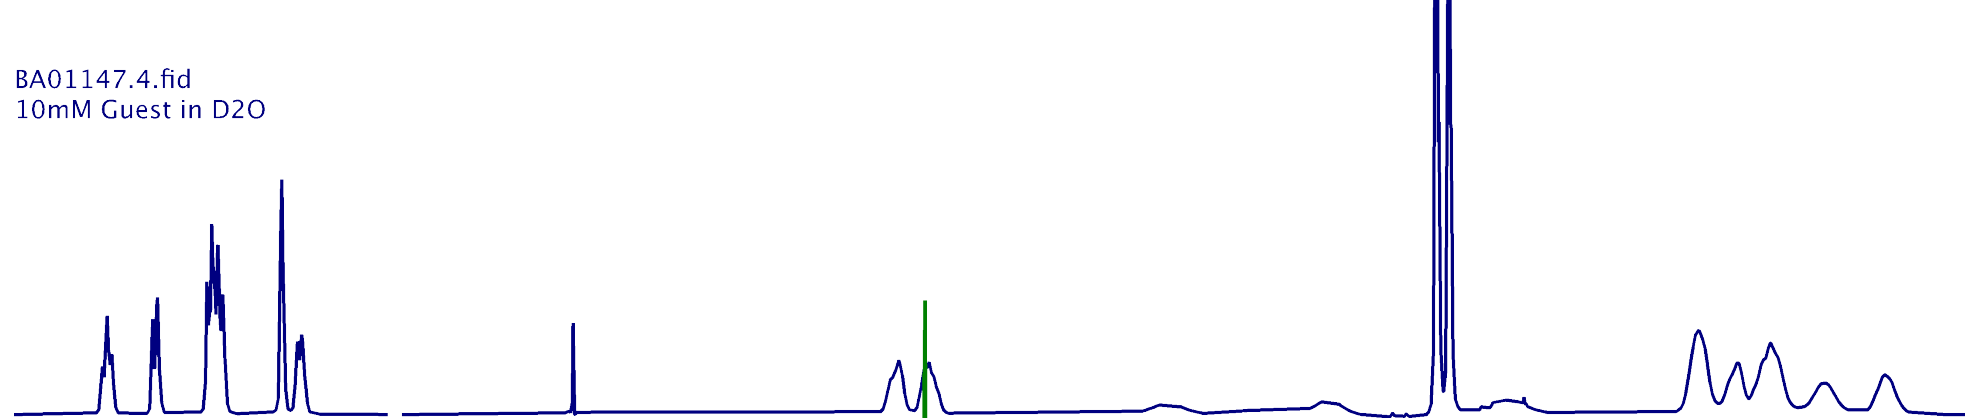

BA01147.2.fid  
5mM 1:1 Complex in D2O

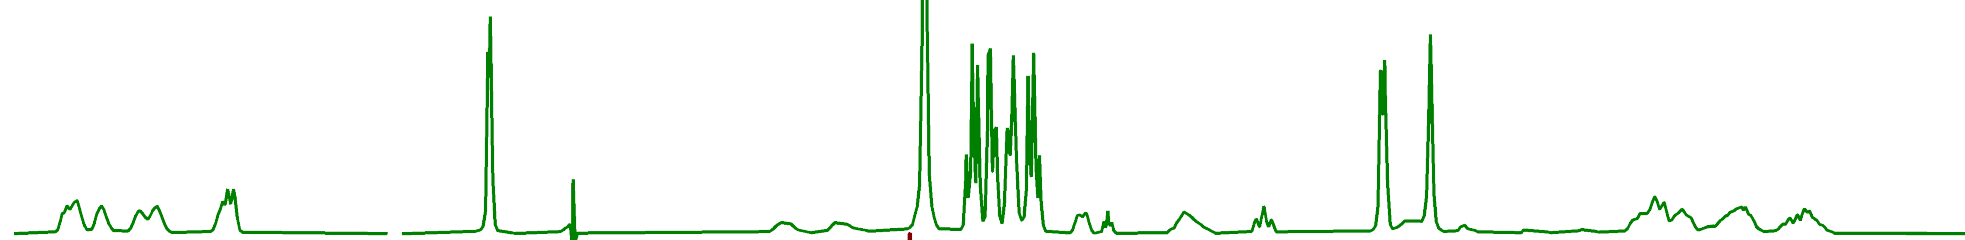

BA01145.2.fid  
10mM Beta-Cyclodextrin in D2O

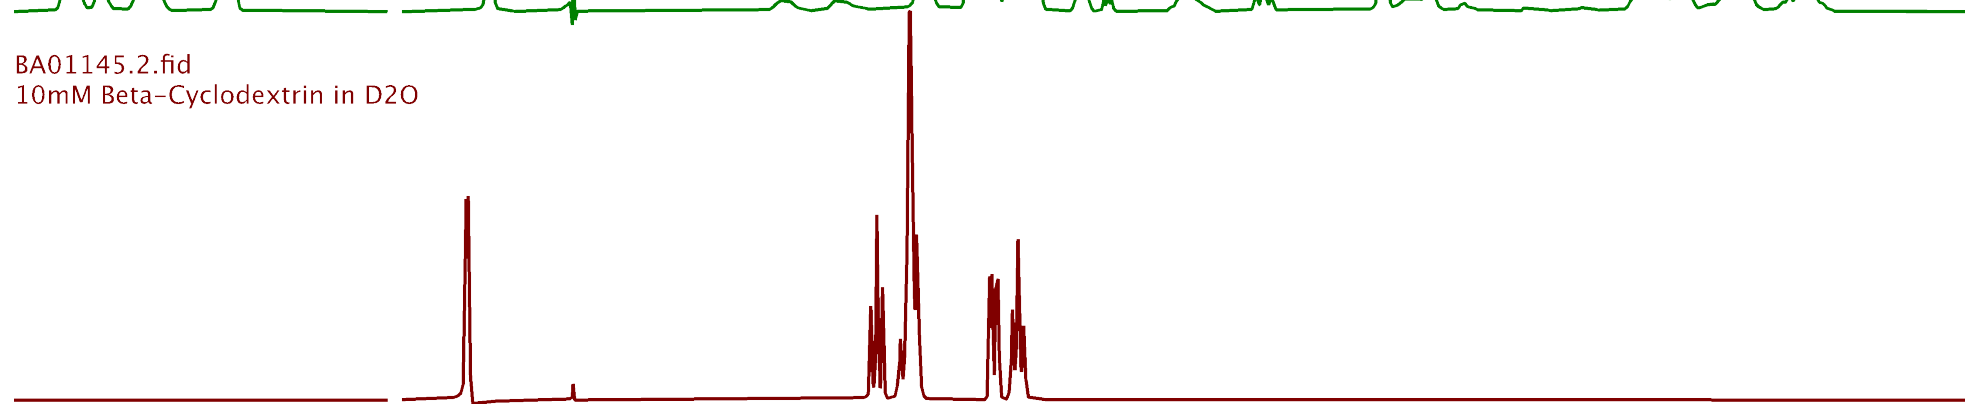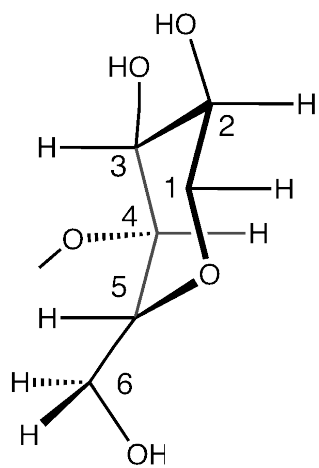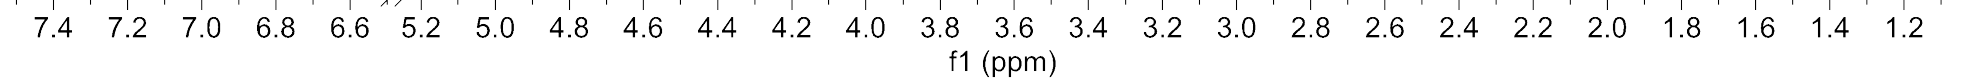



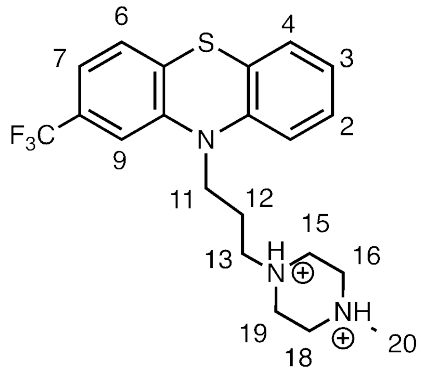

TFP

BA01148.1.fid  
10mM Guest in D<sub>2</sub>O

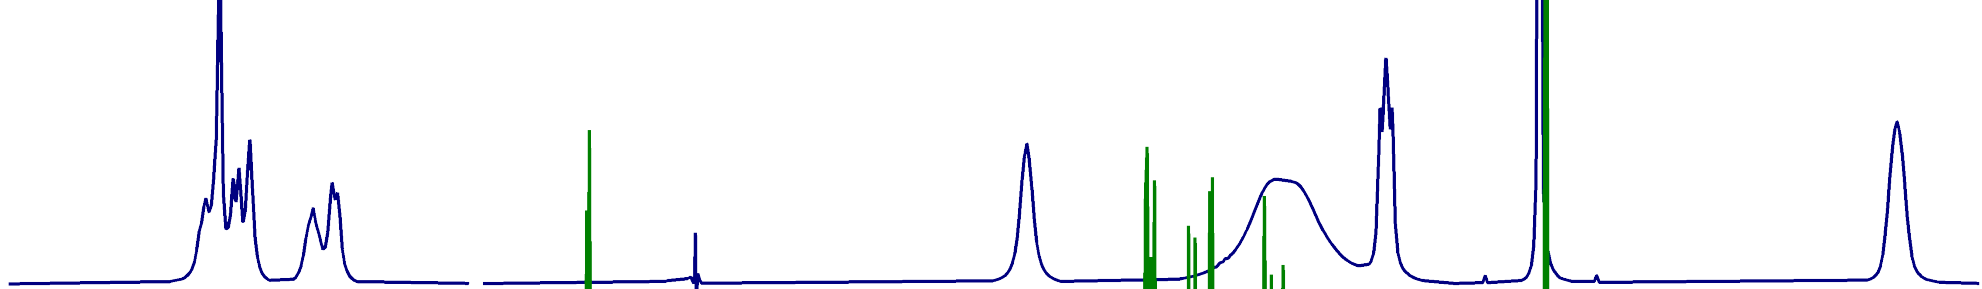

BA01148.2.fid  
5mM 1:1 Complex in D<sub>2</sub>O

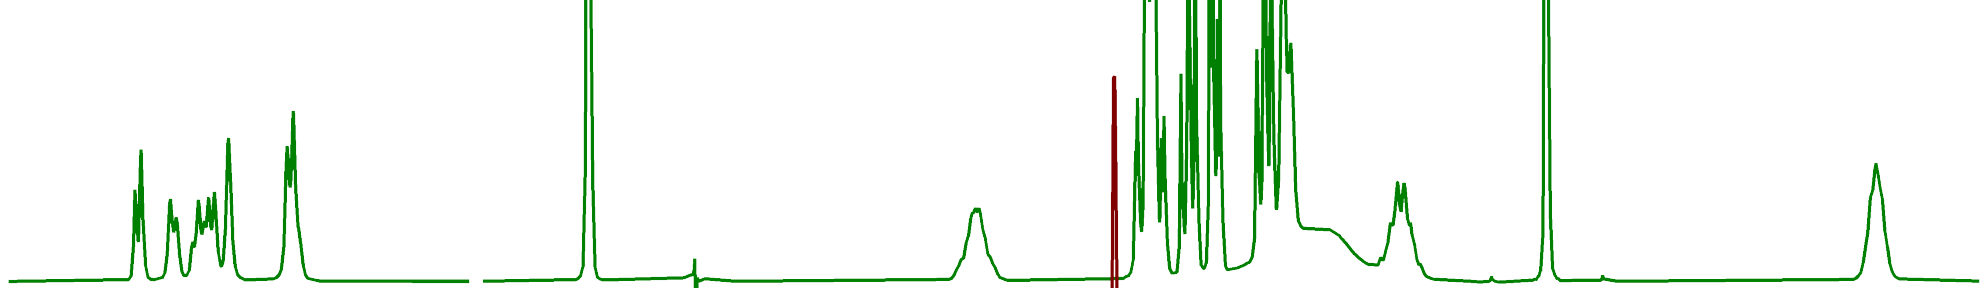

BA01145.2.fid  
10mM Beta-Cyclodextrin in D<sub>2</sub>O

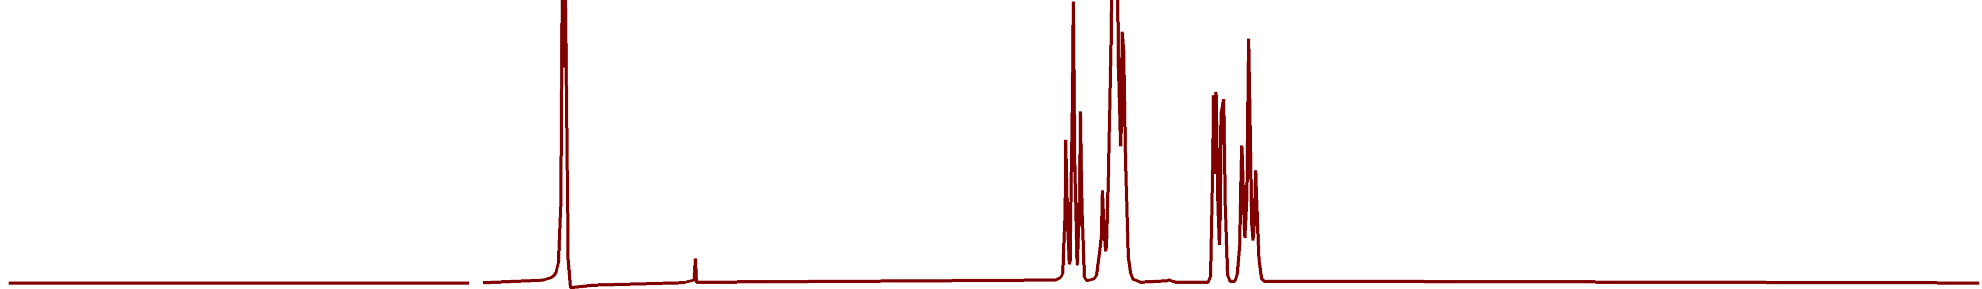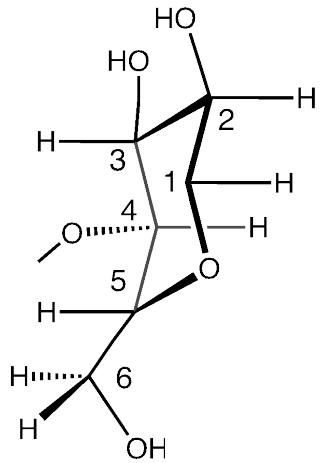

7.6 7.4 7.2 7.0 6.8 // 5.2 5.0 4.8 4.6 4.4 4.2 4.0 3.8 3.6 3.4 3.2 3.0 2.8 2.6 2.4 2.2

f1 (ppm)

$^1\text{H}$  NMR of MM- $\beta$ -CD  
with Phenothiazines

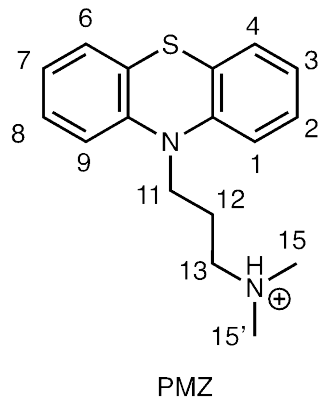

Promazine.1.fid  
10mM Promazine in D2O

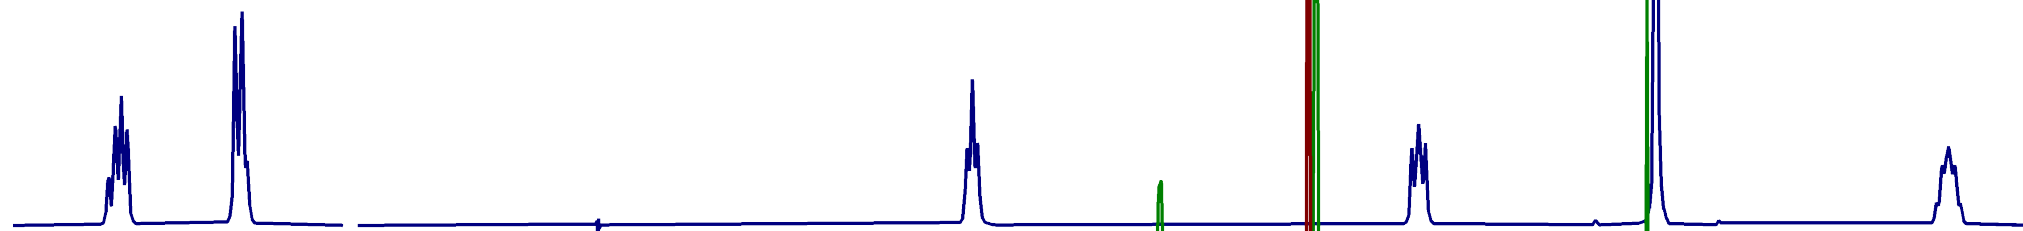

O-6Me-BCD-Phenothiazine.1.fid  
O-6Me-BCD:PMZ 6mM:4mM

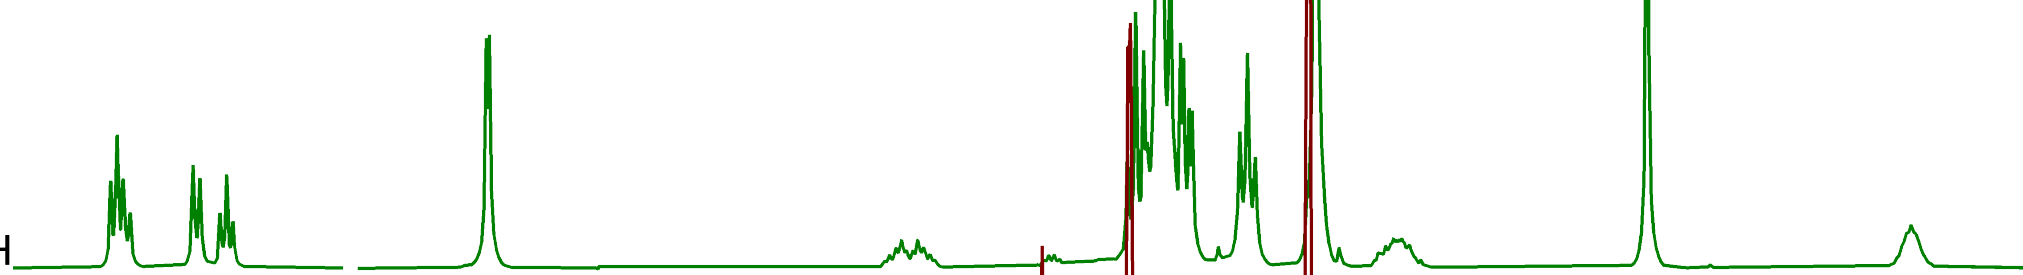

O-6M-BCD.1.fid  
Heptakis-(6-O-methyl)-BCD 10mM

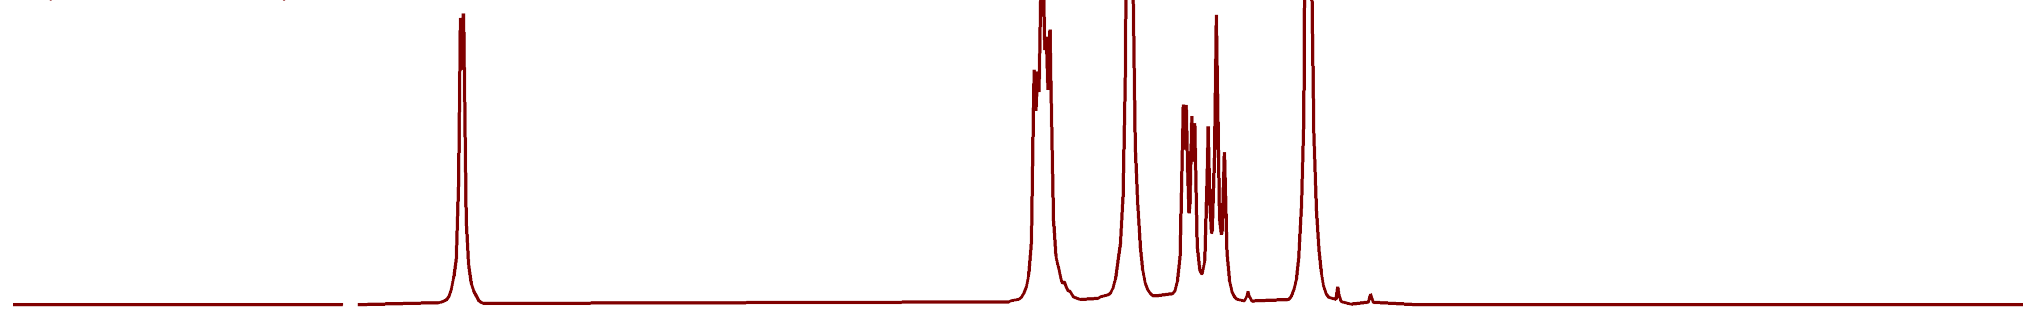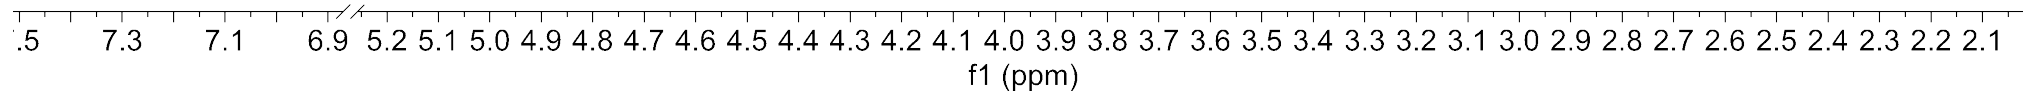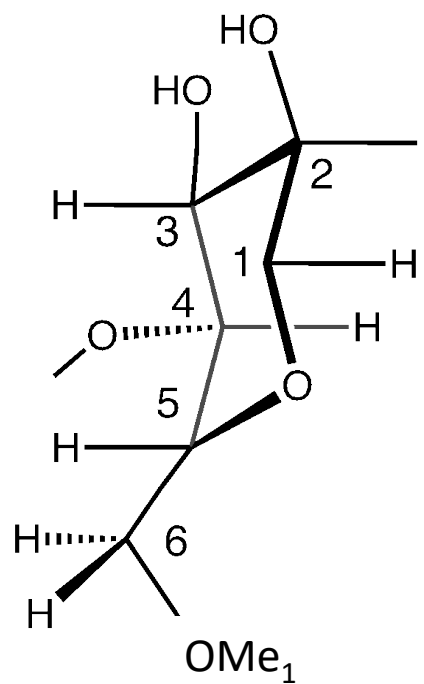

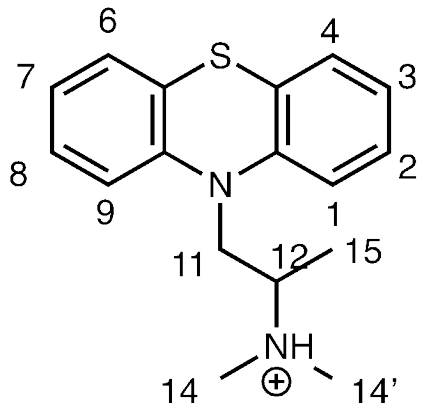

promethazine.1.fid  
10mM Promethazine in D2O

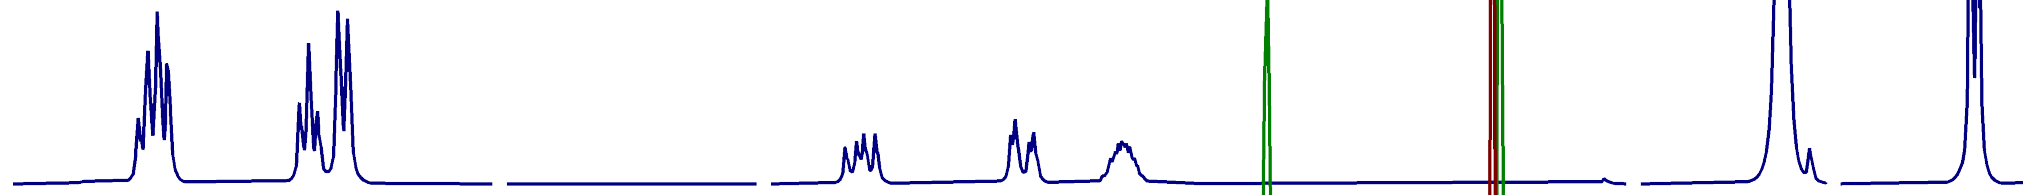

O-6Me-BCD-Phenothiazine.3.fid  
O-6Me-BCD:PMT 6mM:4mM

PMT

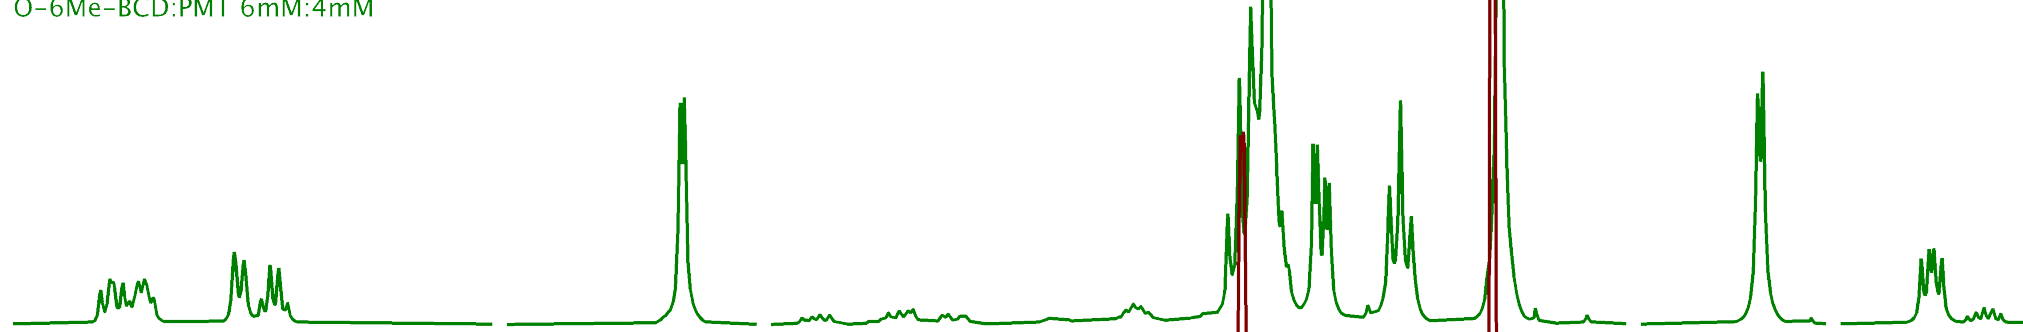

O-6M-BCD.1.fid  
Heptakis-(6-O-methyl)-BCD 10mM

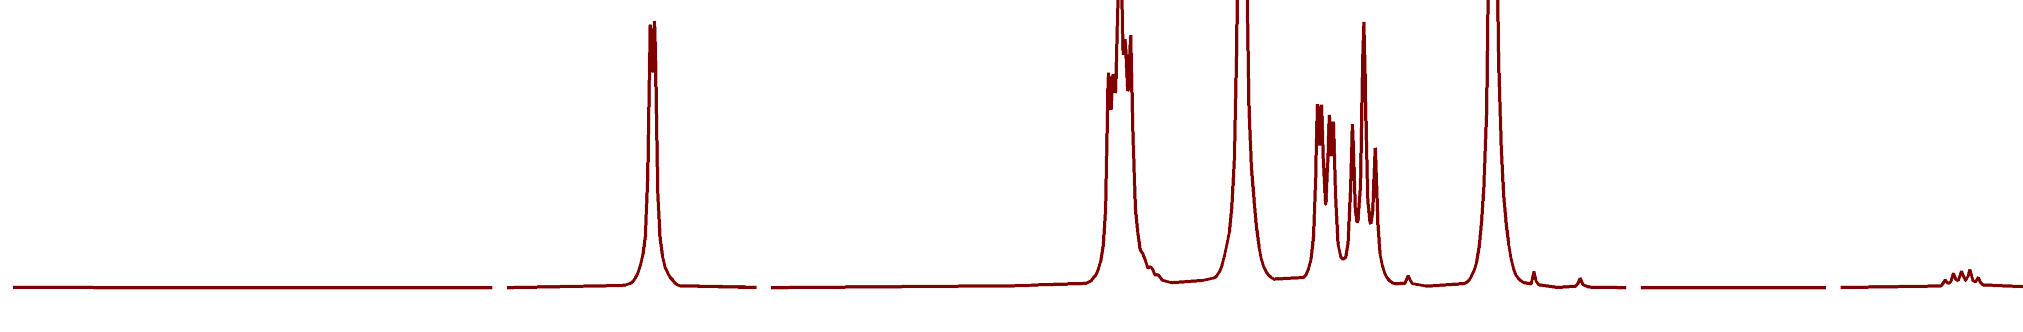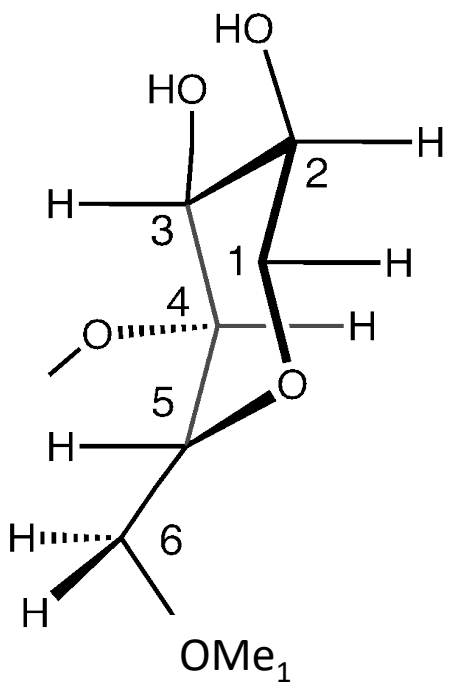

f1 (ppm)

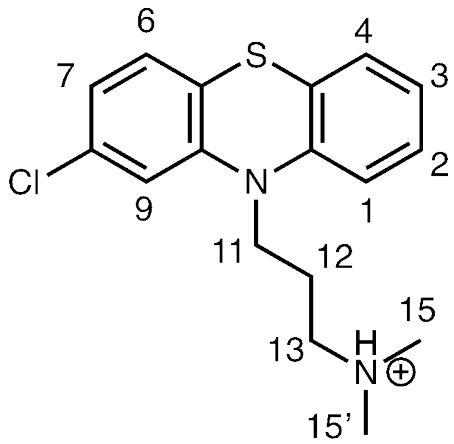

CPZ

Chlorpromazine.1.fid  
10mM Chlorpromazine in D2O

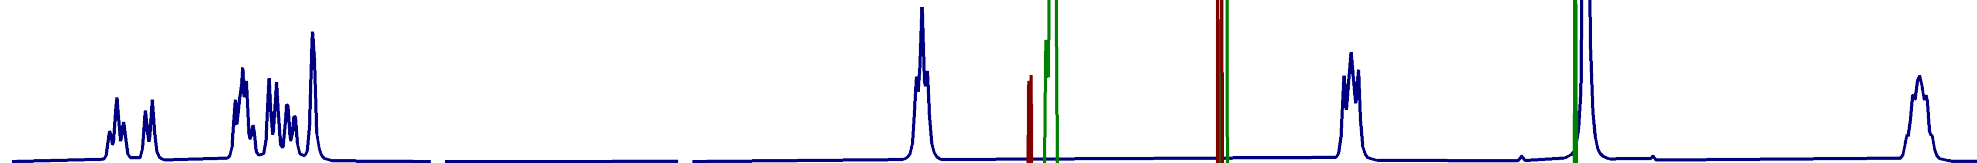

O-6Me-BCD-Phenothiazine.5.fid  
O-6Me-BCD:CPZ 6mM:4mM

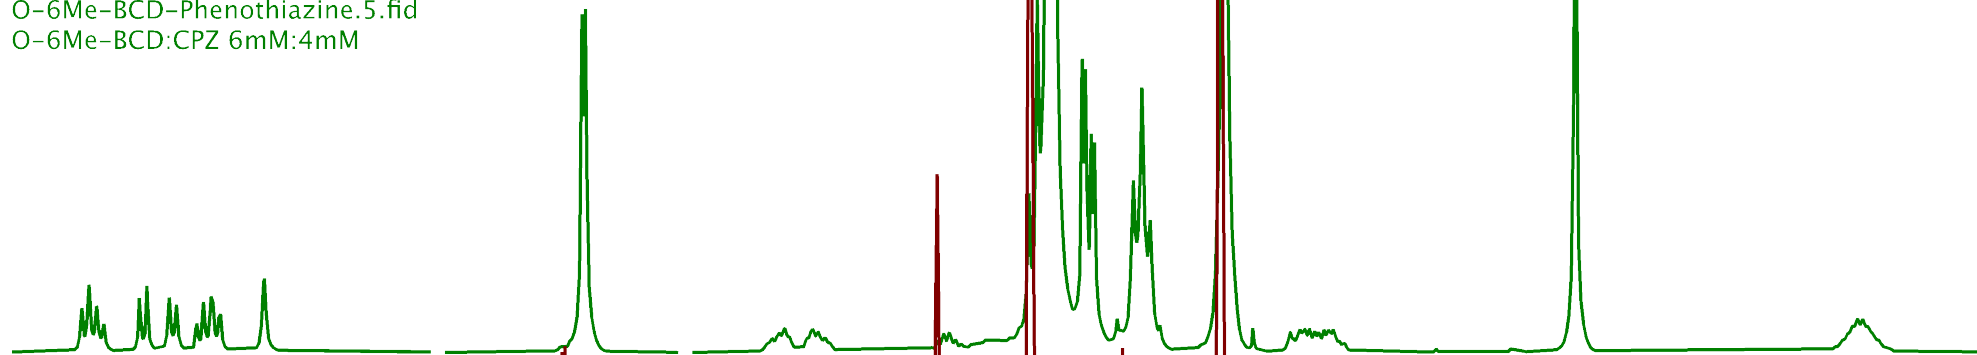

O-6M-BCD.1.fid  
Heptakis-(6-O-methyl)-BCD 10mM

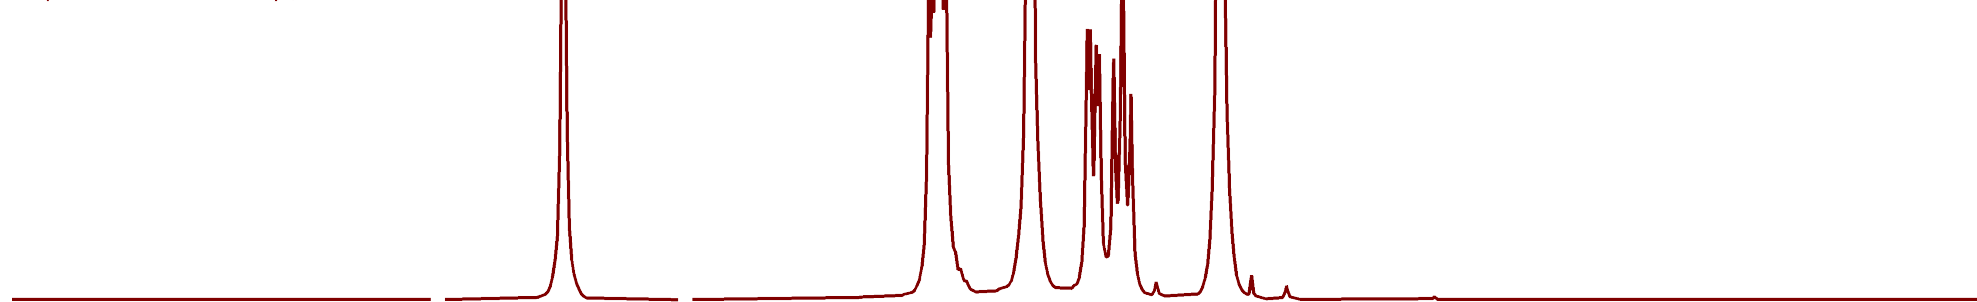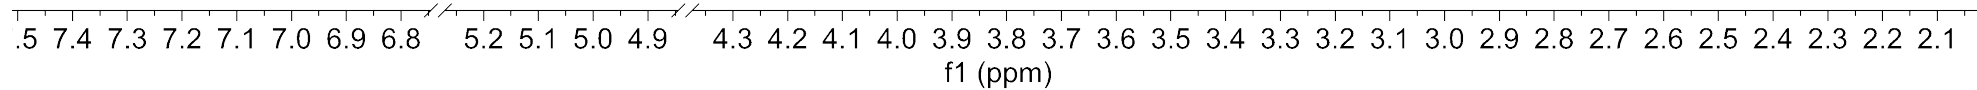

OMe<sub>1</sub>

f1 (ppm)

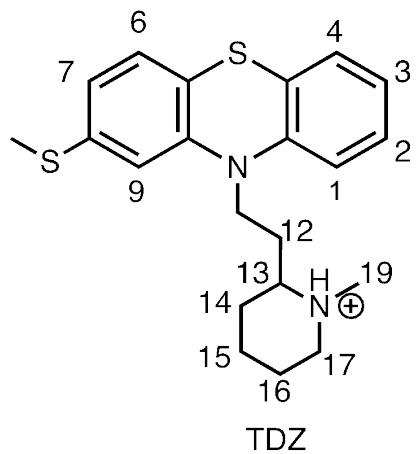

thioridazine.1.fid  
10mM Thioridazine in D2O

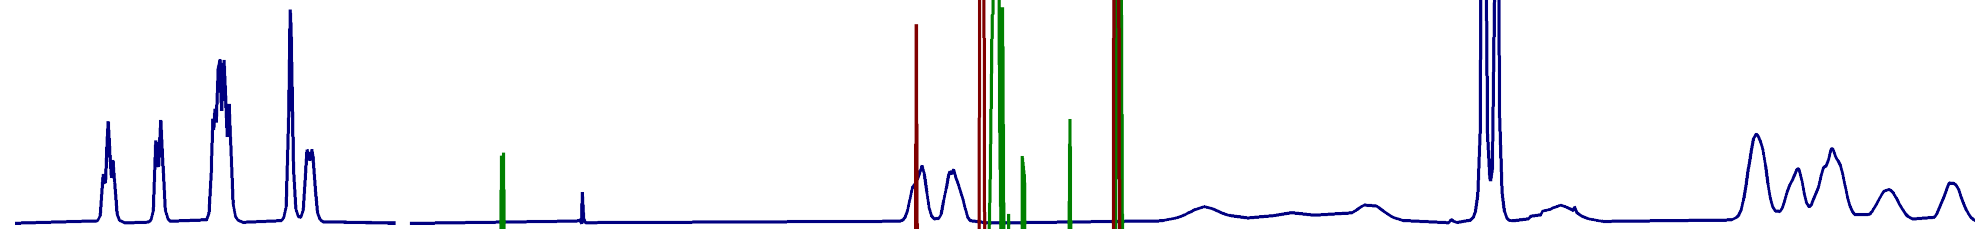

O-6Me-BCD-Phenothiazine.7.fid  
O-6Me-BCD: TDZ 6mM:4mM

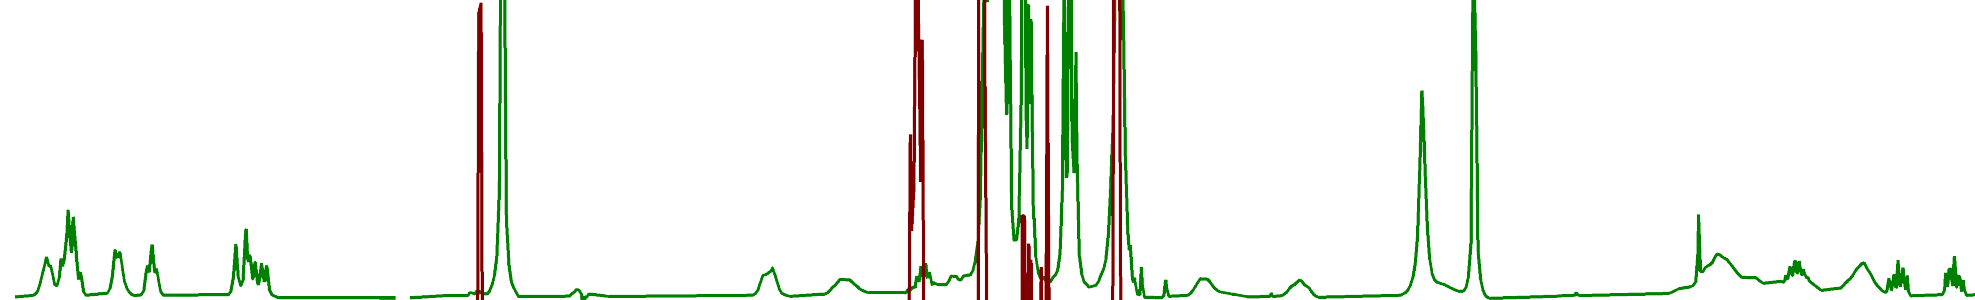

O-6M-BCD.1.fid  
Heptakis-(6-O-methyl)-BCD 10mM

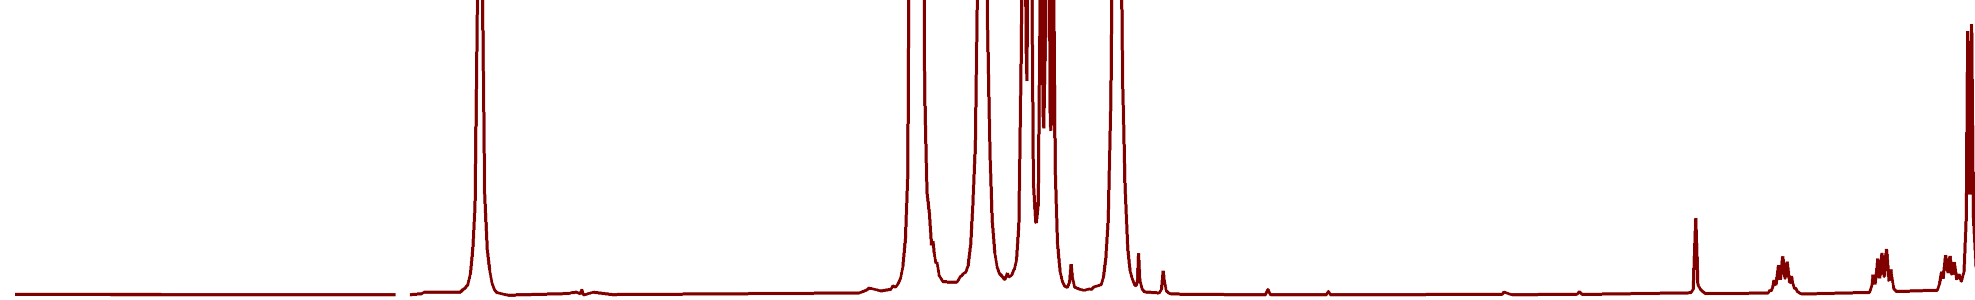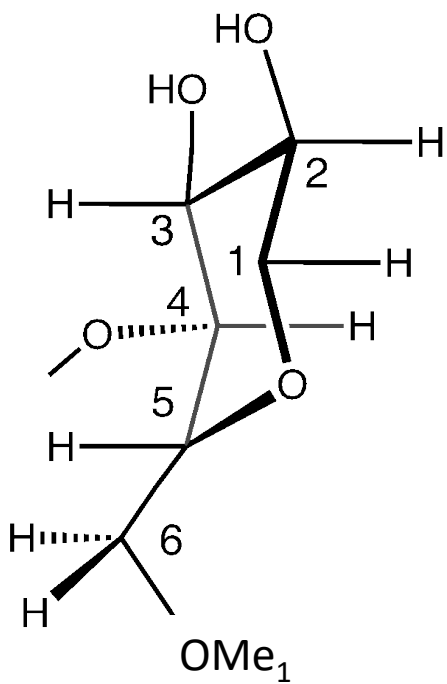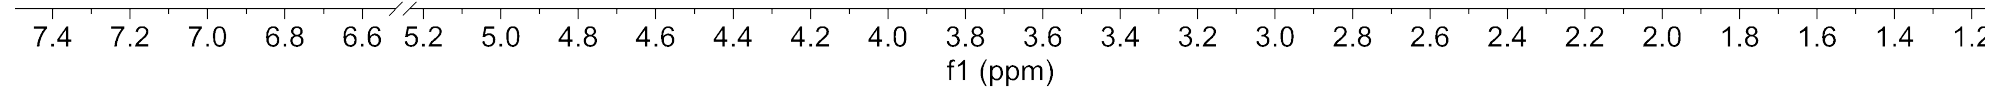

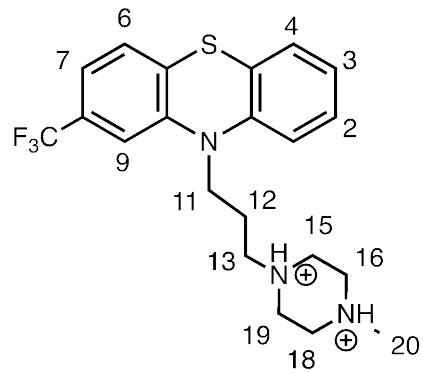

TFP

Trifluoperazine.1.fid  
10mM Trifluoperazine in D2O

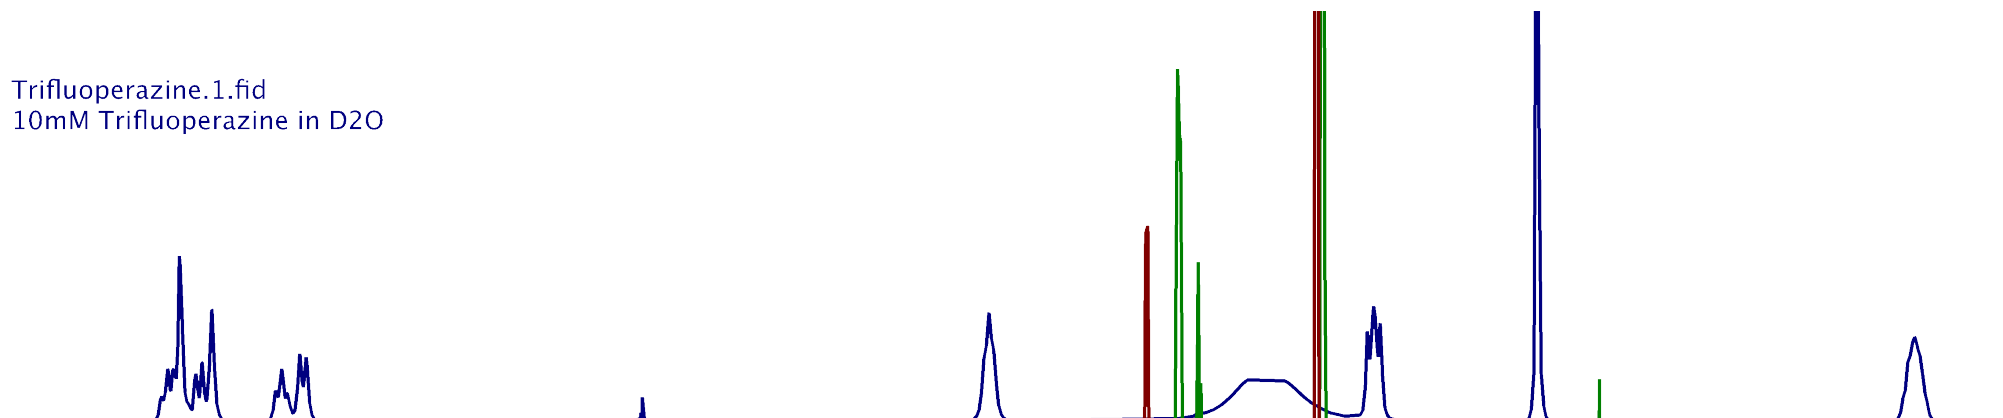

O-6Me-BCD-Phenothiazine.9.fid  
O-6Me-BCD: TFP 6mM:4mM

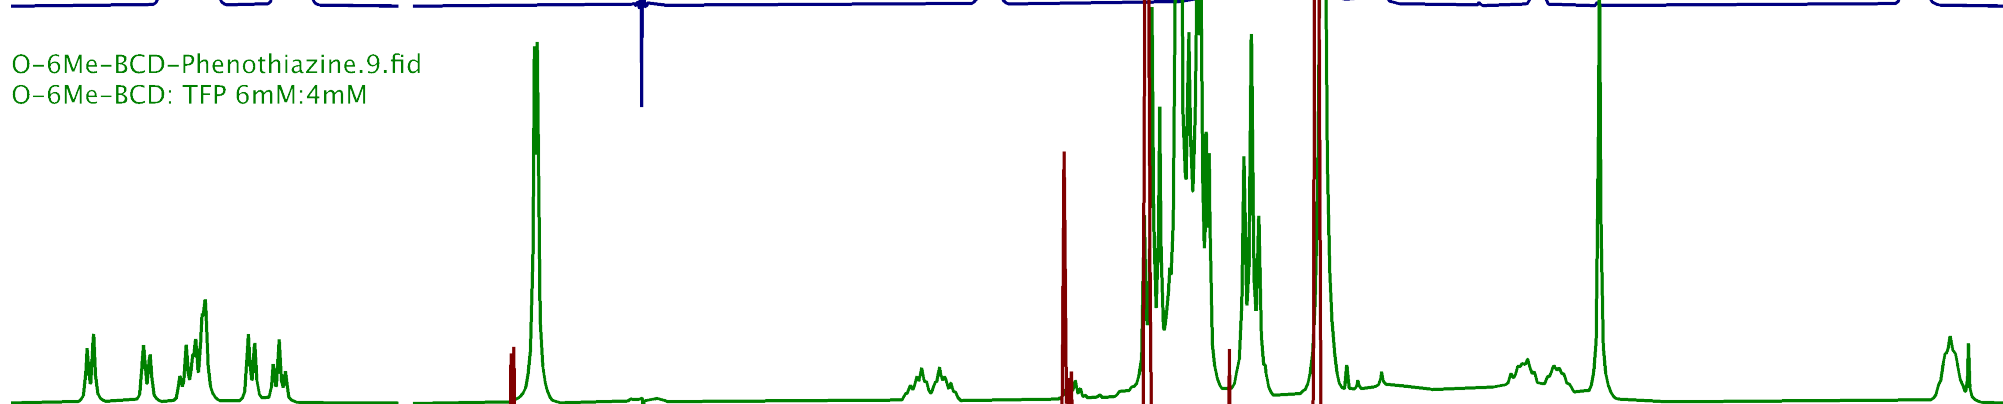

O-6M-BCD.1.fid  
Heptakis-(6-O-methyl)-BCD 10mM

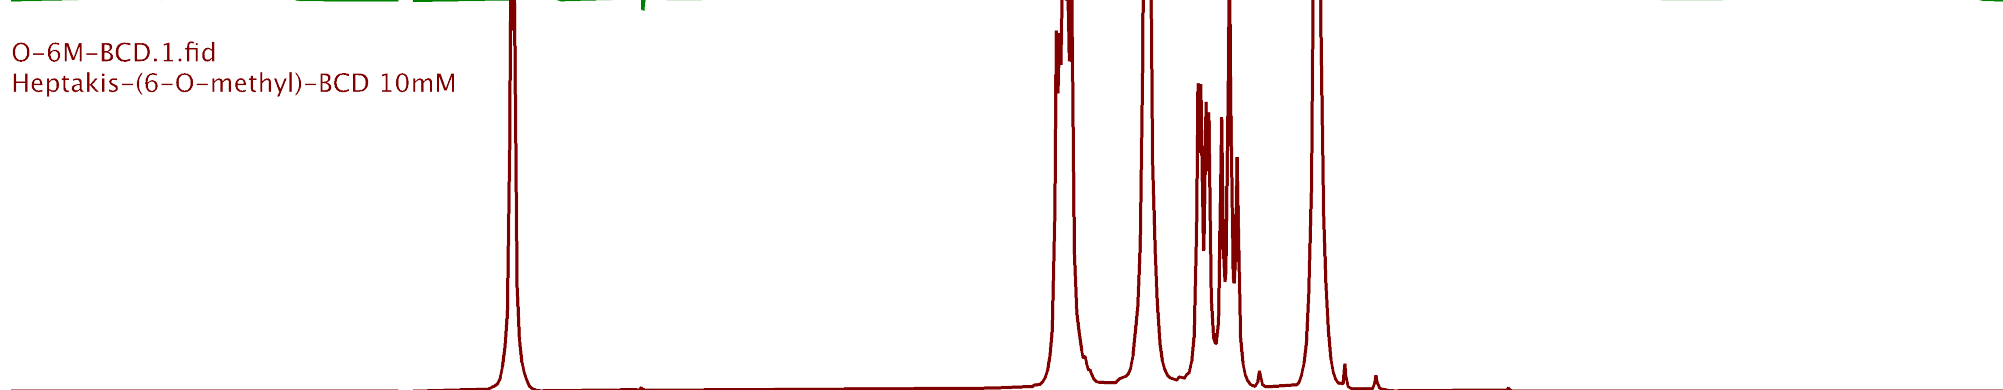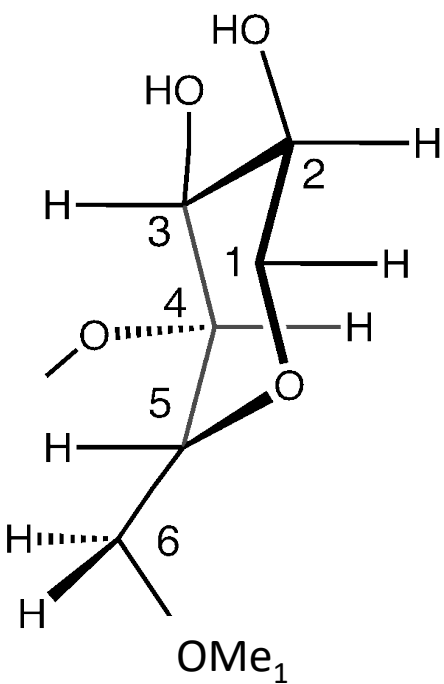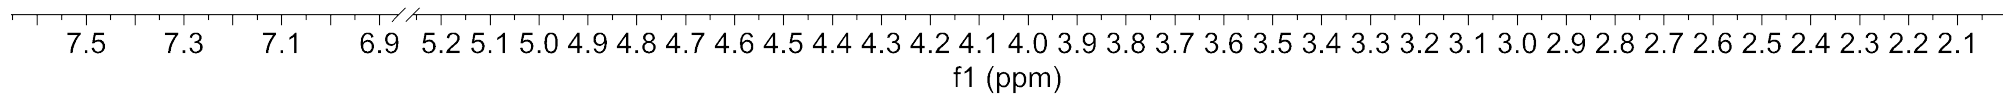

# $^1\text{H}$ NMR of DM- $\beta$ -CD with Phenothiazines



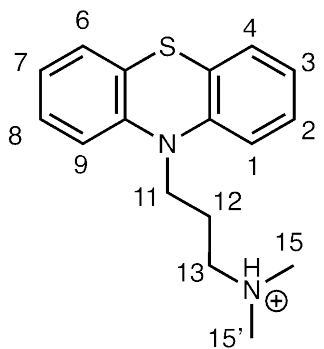

PMZ

promethazine.1.fid  
10mM Promethazine in D2O

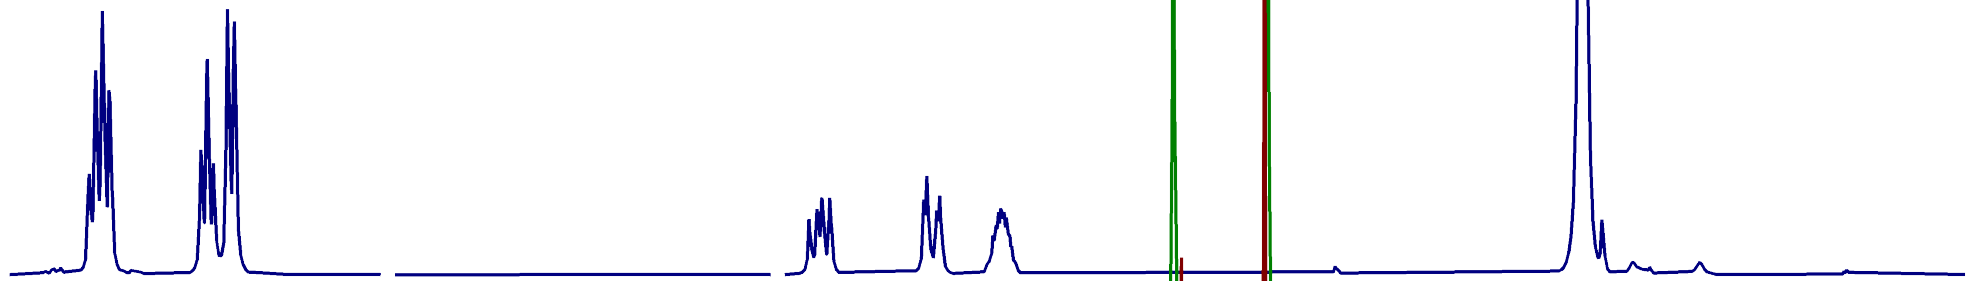

PMT-H26-BCD-NOSEY.1.fid

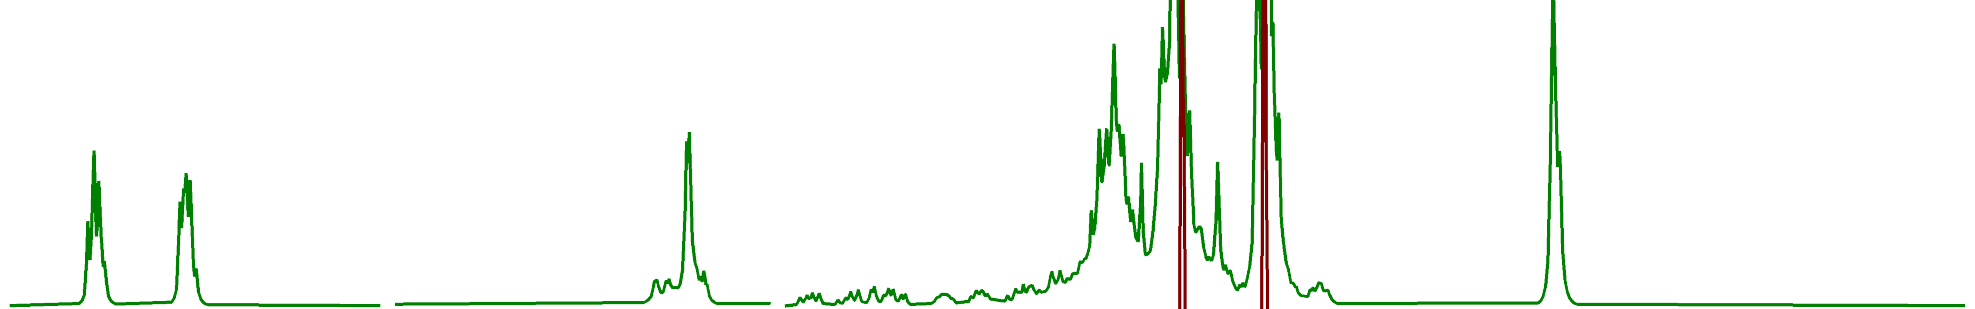

H26DM-BCD.1.fid  
Heptakis-(2,6-dimethyl)-BCD 10mM

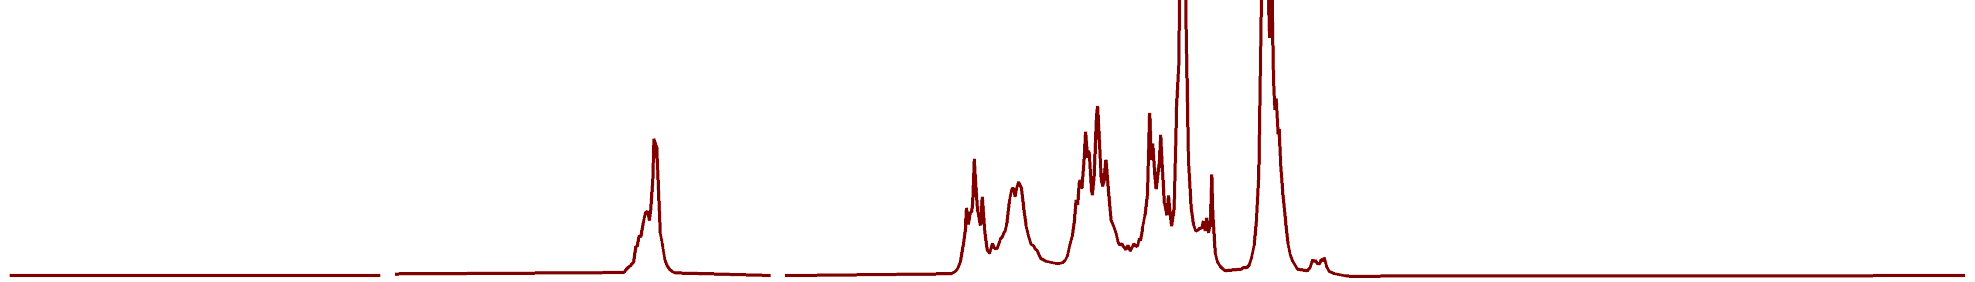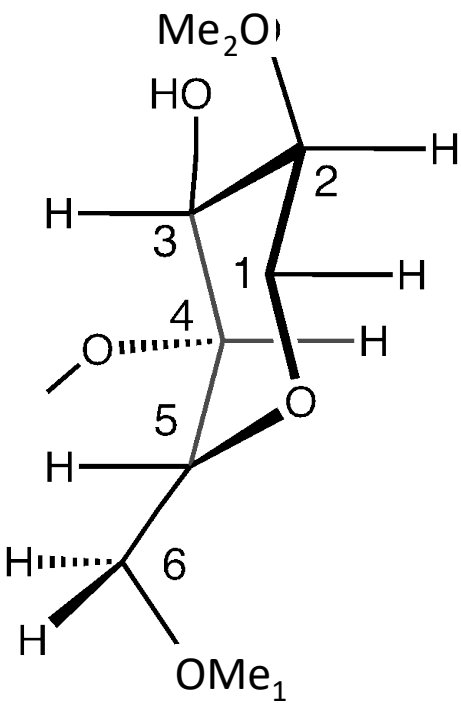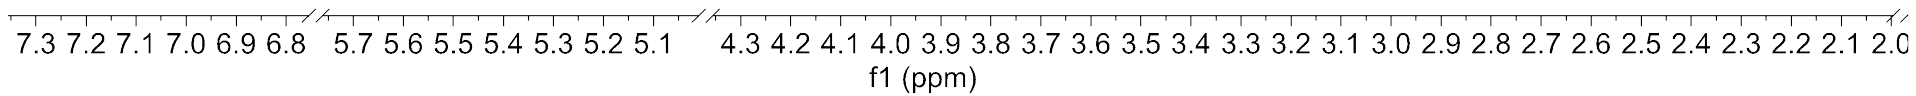

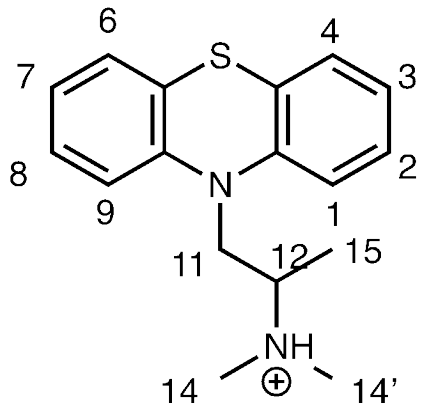

promethazine.1.fid  
10mM Promethazine in D2O

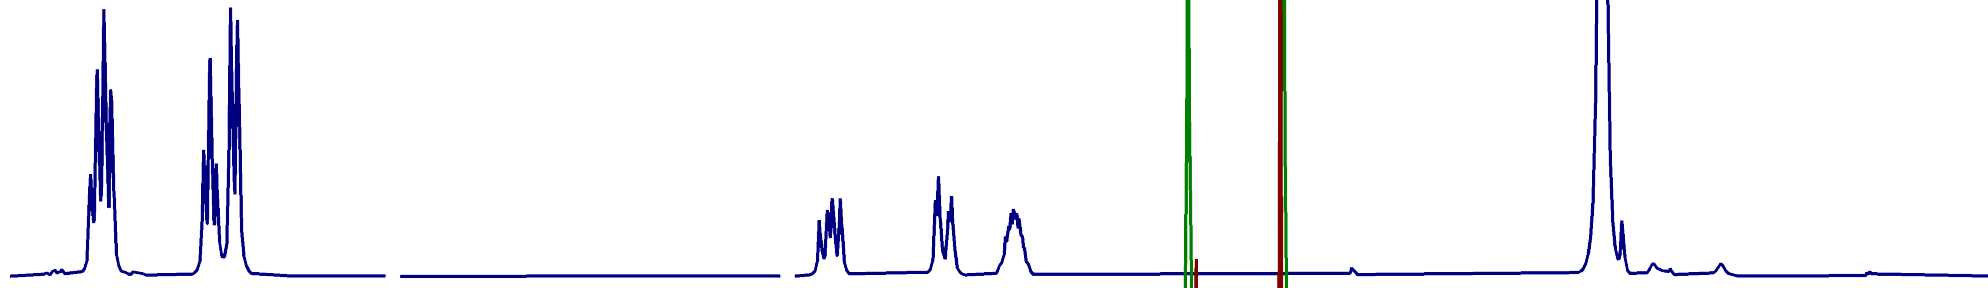

PMT-H26-BCD-NOSEY.1.fid

PMT

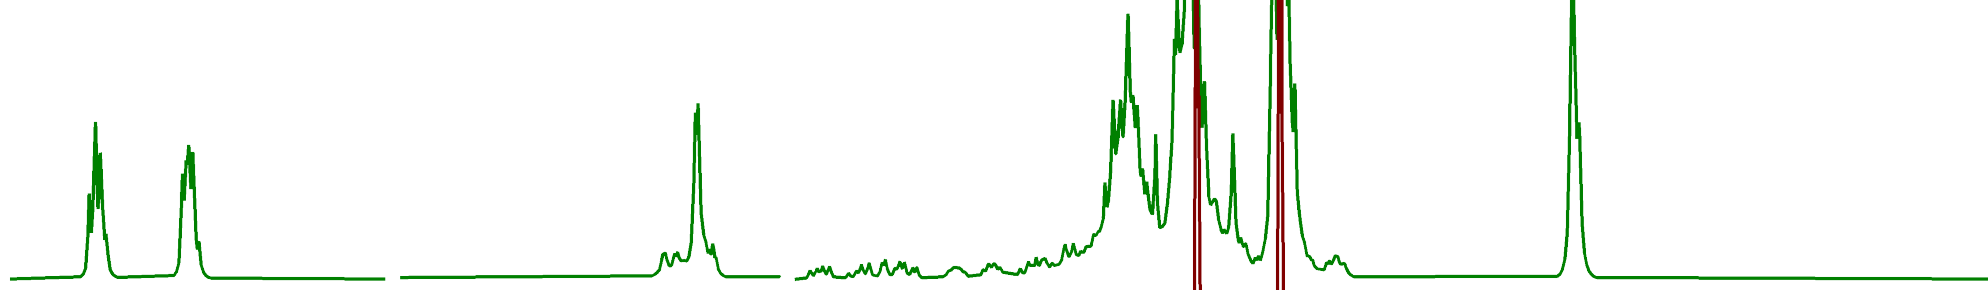

H26DM-BCD.1.fid  
Heptakis-(2,6-dimethyl)-BCD 10mM

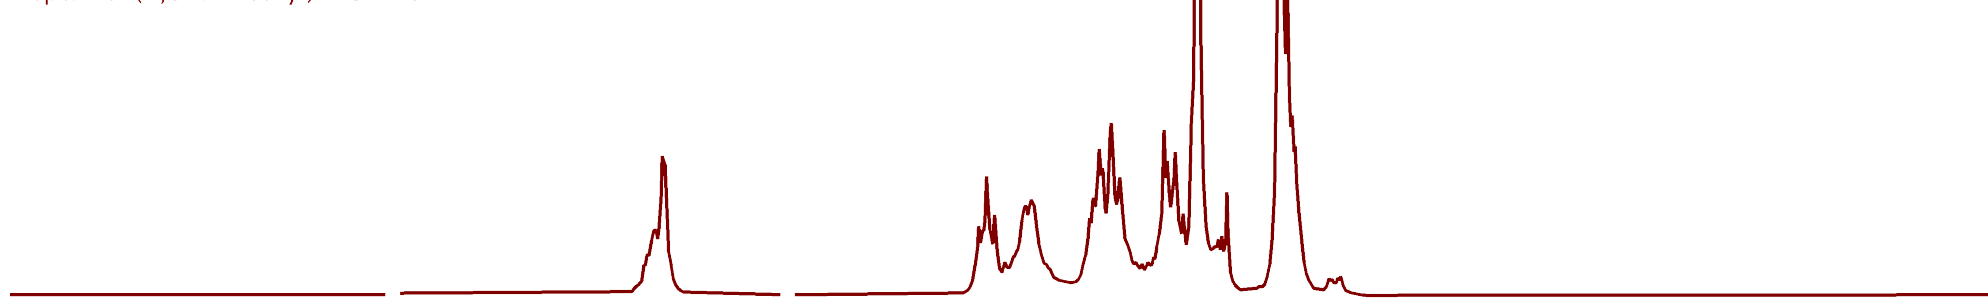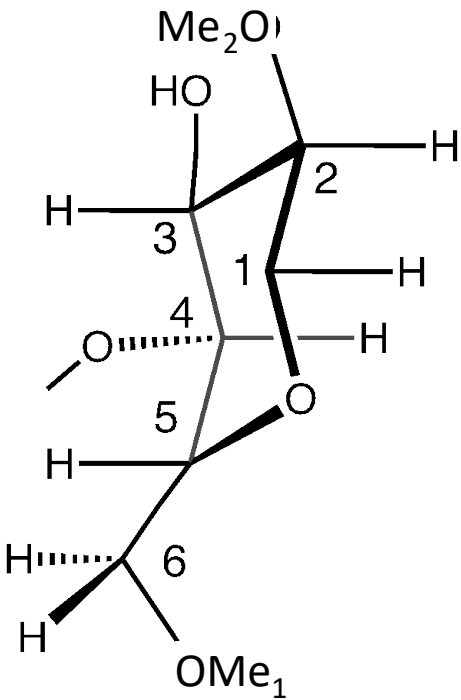

7.3 7.2 7.1 7.0 6.9 6.8 5.7 5.6 5.5 5.4 5.3 5.2 5.1 4.3 4.2 4.1 4.0 3.9 3.8 3.7 3.6 3.5 3.4 3.3 3.2 3.1 3.0 2.9 2.8 2.7 2.6 2.5 2.4 2.3 2.2 2.1 2.0  
f1 (ppm)

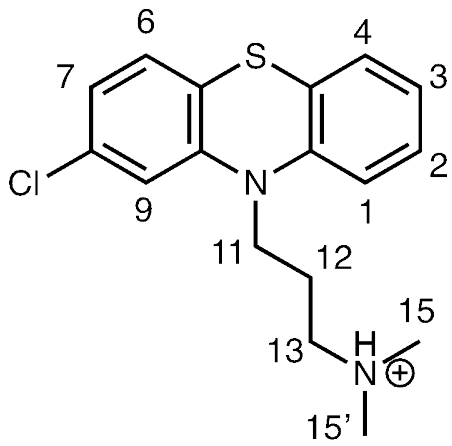

CPZ

Chlorpromazine.1.fid  
10mM Chlorpromazine in D2O

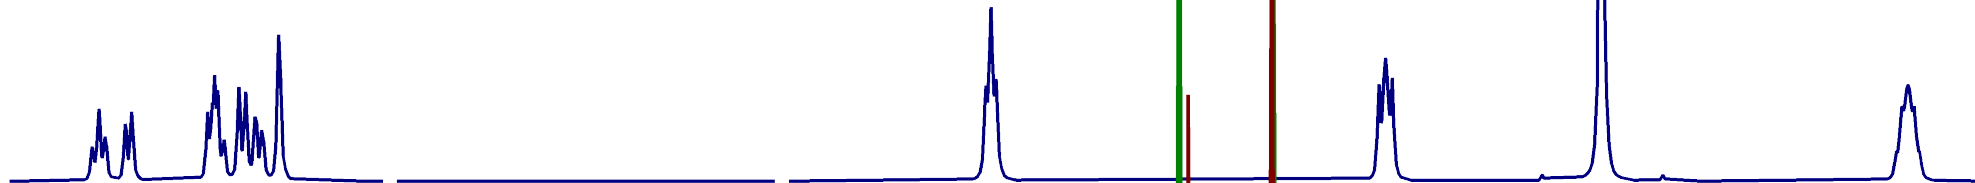

CPZ-H26DM-BCD.1.fid

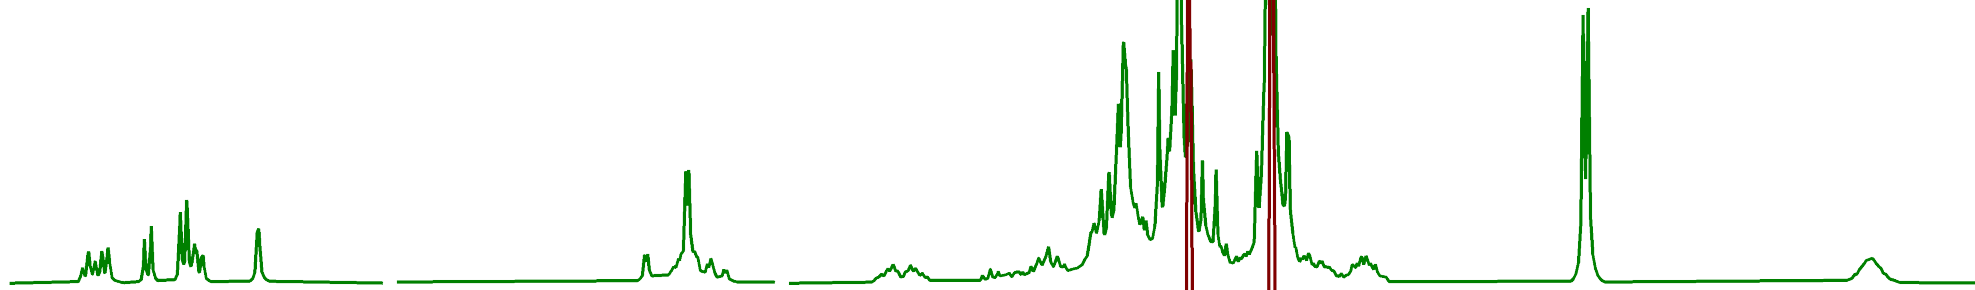

H26DM-BCD.1.fid  
Heptakis-(2,6-dimethyl)-BCD 10mM

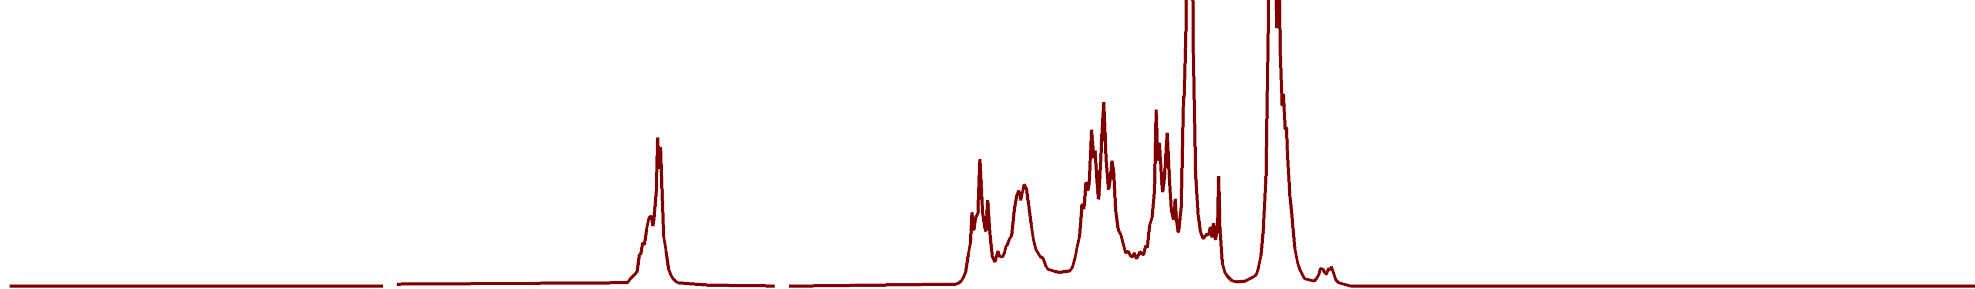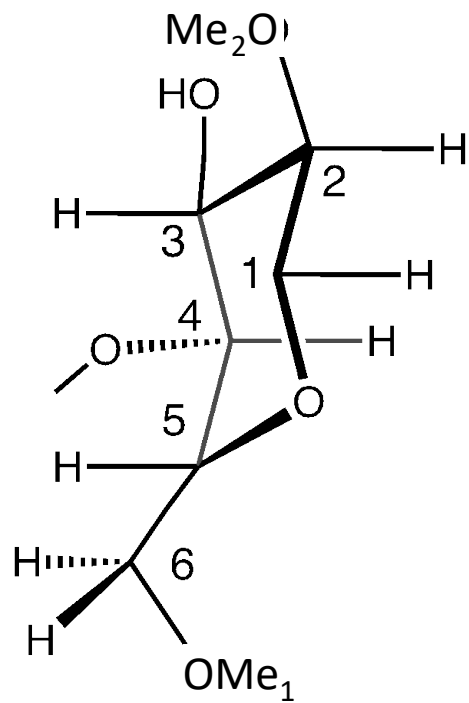

7.3 7.2 7.1 7.0 6.9 6.8 // 5.7 5.6 5.5 5.4 5.3 5.2 5.1 // 4.3 4.2 4.1 4.0 3.9 3.8 3.7 3.6 3.5 3.4 3.3 3.2 3.1 3.0 2.9 2.8 2.7 2.6 2.5 2.4 2.3 2.2 2.1 2.  
f1 (ppm)

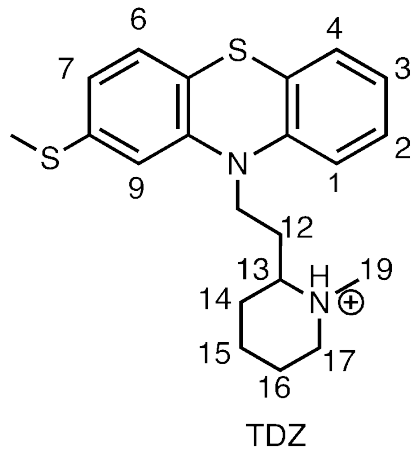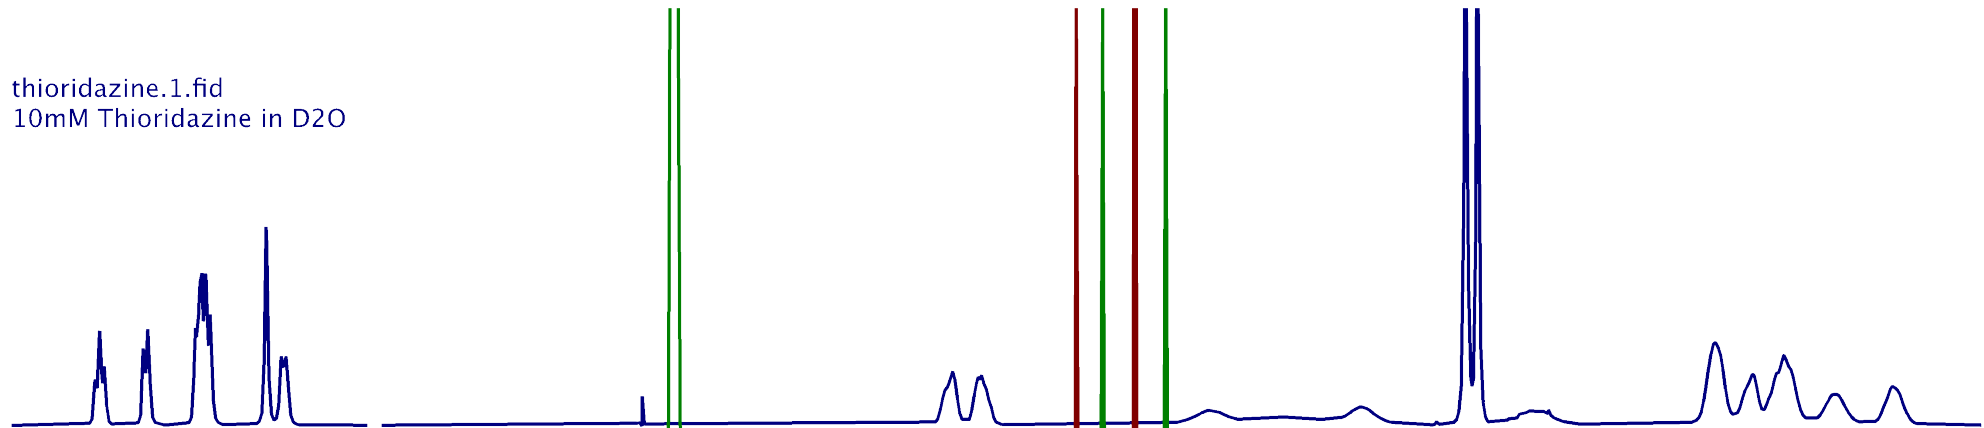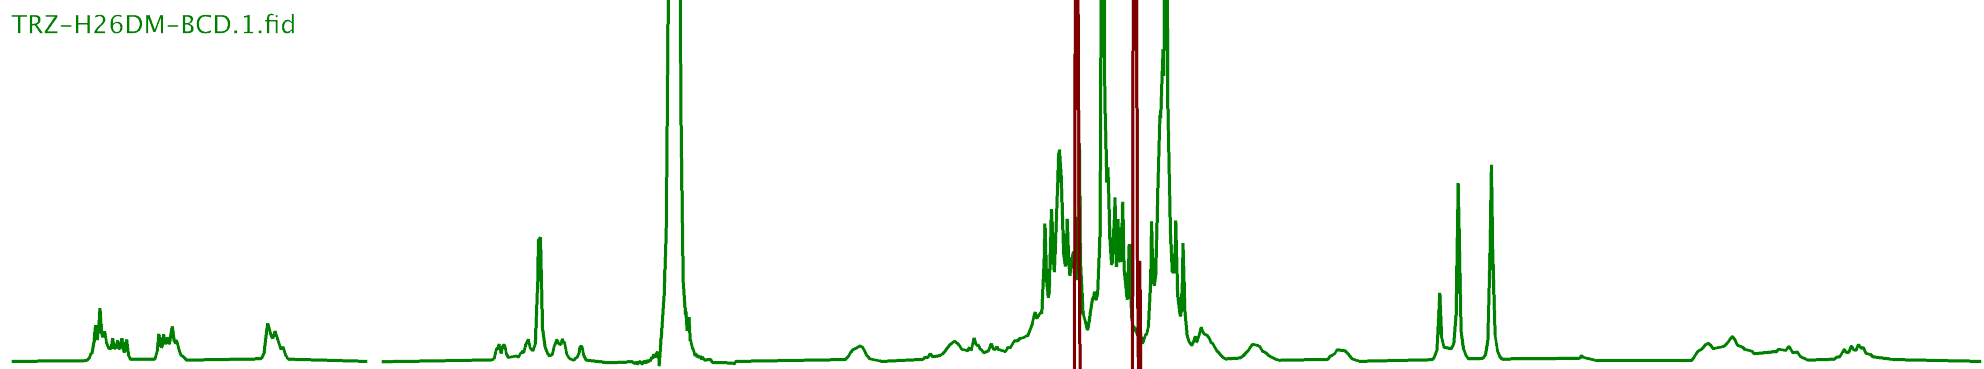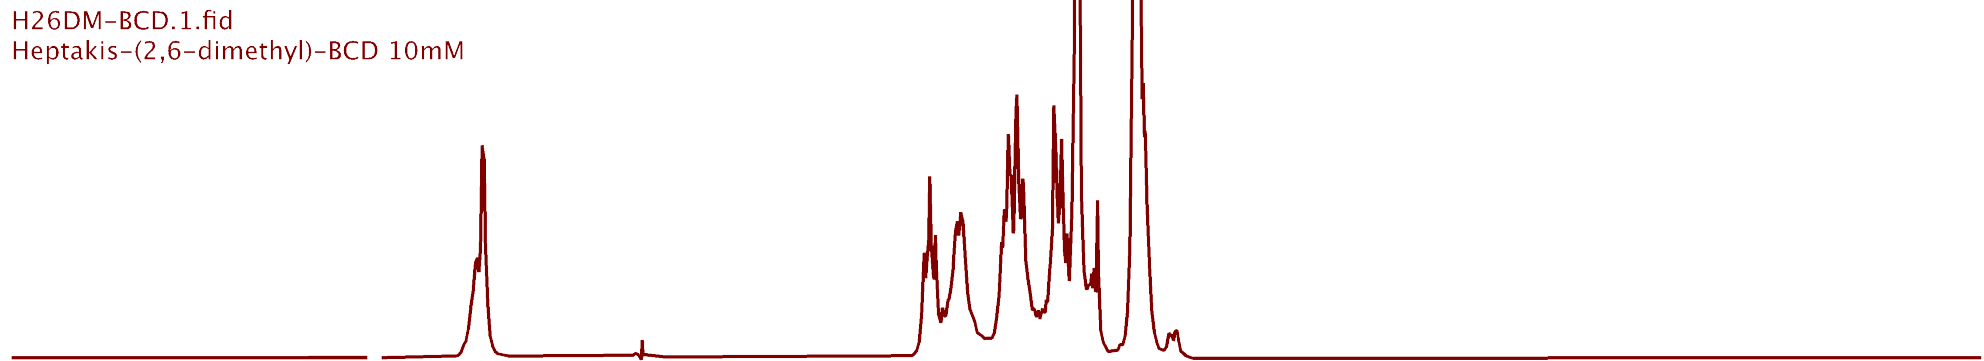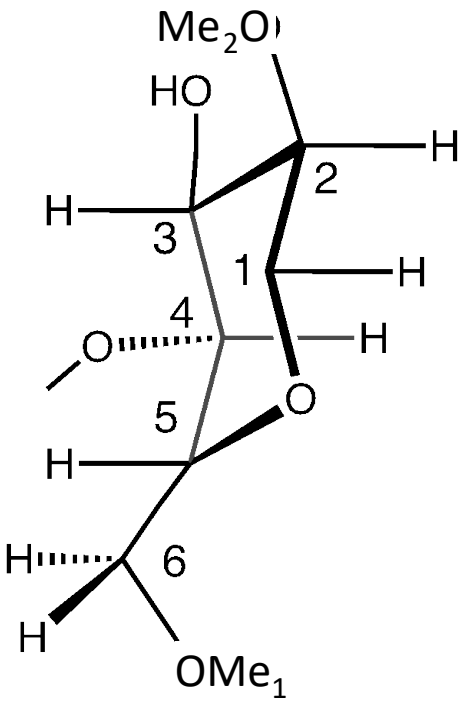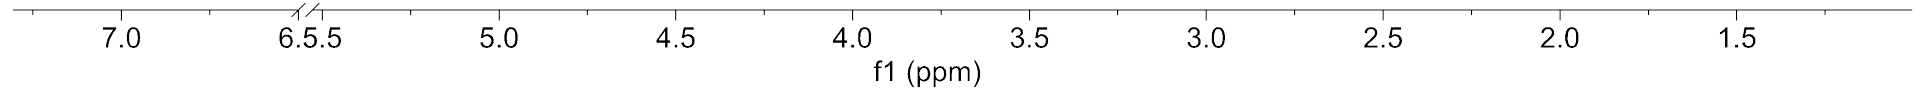

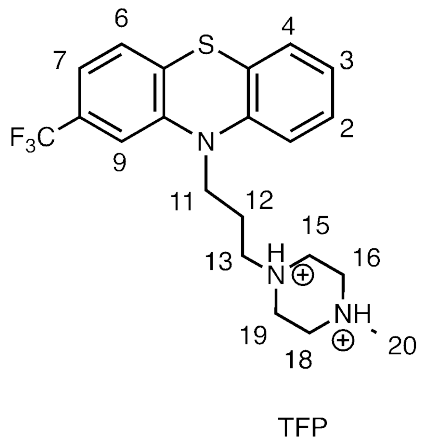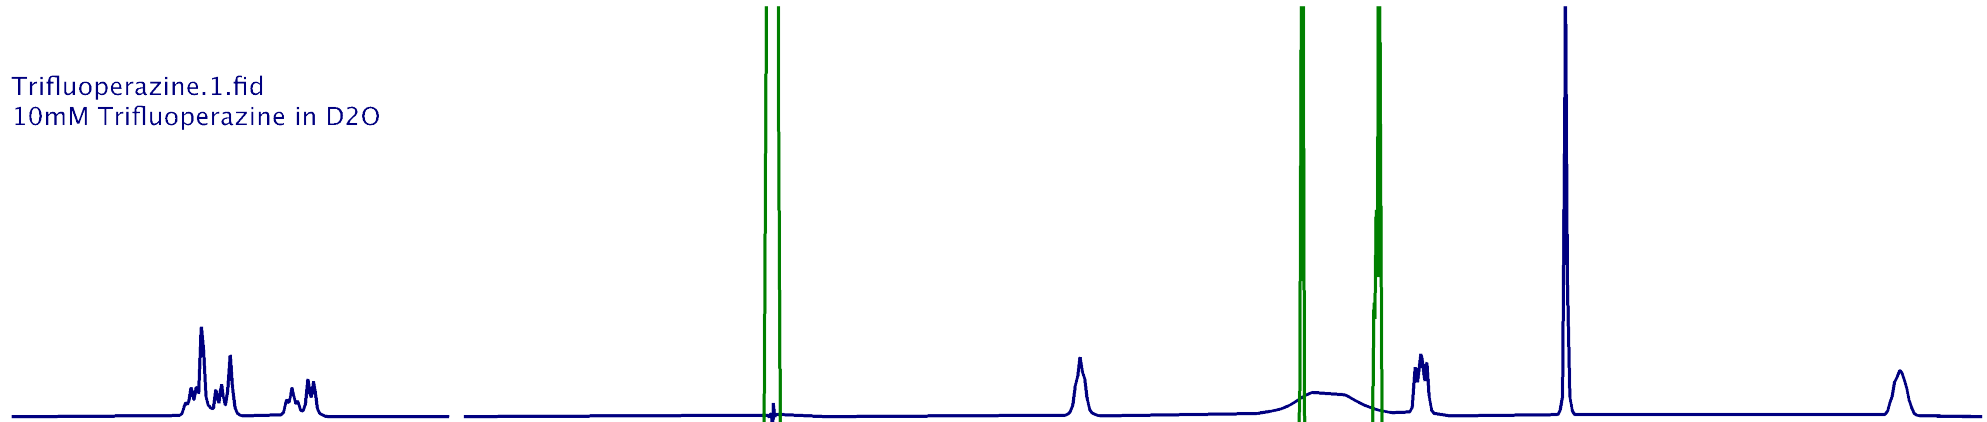

TFP-H26DM-BCD.1.fid

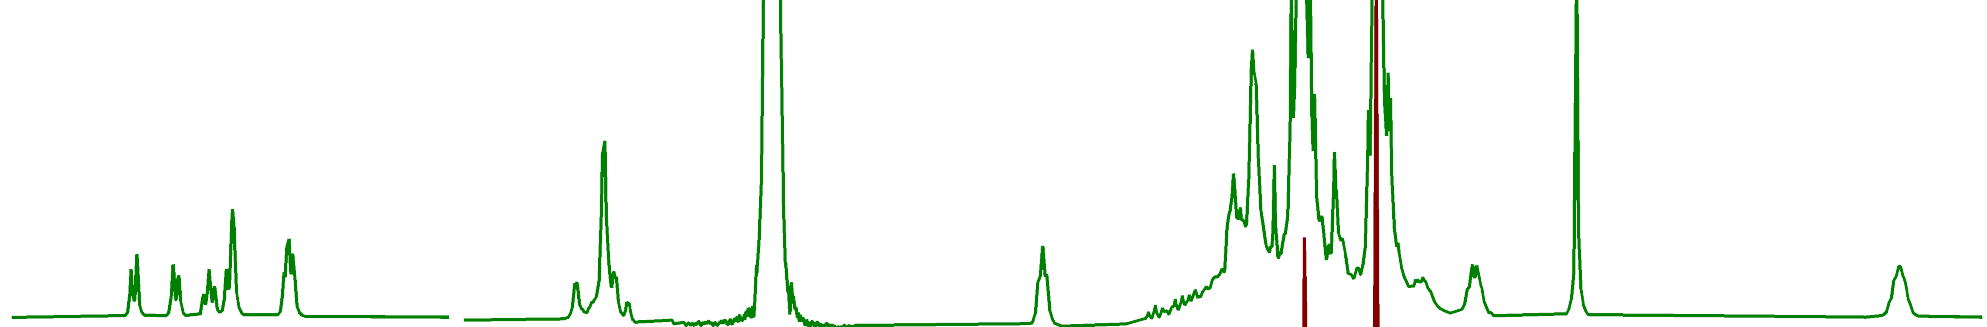

H26DM-BCD.1.fid  
Heptakis-(2,6-dimethyl)-BCD 10mM

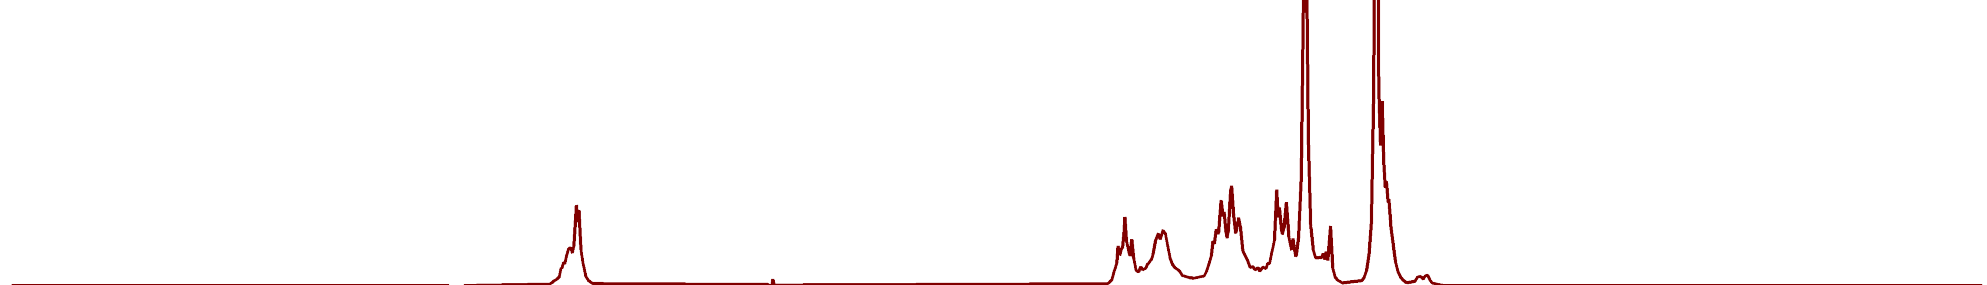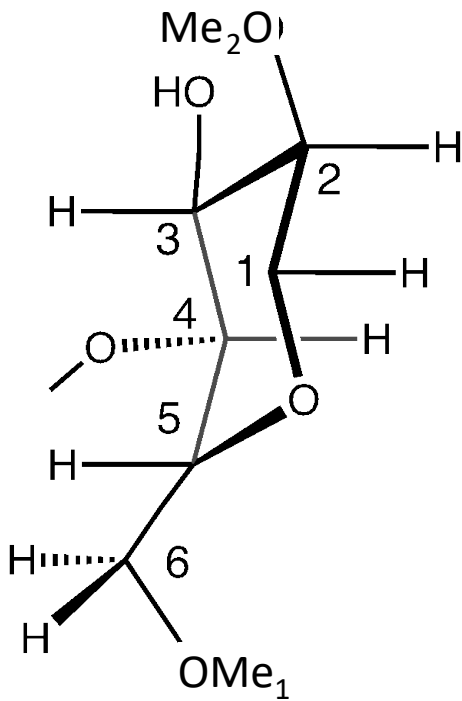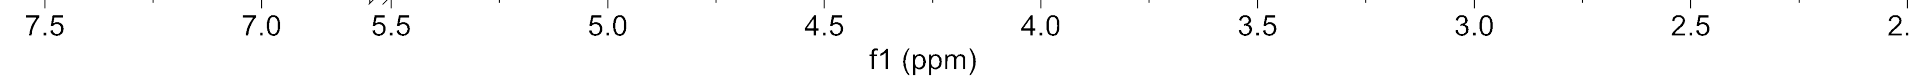

Supplement: d3cp05347d1.pdf [file d3cp05347d1.pdf]
