# Supplementary material for: Host–guest systems for the SAMPL9 blinded prediction challenge: phenothiazine as a privileged scaffold for binding to cyclodextrins
Source: Royal Society of Chemistry journal article supplement (doi:10.1039/d3cp05347d), 2023-12-13

# Structure-Binding Relationship of Permethylated Cyclodextrins and Phenothiazine Drugs

Andrade, B; Chen, A. and Gilson, M. K.

Skaggs School of Pharmacy and Pharmaceutical Sciences, University of California, San Diego, 9500 Gilman Drive, La Jolla, California  
92093-0751, USA

\*[mgilson@health.ucsd.edu](mailto:mgilson@health.ucsd.edu)

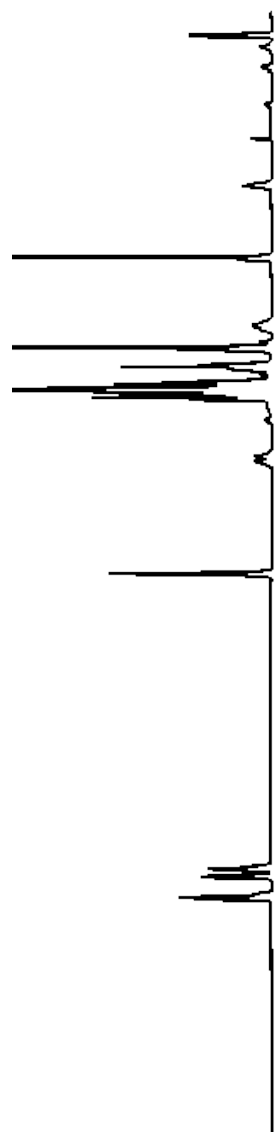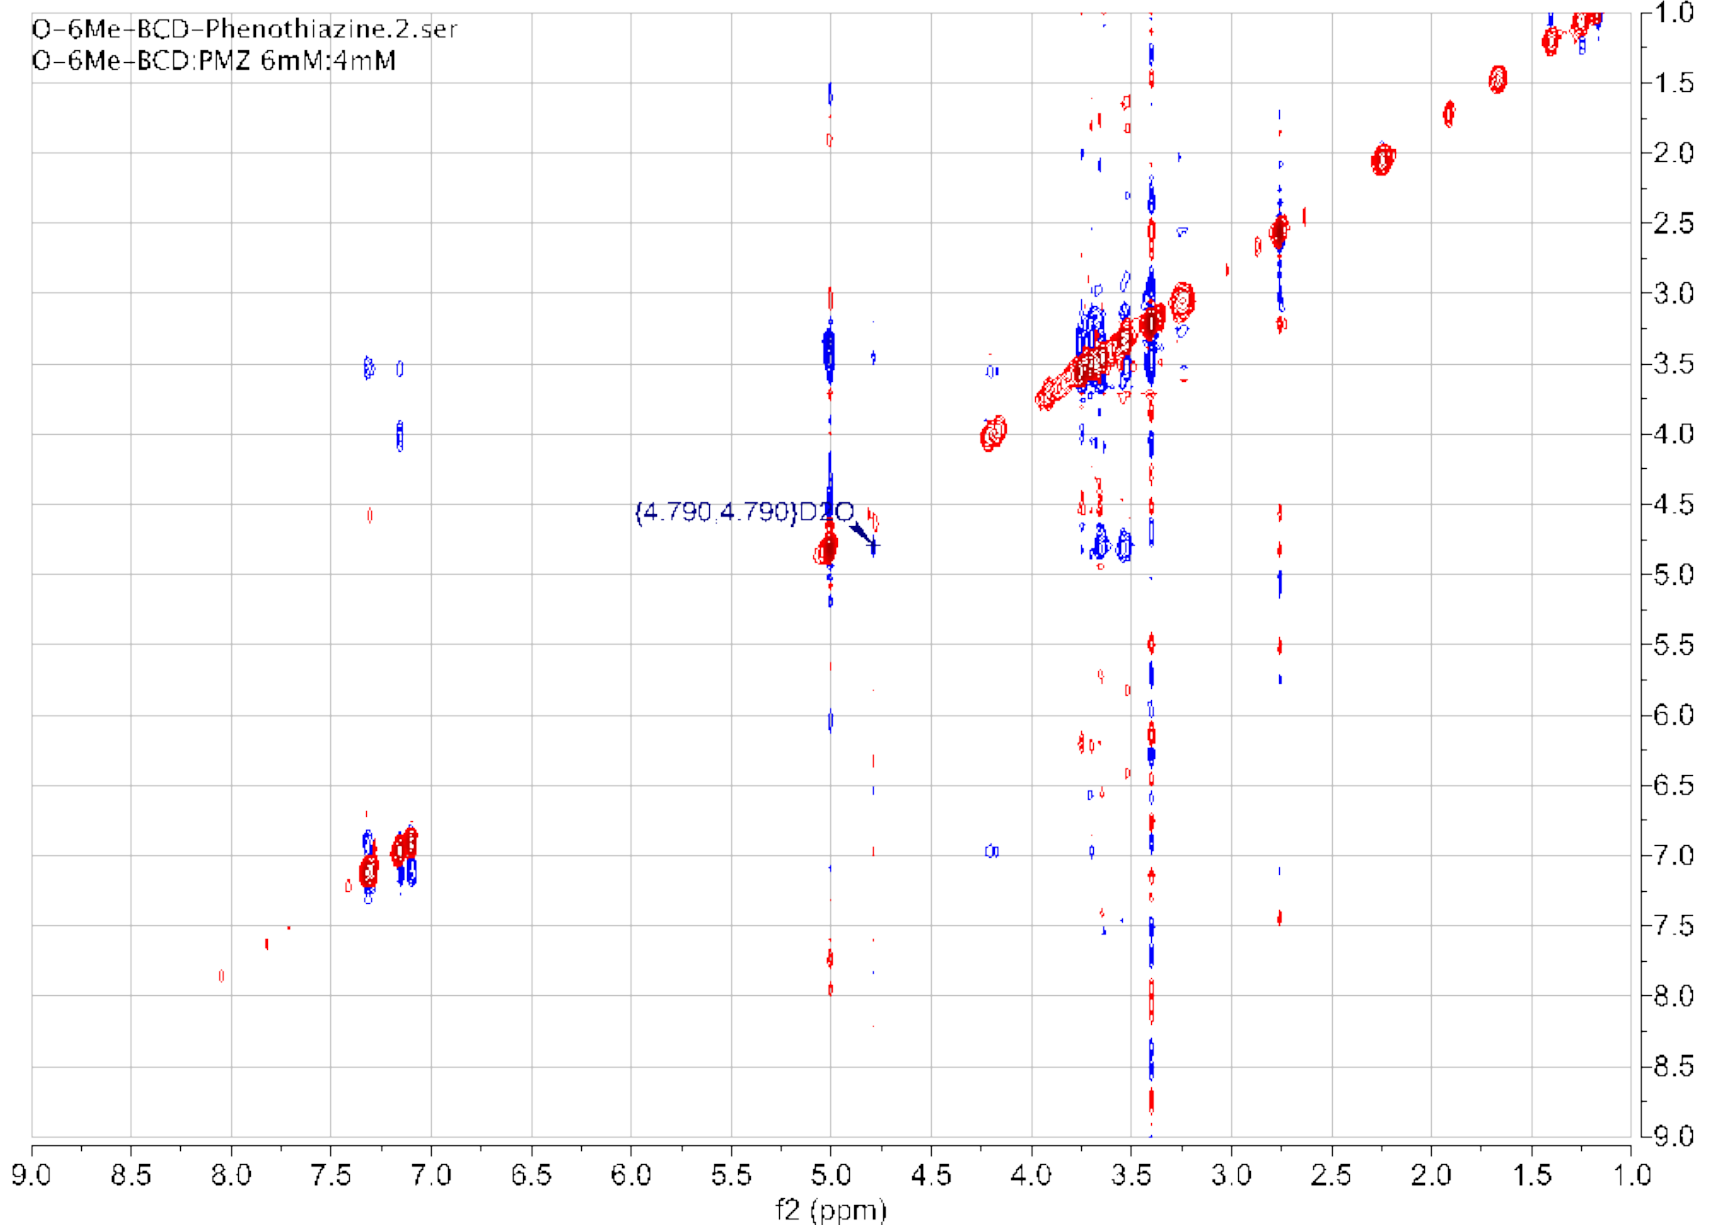

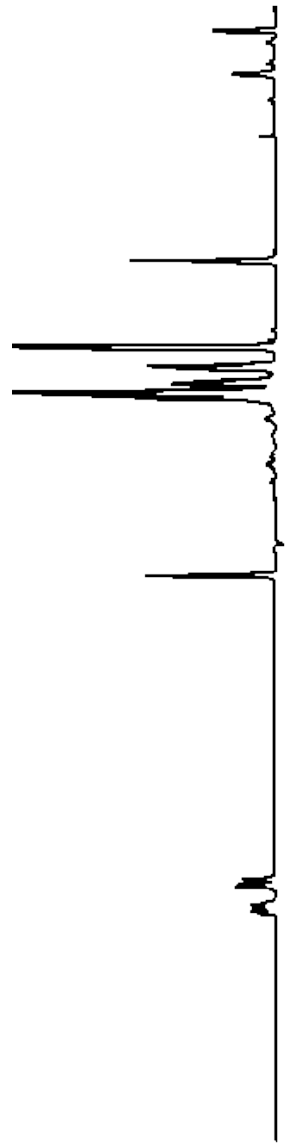

O-6Me-BCD-Phenothiazine.4.ser  
O-6Me-BCD:PMT 6mM:4mM

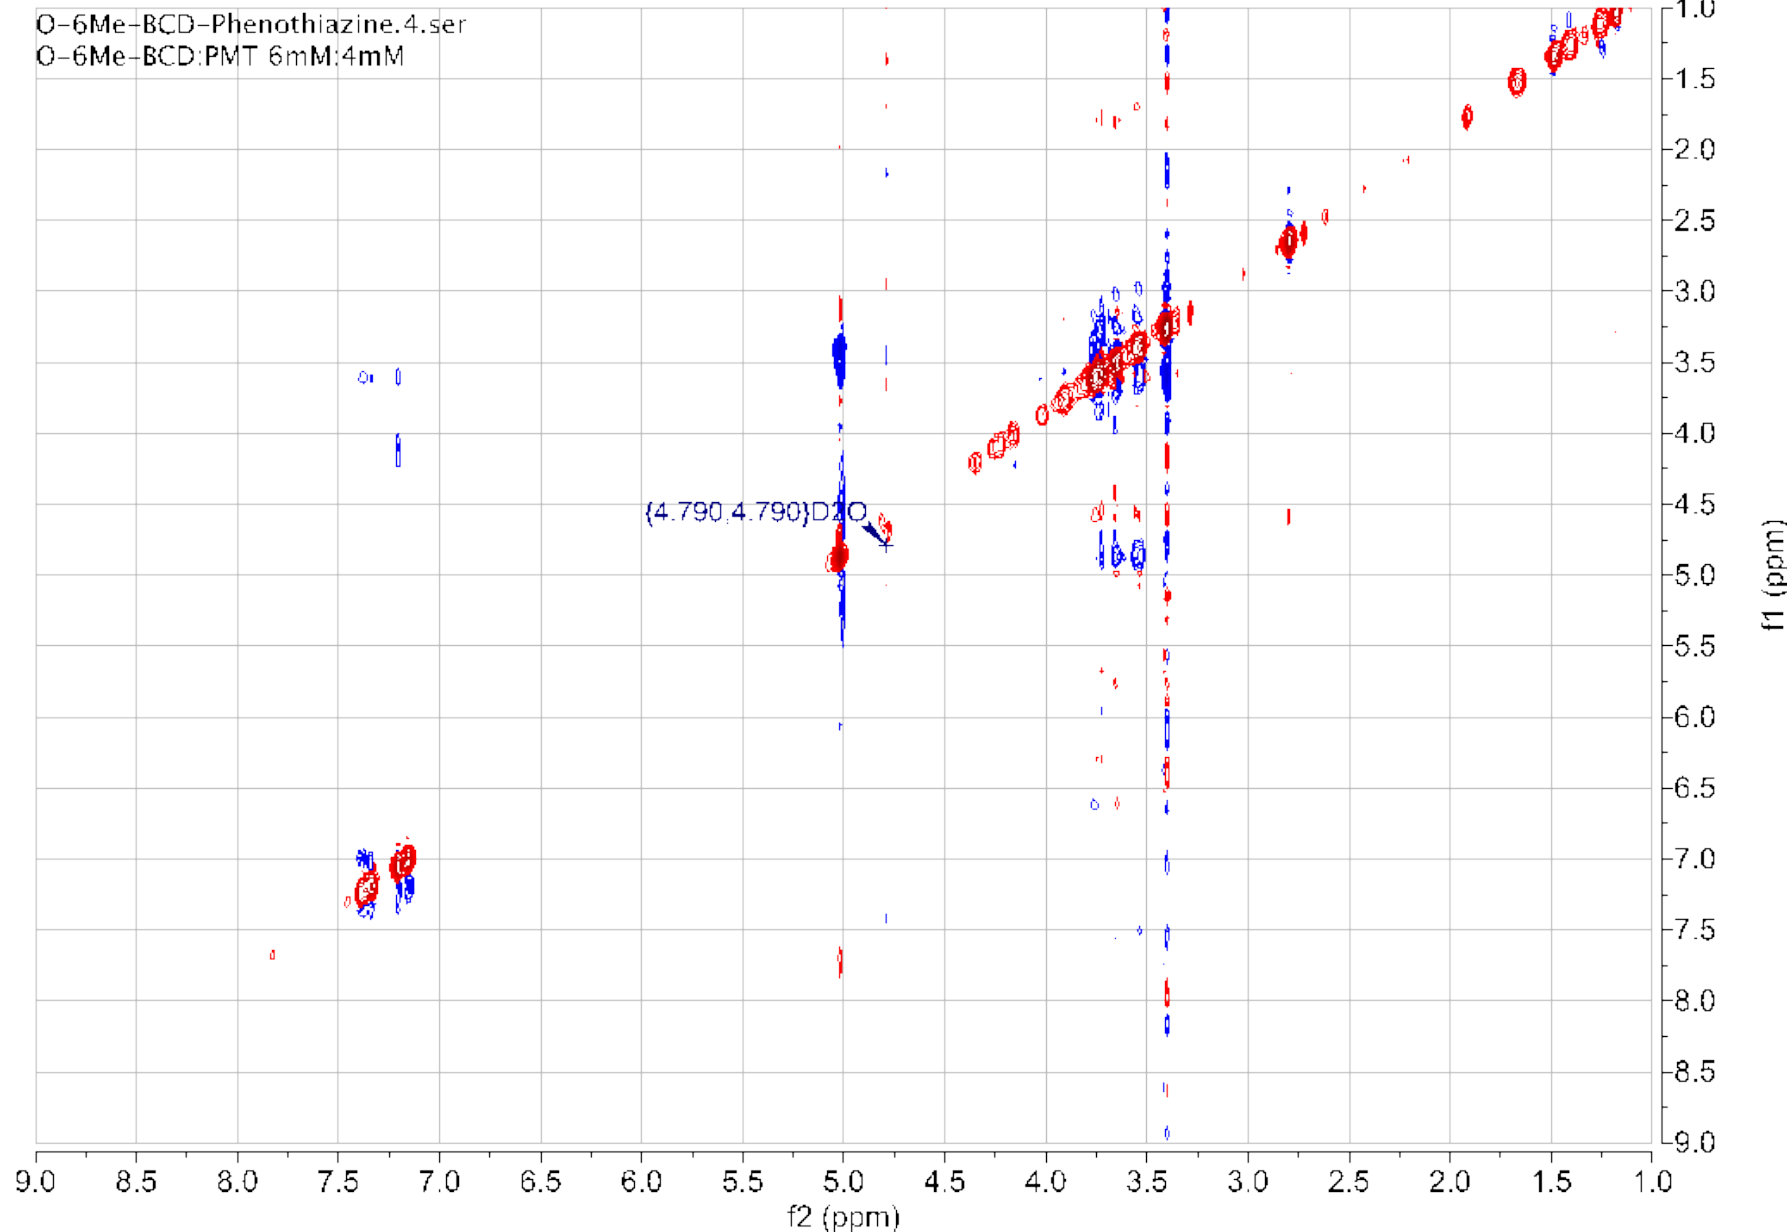

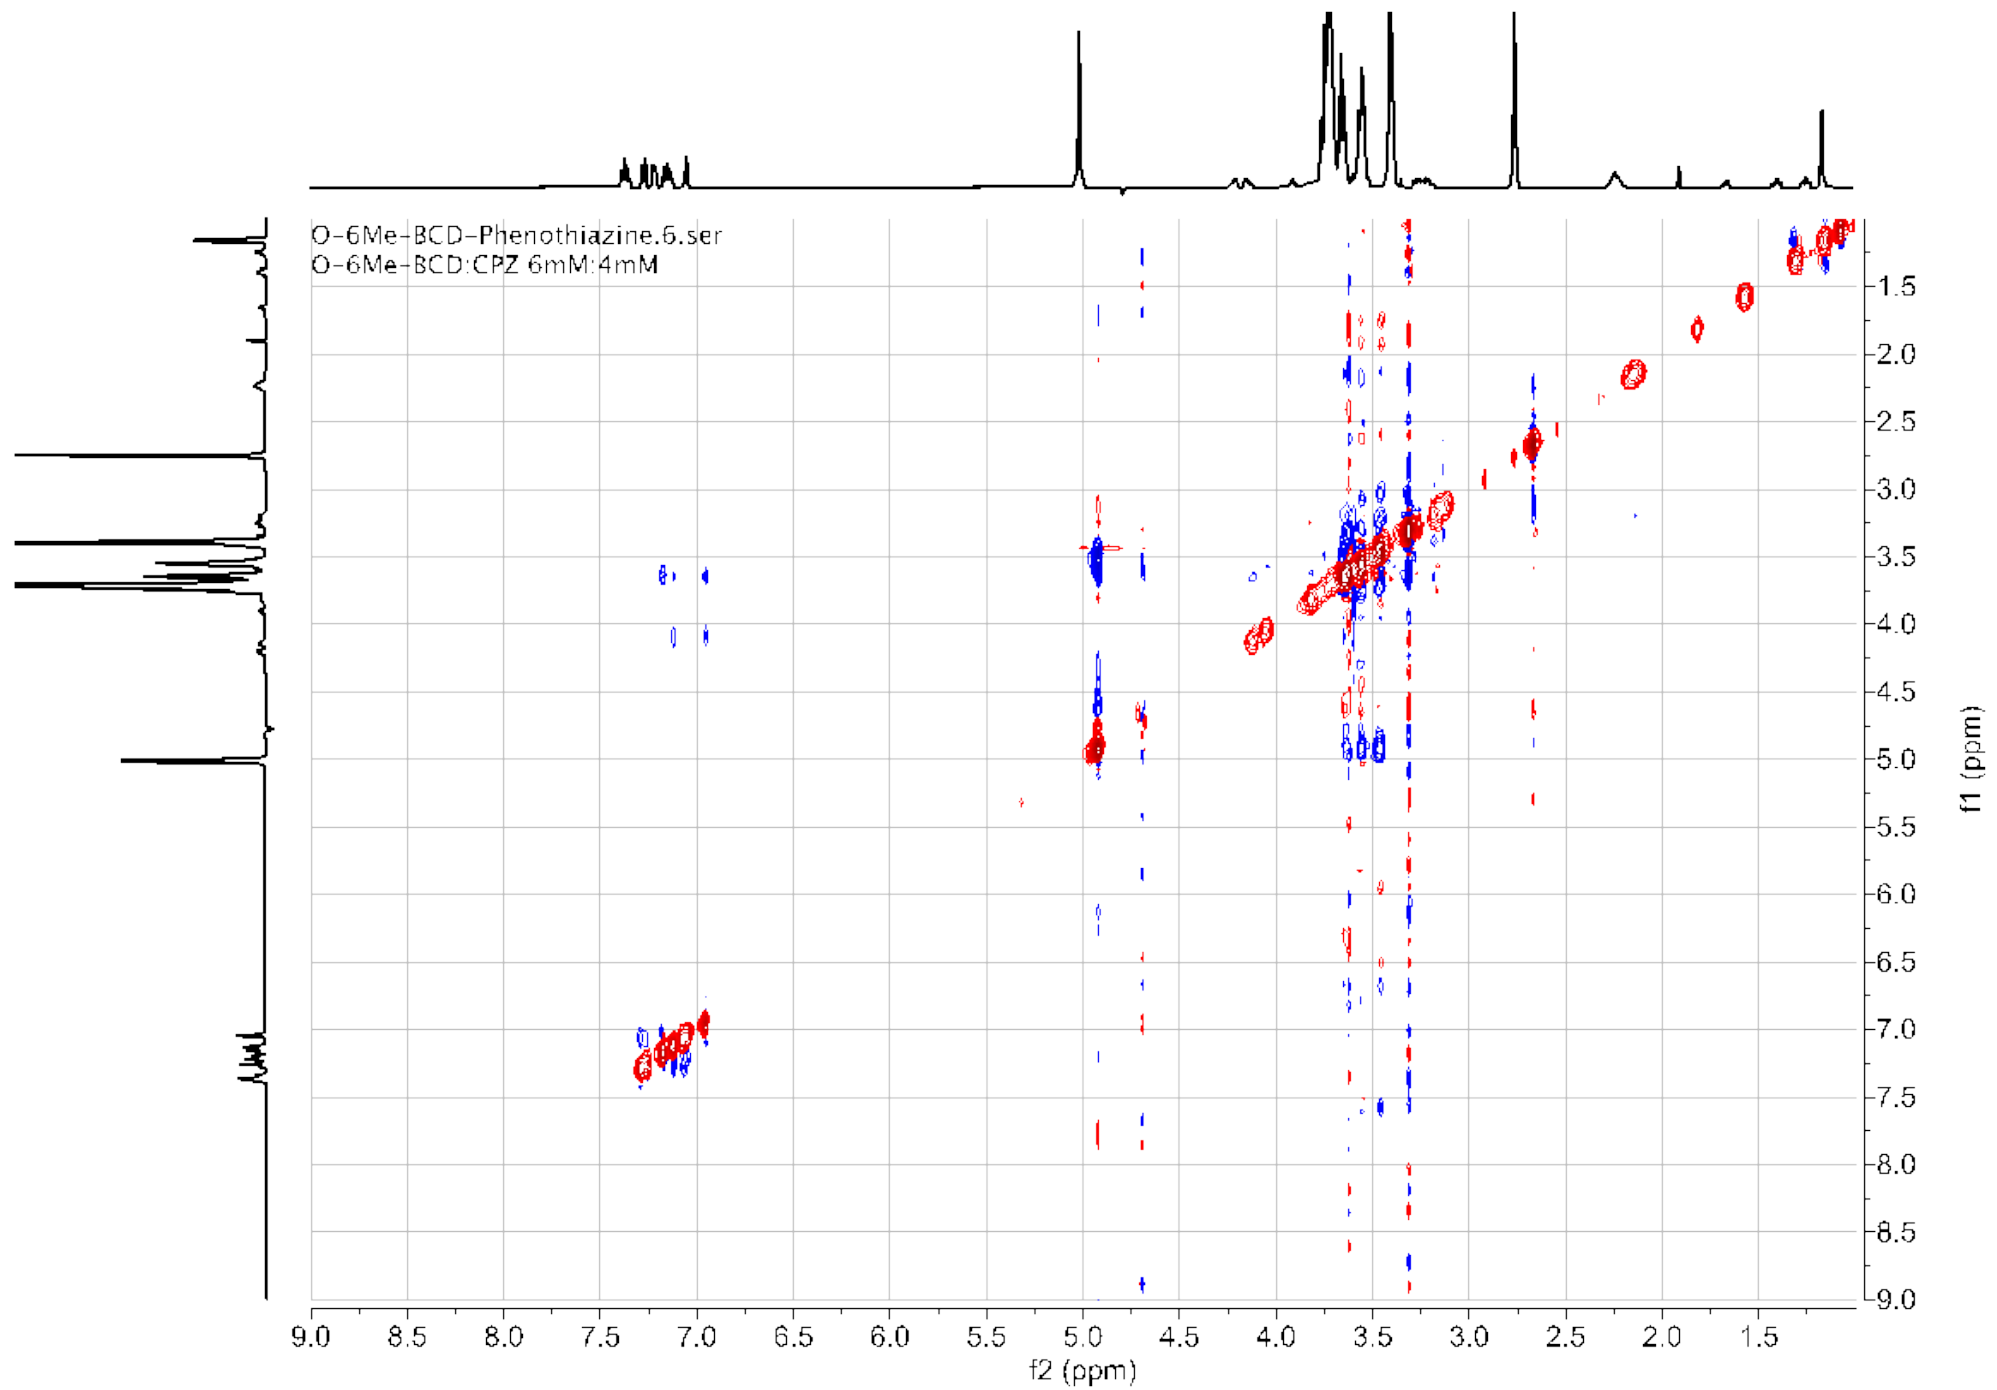

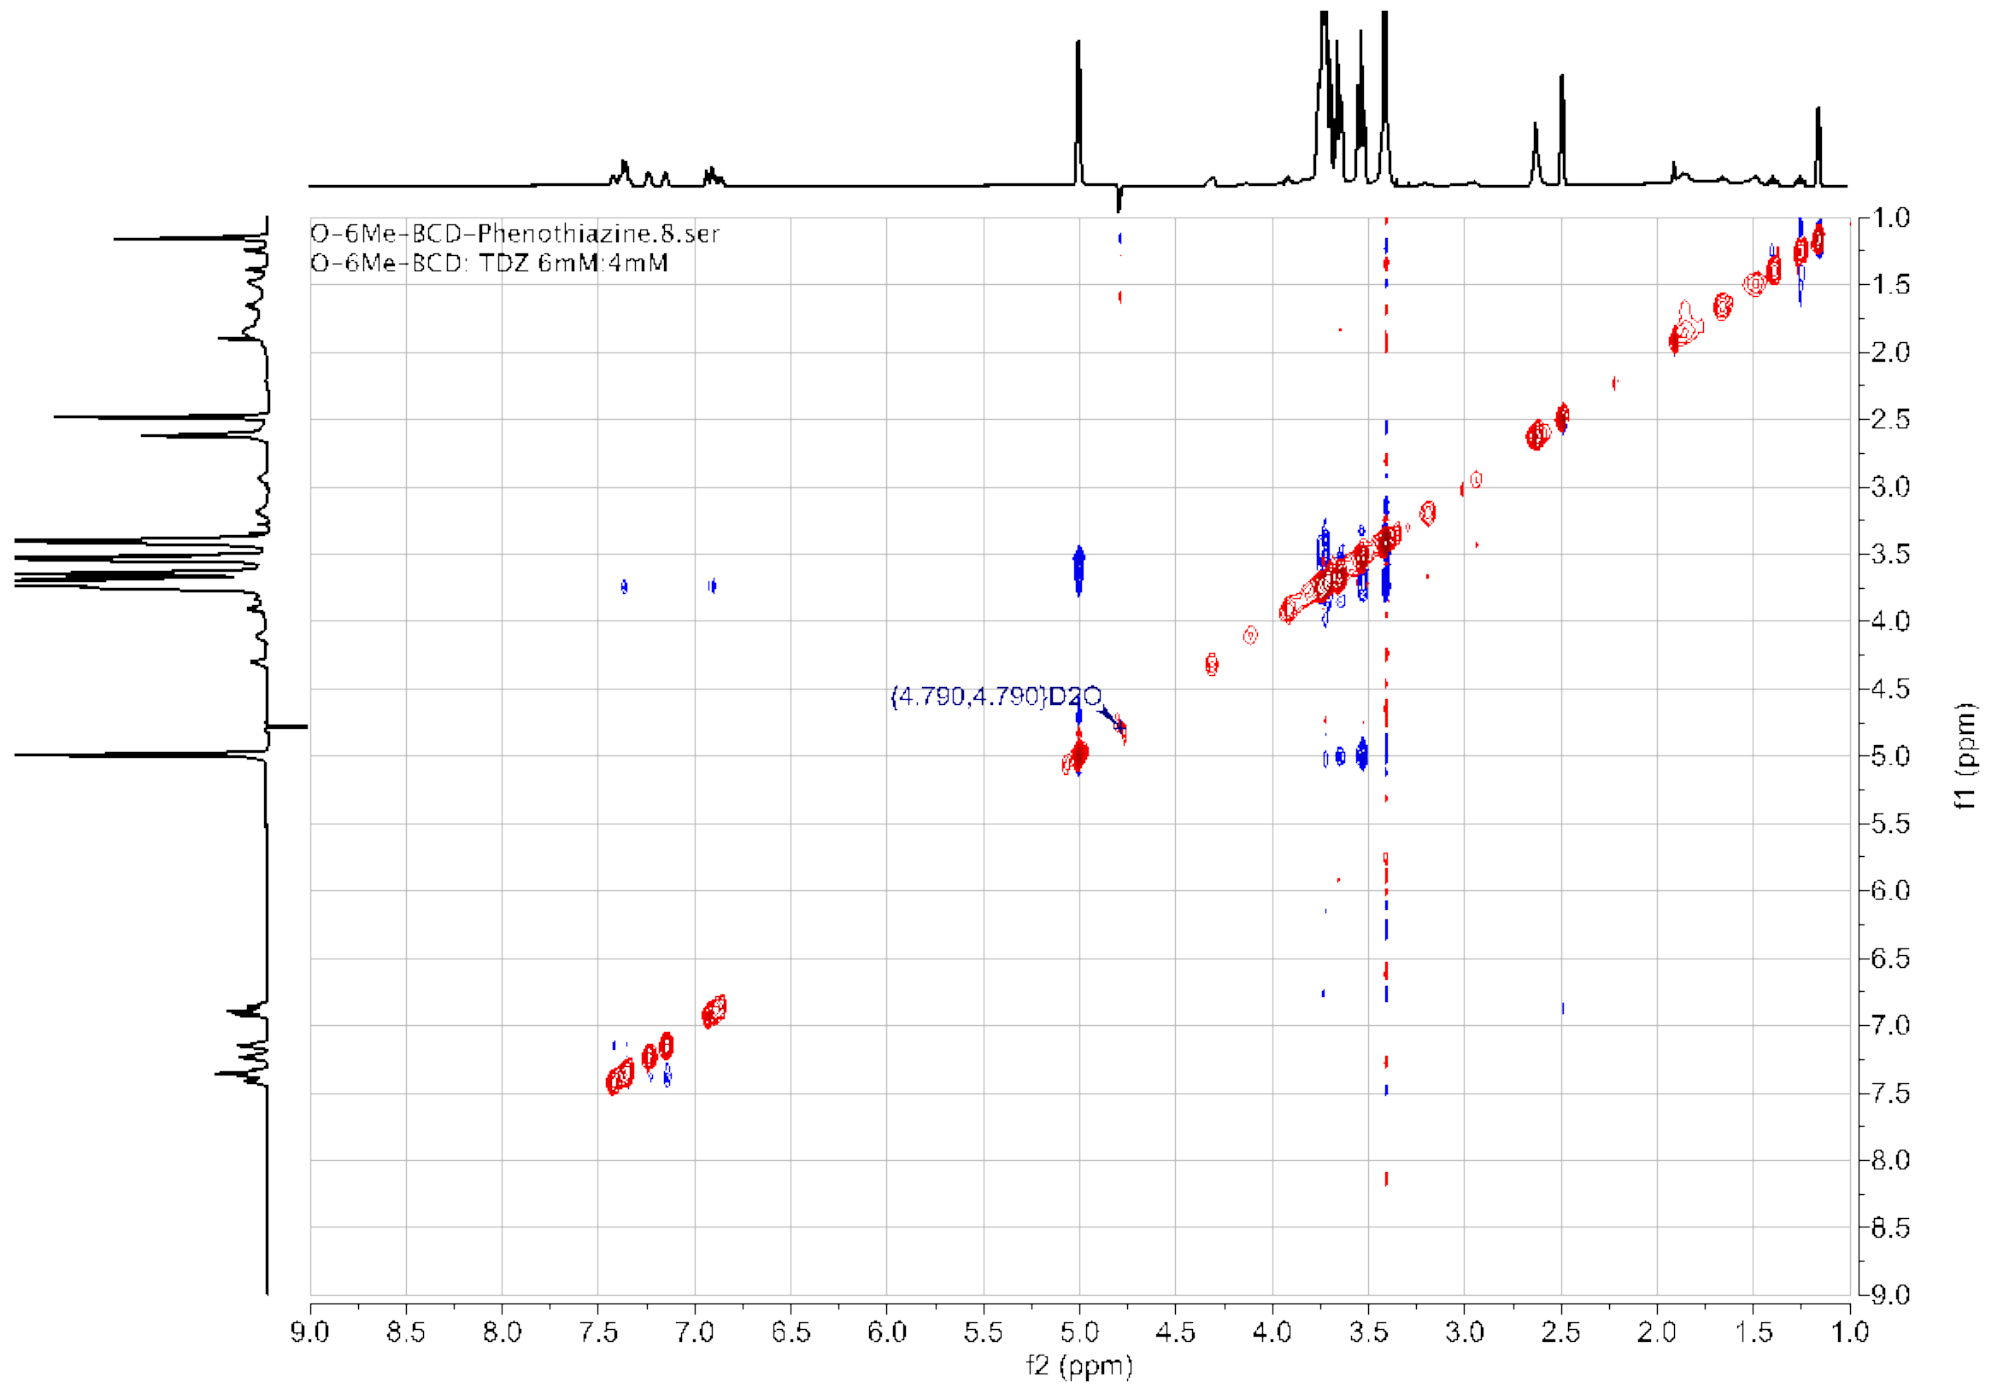

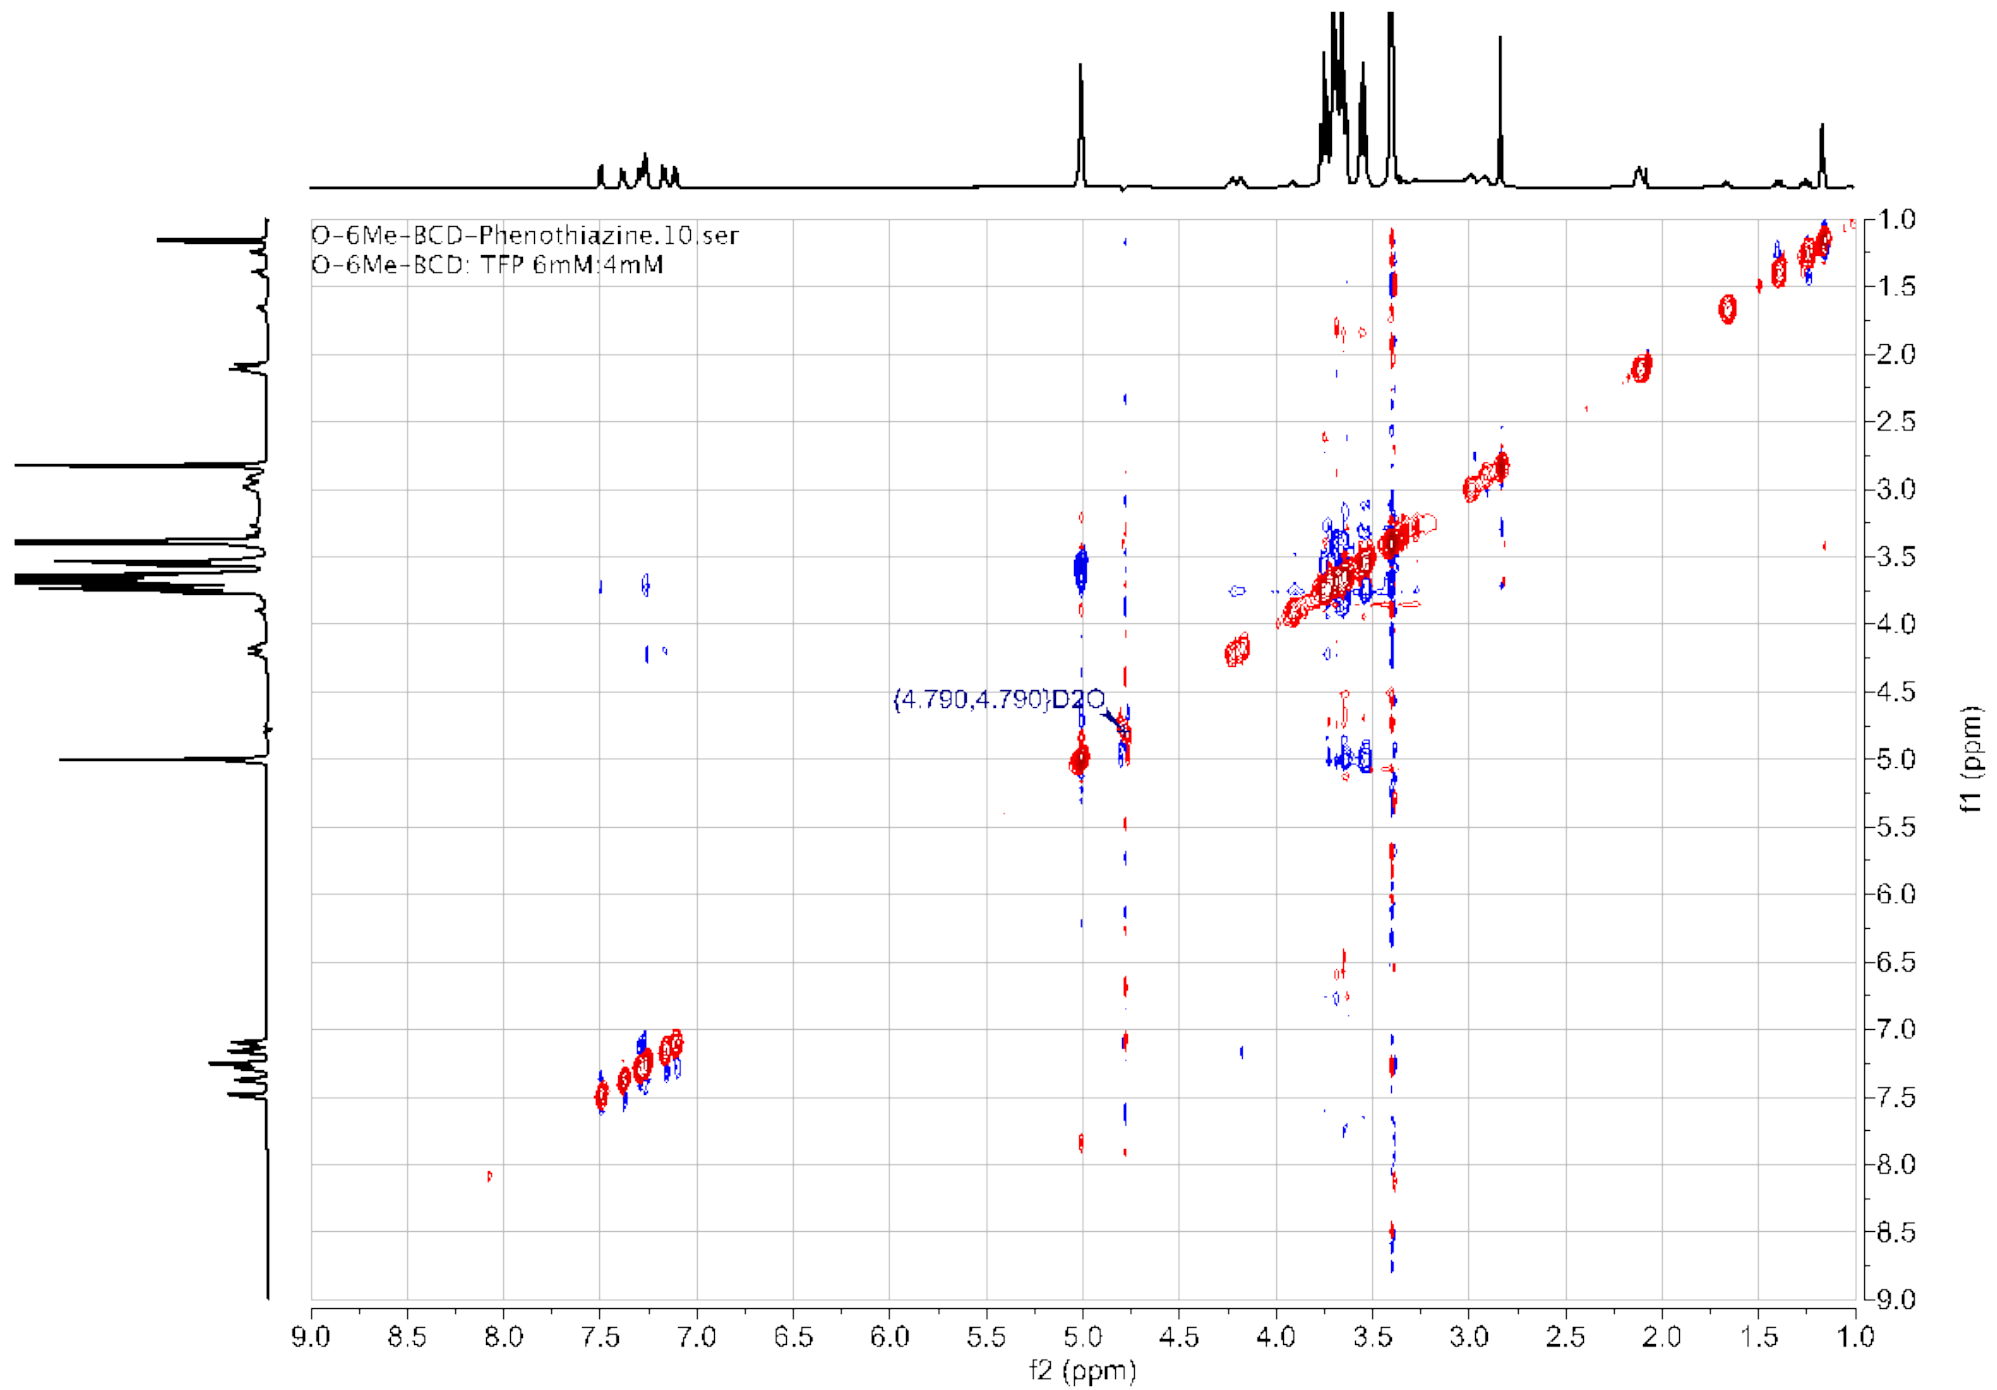

Supplement: d3cp05347d4.pdf [file d3cp05347d4.pdf]
