# Supplementary material for: Host–guest systems for the SAMPL9 blinded prediction challenge: phenothiazine as a privileged scaffold for binding to cyclodextrins
Source: Royal Society of Chemistry journal article supplement (doi:10.1039/d3cp05347d), 2023-12-13
Supplement: d3cp05347d5.pdf [file d3cp05347d5.pdf]

# Structure-Binding Relationship of Permethylated Cyclodextrins and Phenothiazine Drugs

Andrade, B., Chen, A., and Gilson, M. K.

Skaggs School of Pharmacy and Pharmaceutical Sciences, University of California, San Diego, 9500 Gilman Drive, La Jolla, California  
92093-0751, USA

\*[mgilson@health.ucsd.edu](mailto:mgilson@health.ucsd.edu)

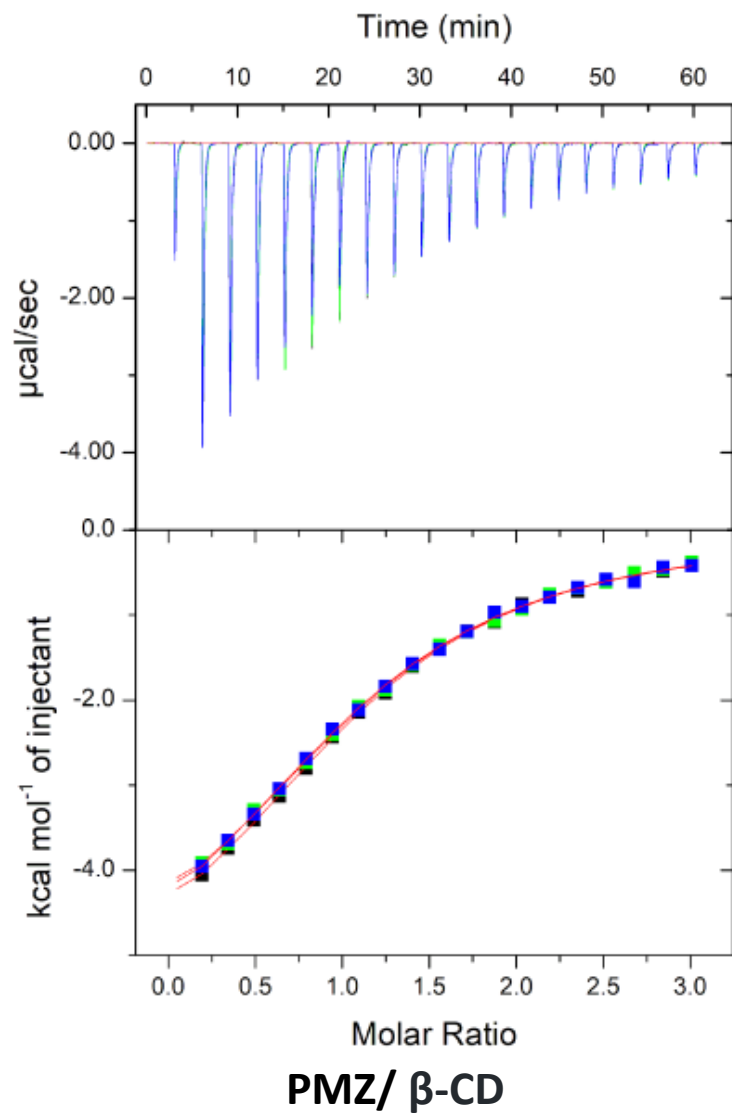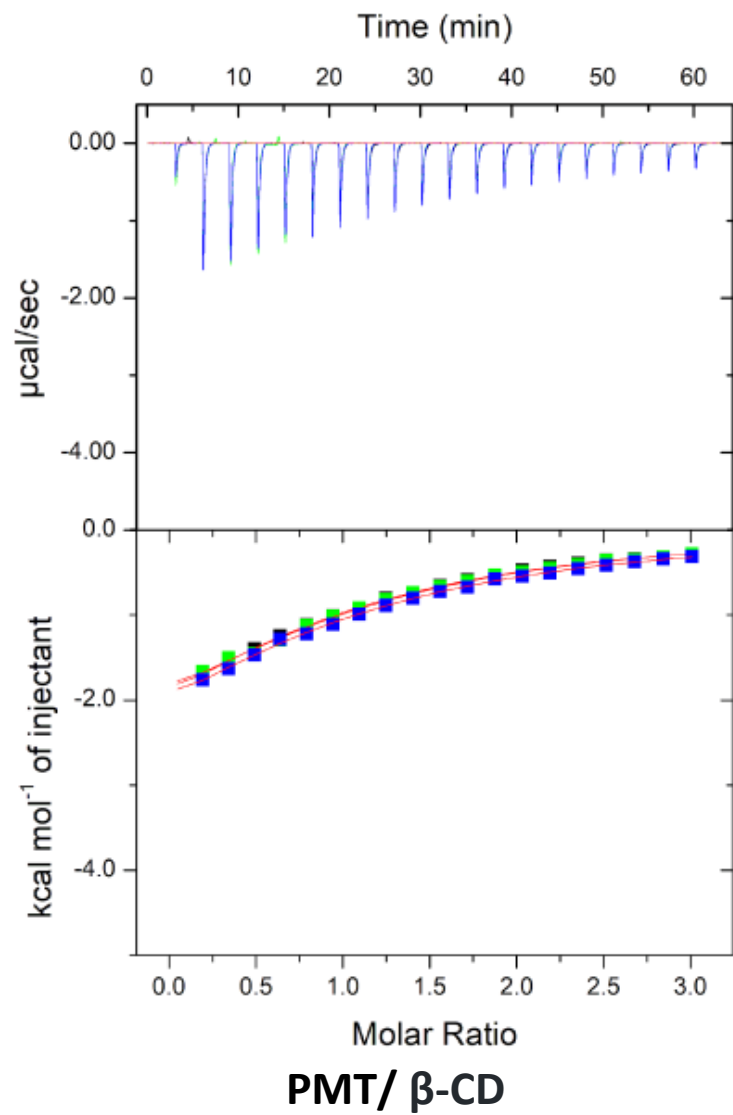

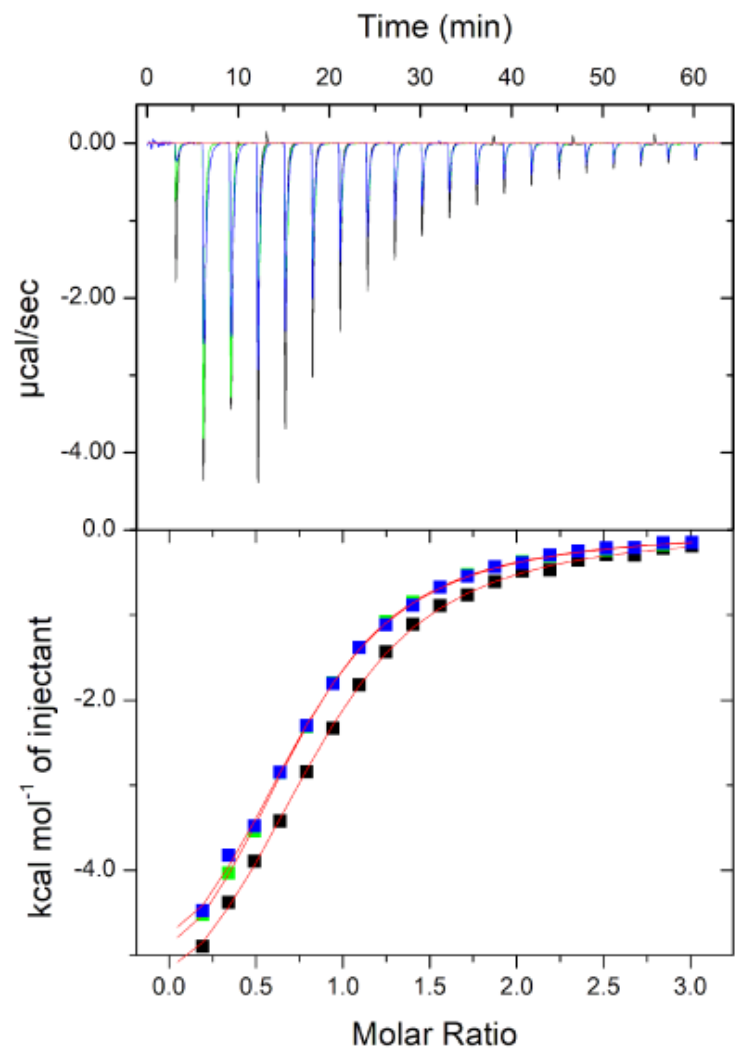

**CPZ/  $\beta$ -CD**

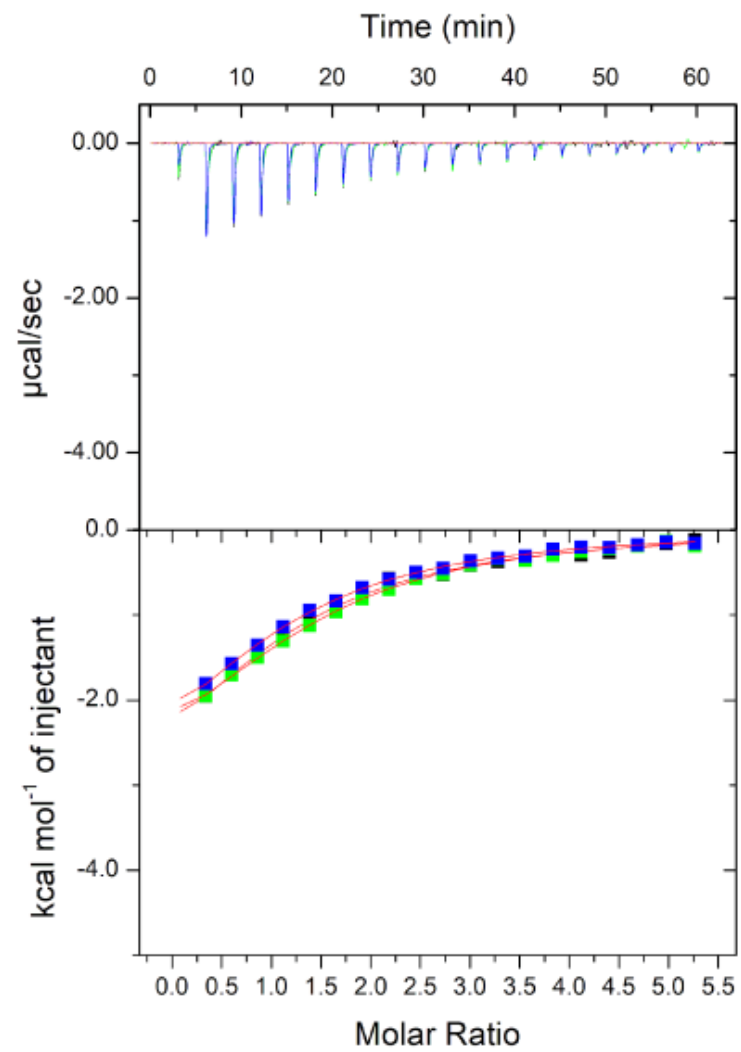

**TFP /  $\beta$ -CD**

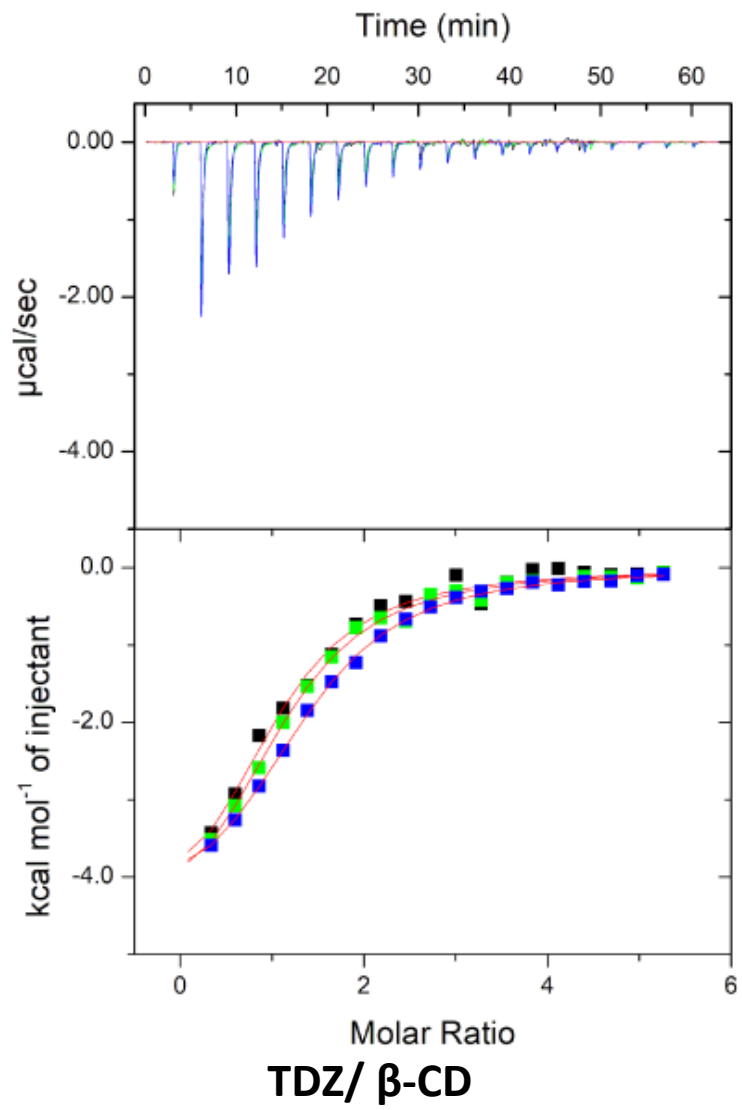

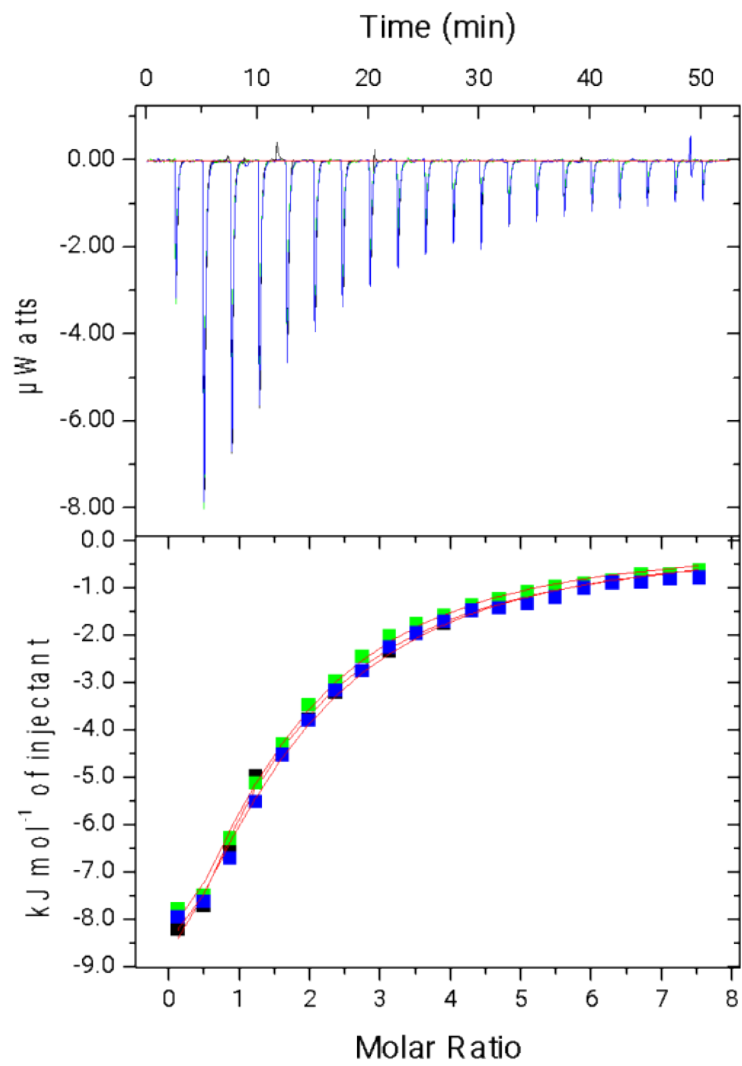

**PMZ/ H6M- $\beta$ -CD**

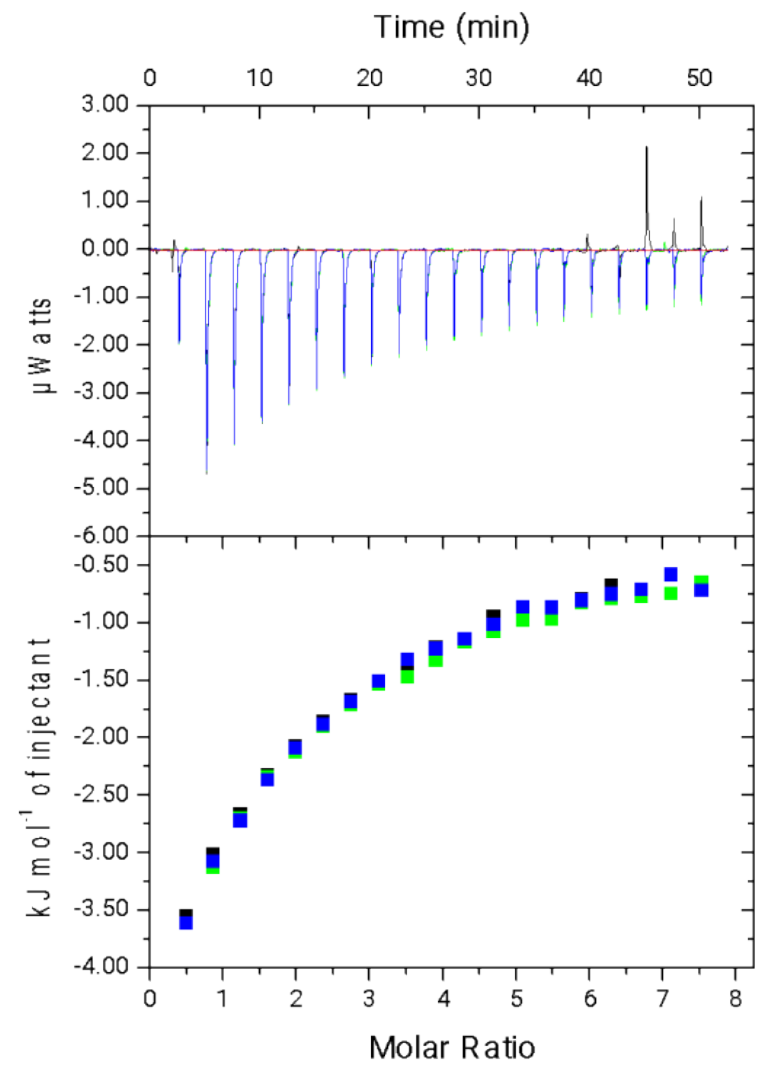

**PMT/ H6M- $\beta$ -CD**

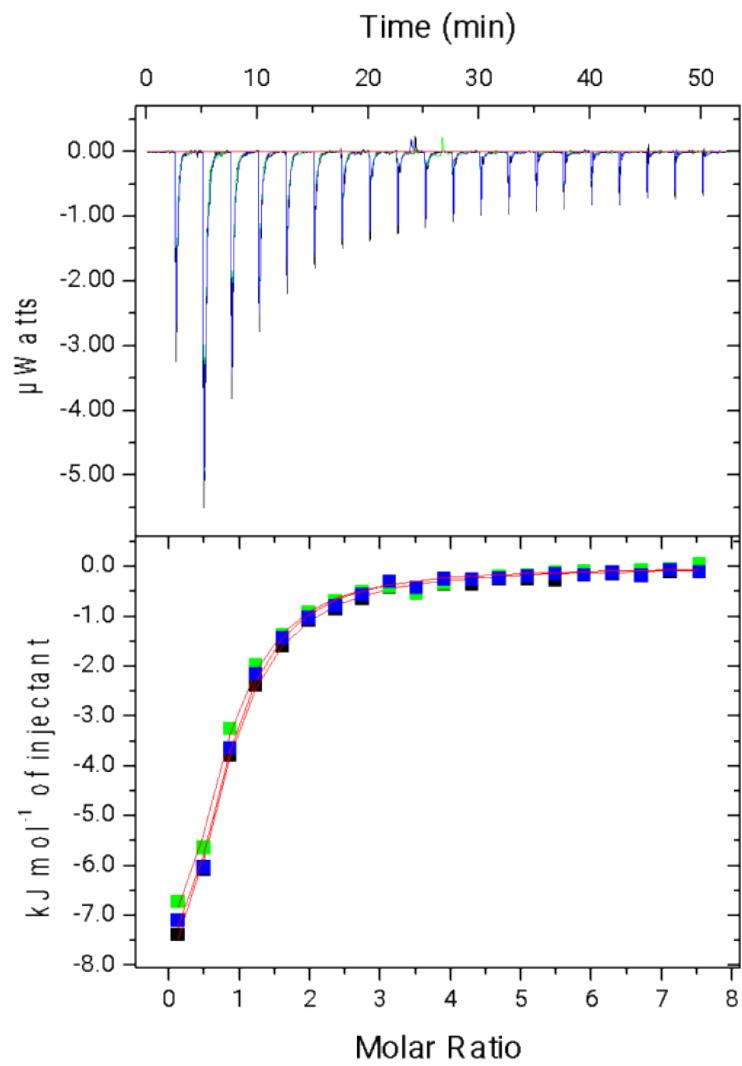

**CPZ/ H6M- $\beta$ -CD**

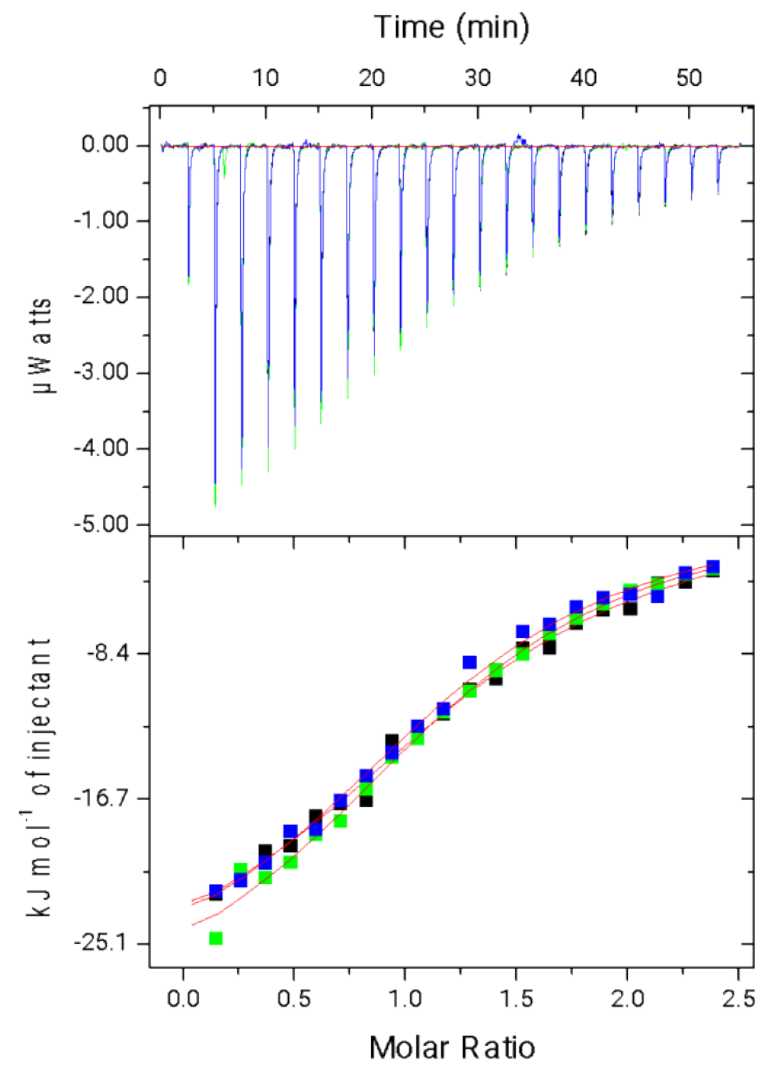

**TDZ/ H6M- $\beta$ -CD**

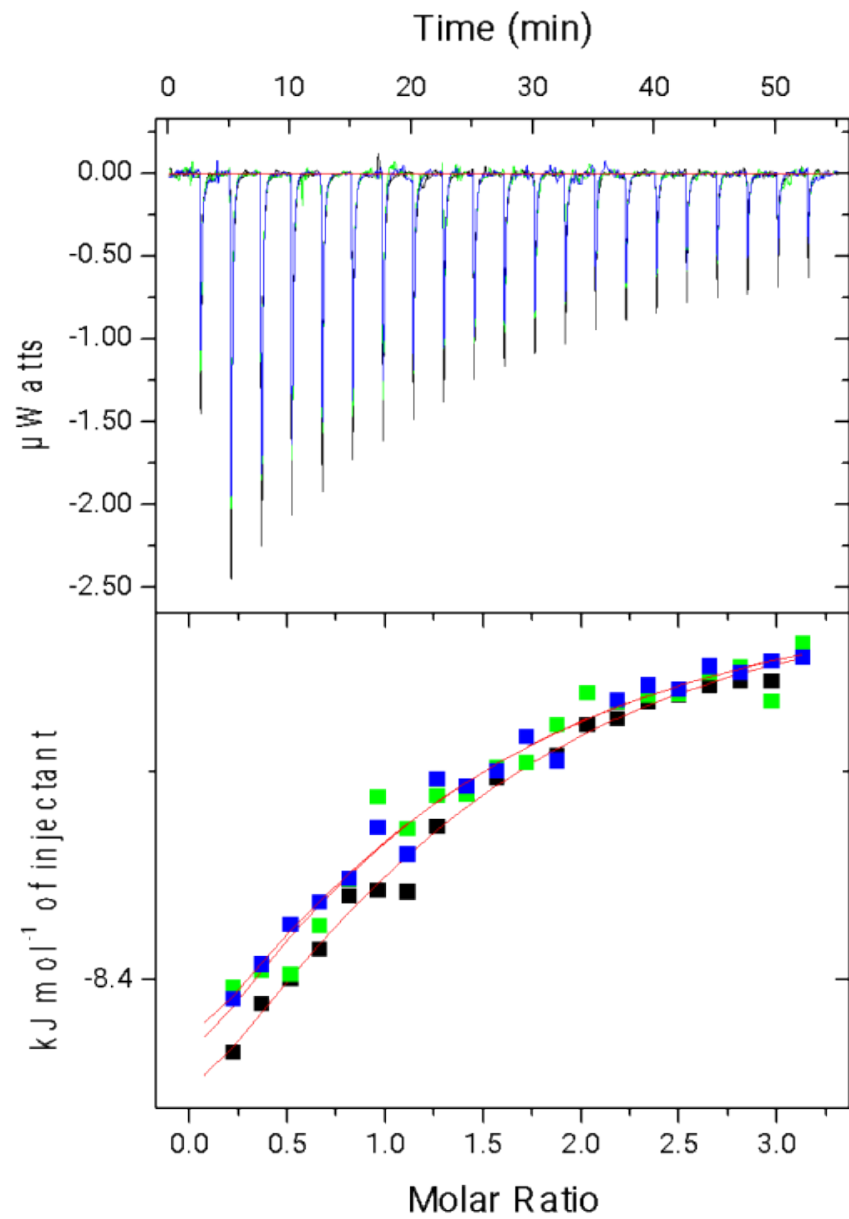

**TFP/ H6M- $\beta$ -CD**

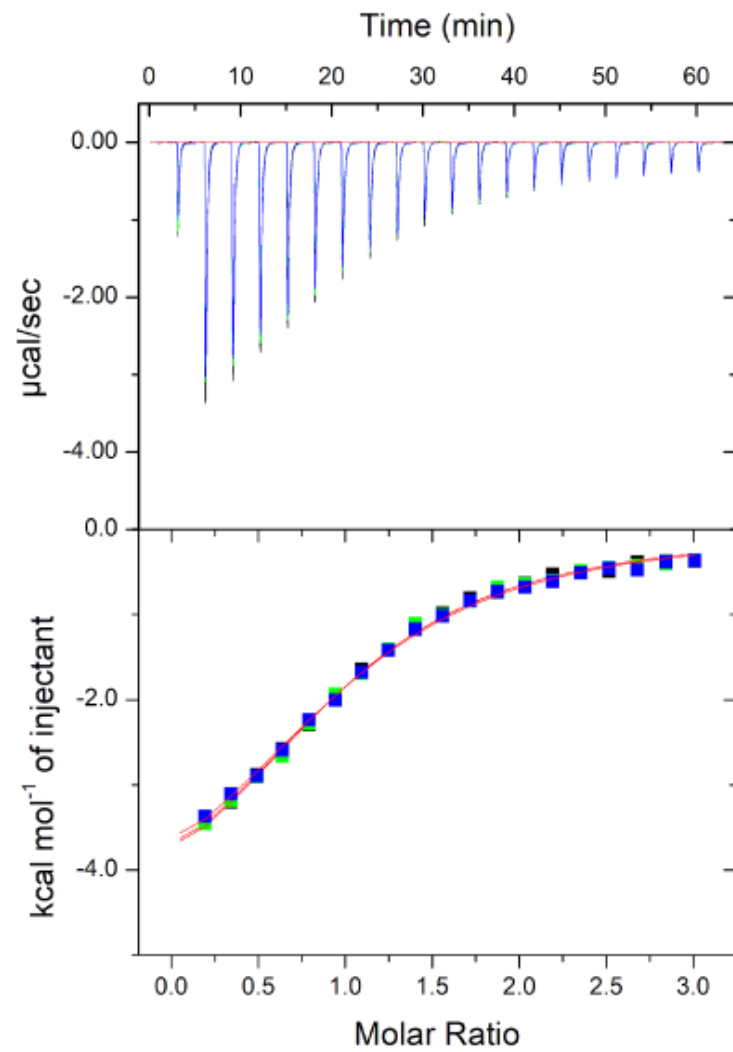

**PMZ/ H26DM- $\beta$ -CD**

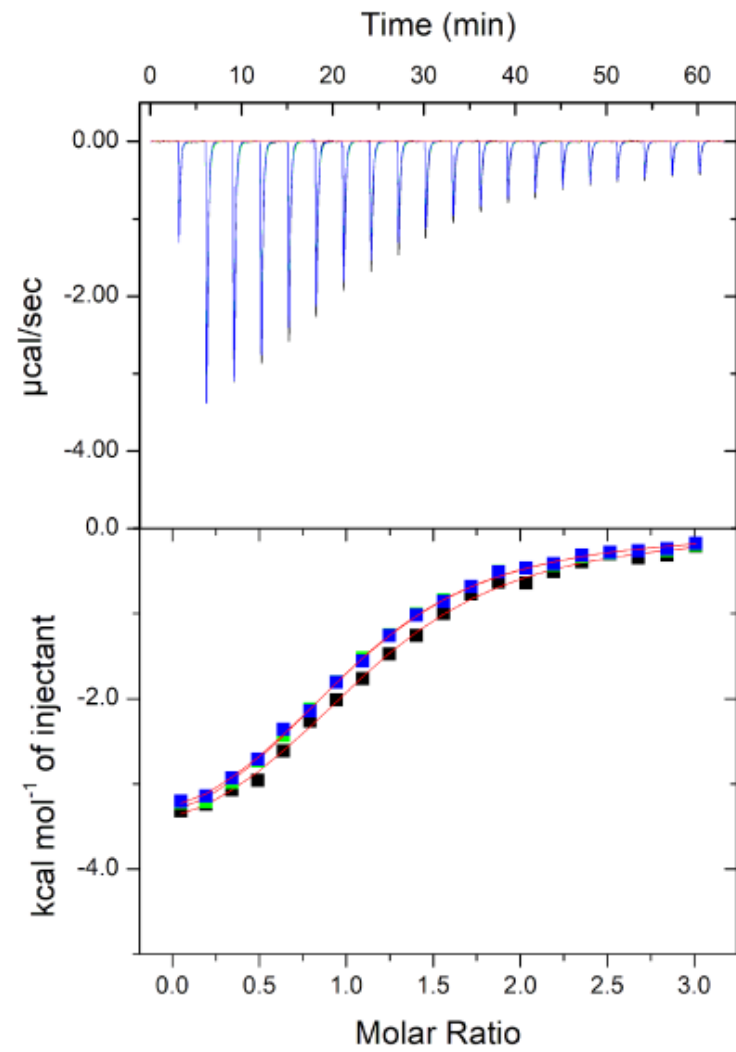

**PMT/ H26DM- $\beta$ -CD**



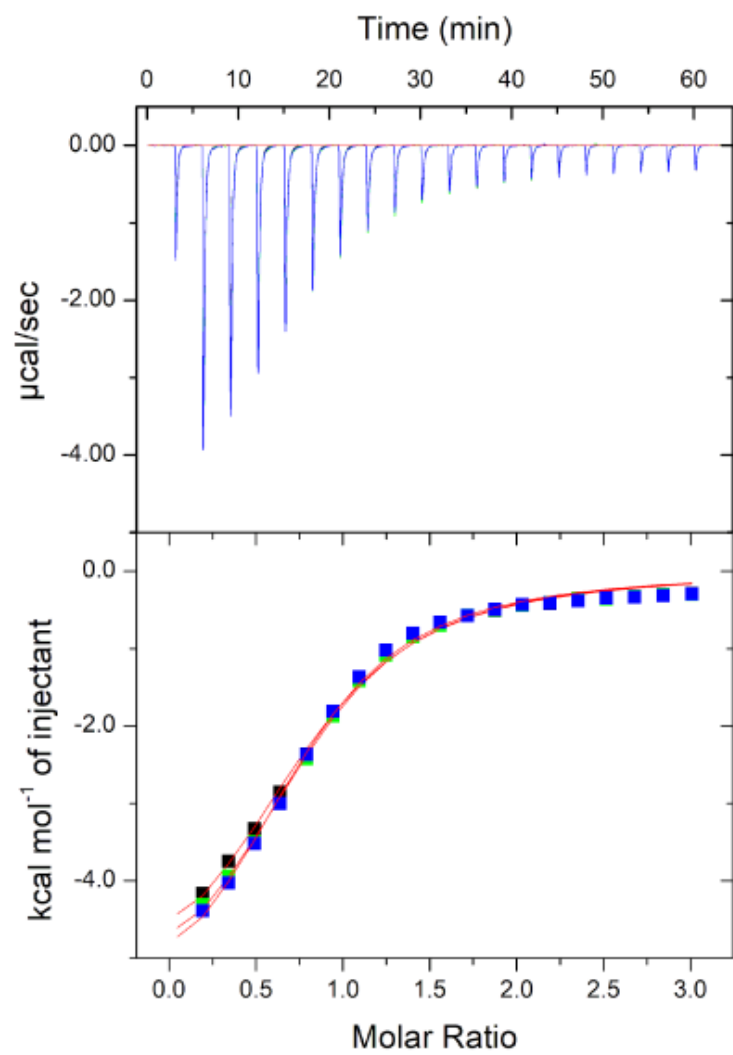

**CPZ/ H26DM-β-CD**

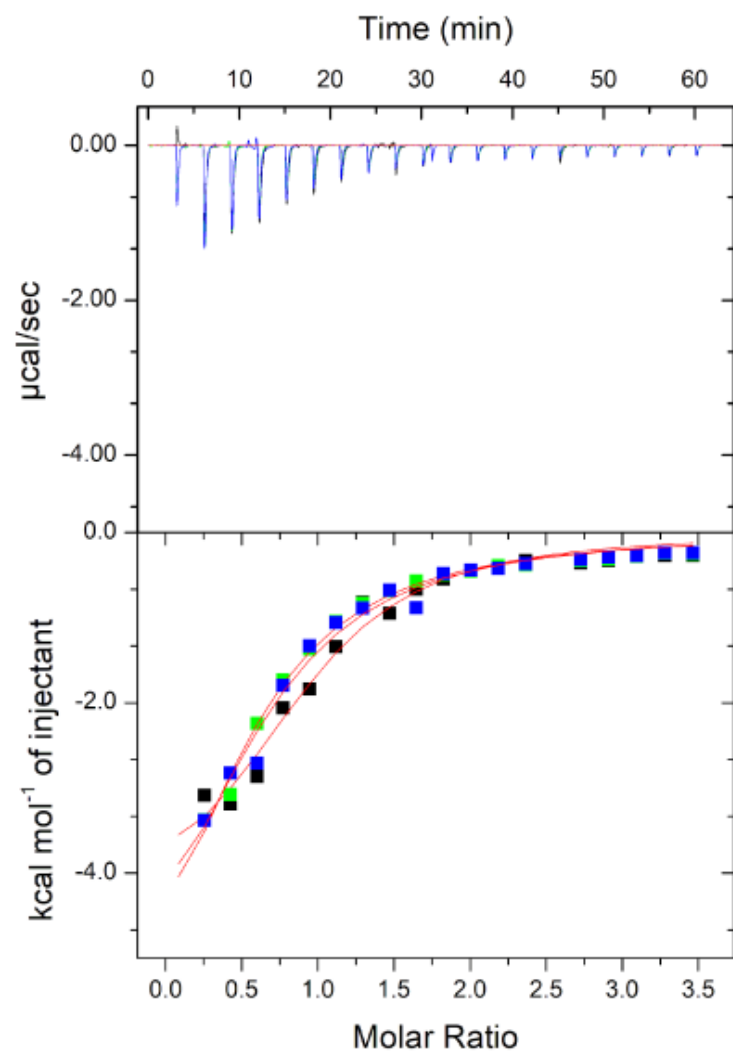

**TDZ/ H26DM-β-CD**

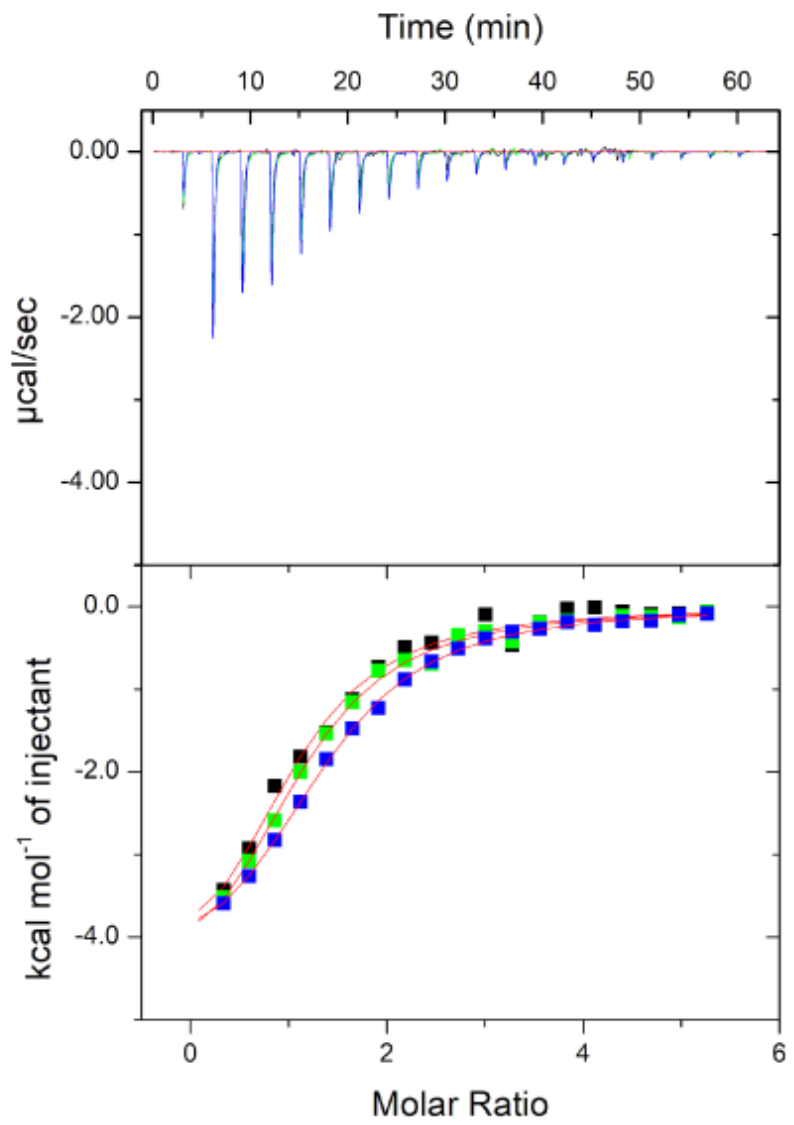

**TFP/ H26DM- $\beta$ -CD**

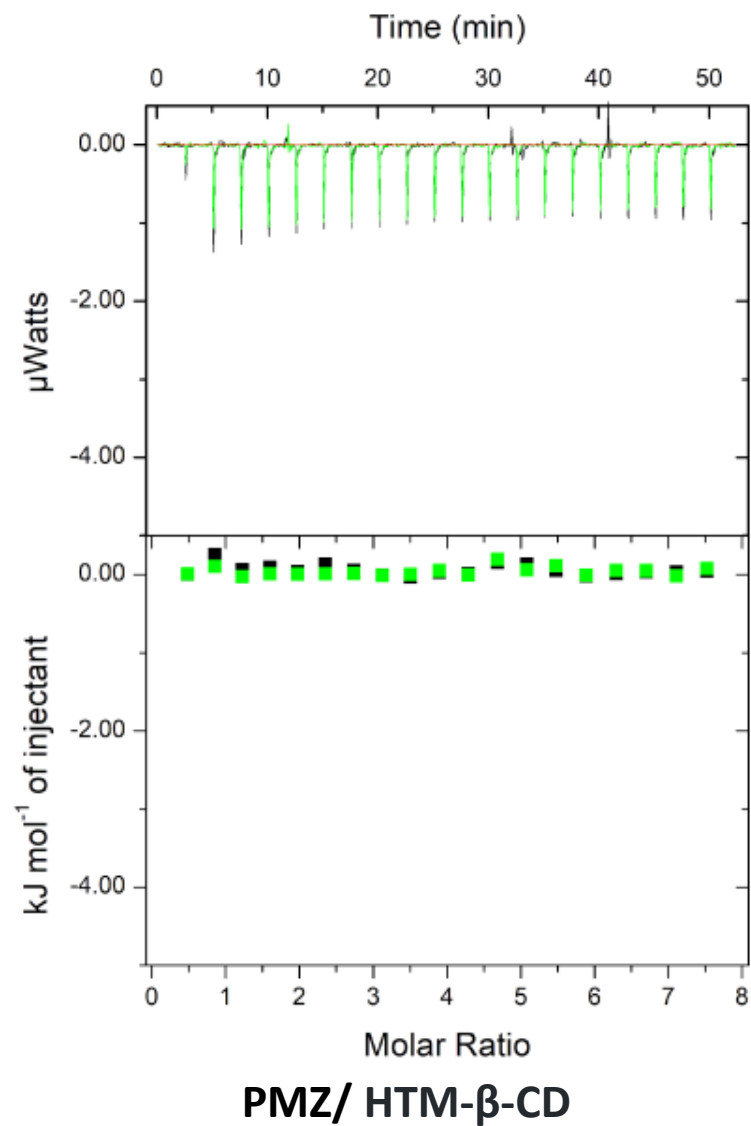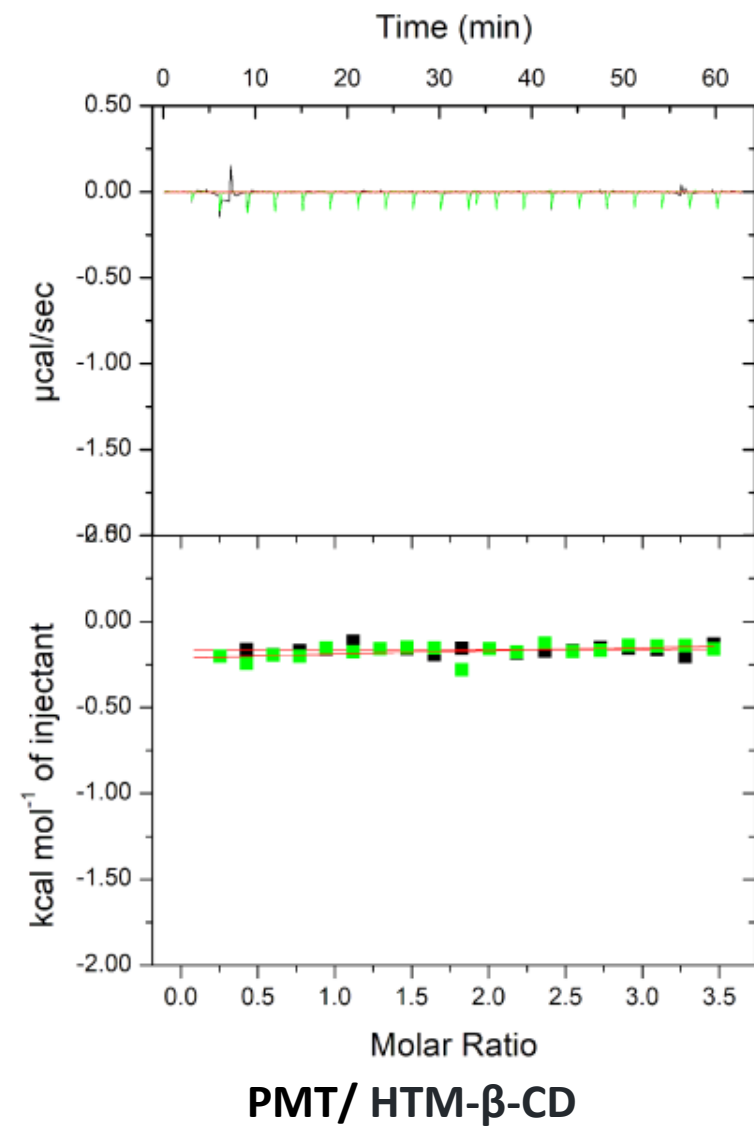

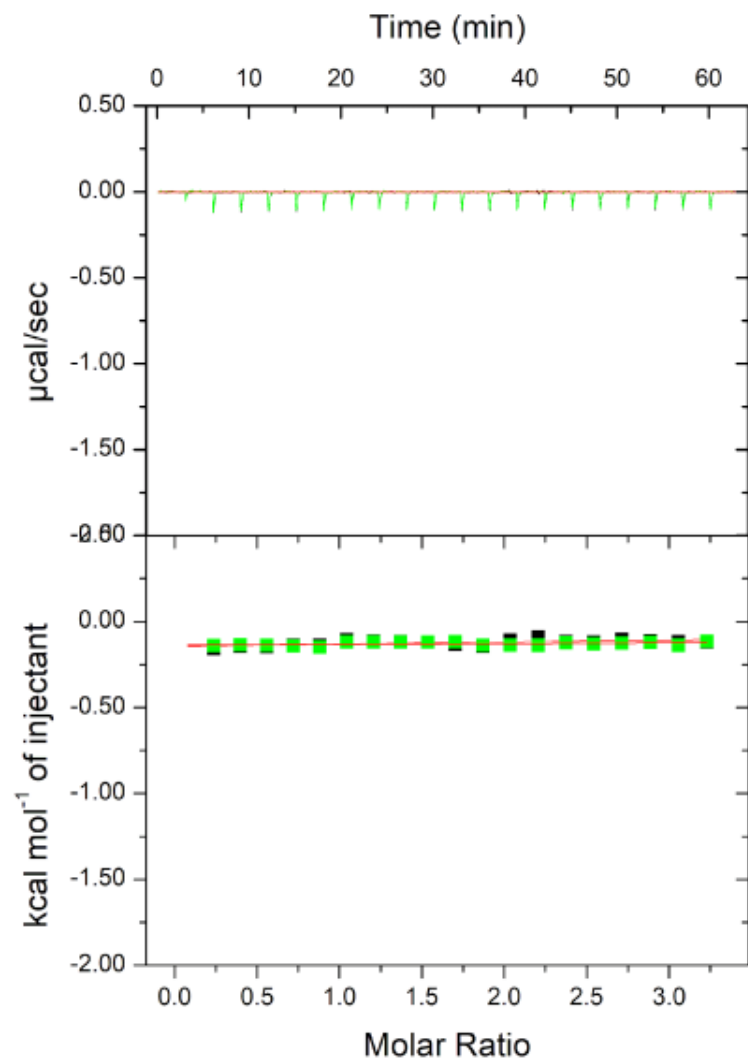

**CPZ/ HTM-β-CD**

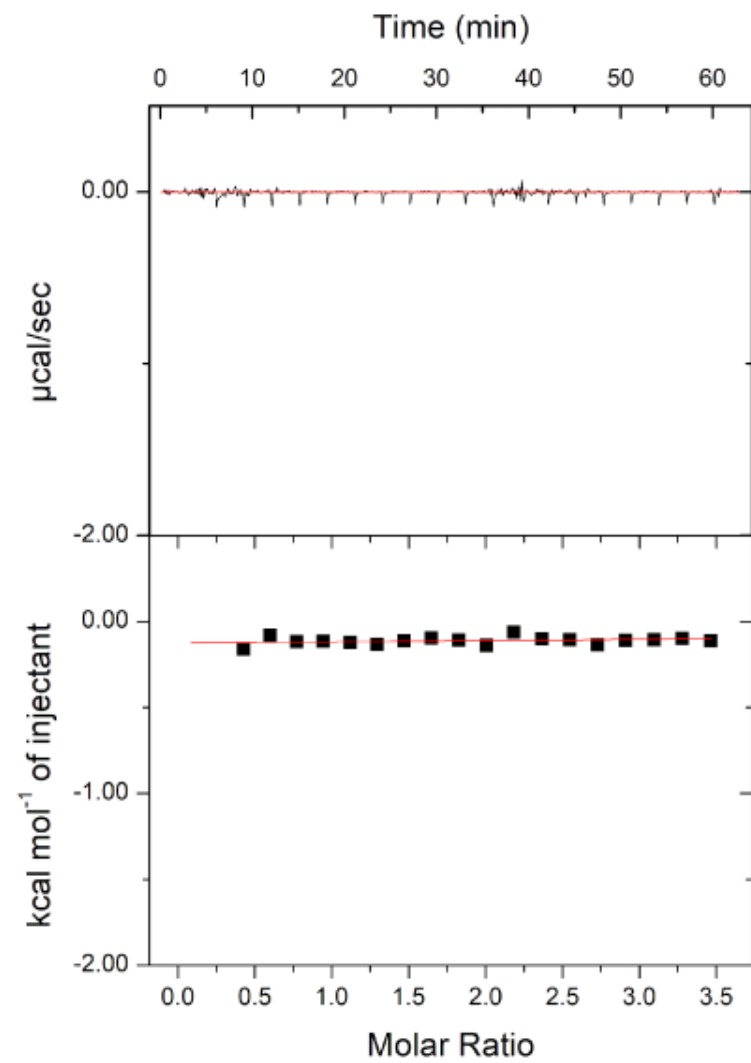

**TDZ/ HTM-β-CD**

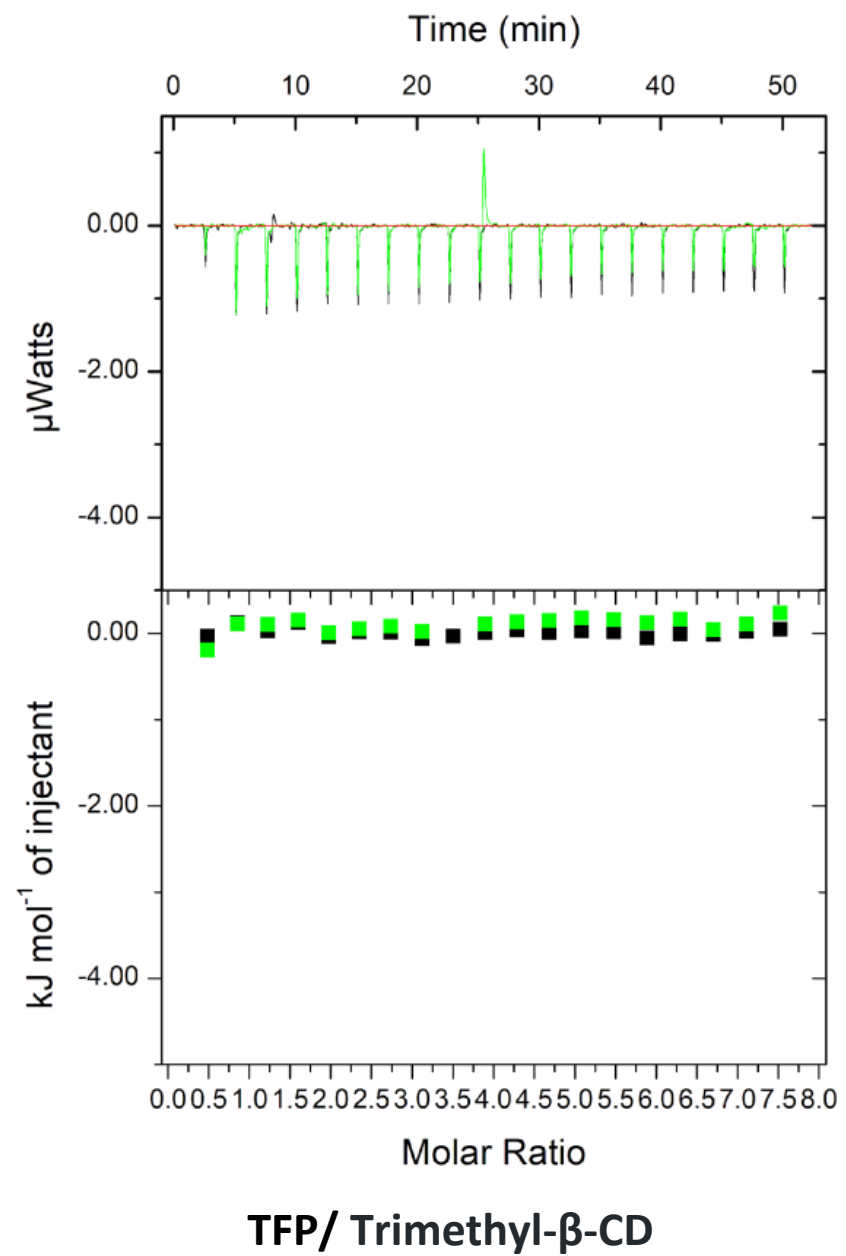

**TFP/ Trimethyl- $\beta$ -CD**
