# Supplementary material for: Host–guest systems for the SAMPL9 blinded prediction challenge: phenothiazine as a privileged scaffold for binding to cyclodextrins
Source: Royal Society of Chemistry journal article supplement (doi:10.1039/d3cp05347d), 2023-12-13
Supplement: d3cp05347d6.xlsx [file d3cp05347d6.xlsx]

## Sheet: Binding Thermodynamic Summary
Host	Guest	N	Std Dev	Ka (M^-1)	Std Dev	Kd (mM)	Std Dev	ΔH kJ/mol	Std Dev	ΔS J/mol/K	Std Dev	TΔS kJ/mol	Std Dev	ΔG kJ/mol	Std Dev	ΔG kcal/mol	ΔH kcal/mol	TΔS kcal/mol
β-CD	PMZ	1.09	0.0152753	4440	156.205	225.225	8	-24.7553	0.553322	-13.1796	2.06	-3.92752	0.6	-20.8258	0.101467	-4.9775	-5.91667	-0.938701
β-CD	PMT	0.936	0.0564269	1903.33	156.312	525.394	43	-16.4529	1.39007	7.60791	5.33	2.26716	1.6	-18.7205	0.202383	-4.47431	-3.93234	0.541864
β-CD	CPZ	0.769	0.0208407	9387.5	330	106.525	4	-26.037	0.840151	-11.0597	3.02	-3.29579	0.9	-22.7396	0.0864279	-5.4349	-6.22301	-0.787714
β-CD	TDZ	1.14	0.166533	15066.7	723.418	66.3717	3	-20.6215	0.790237	10.8226	3.06	3.22514	0.9	-23.8483	0.123481	-5.69989	-4.92867	0.770828
β-CD	TFP	1.17667	0.141539	5103.33	496.622	195.95	19	-16.305	1.67019	16.2897	6.04	4.85433	1.9	-21.1618	0.243125	-5.0578	-3.897	1.16021
H6M-BCD	PMZ	1.23	0.0152753	2703.33	647.328	369.914	91	-20.1711	3.76355	-1.01811	13.58	-0.303396	4	-19.8675	0.296249	-4.74846	-4.82101	-0.0725134
H6M-BCD	PMT	0.79	0.0564269	1223.33	92.9157	817.439	64	-24.7163	3.83668	-23.807	13.43	-7.09447	4	-17.6182	1.8	-4.21086	-5.90734	-1.69562
H6M-BCD	CPZ	0.62	0.0208407	12133.3	1250.33	82.4176	9	-12.6217	0.950536	35.829	4.02	10.677	1.2	-23.3041	0.260653	-5.56983	-3.01667	2.55188
H6M-BCD	TDZ	1.21	0.166533	31233.3	1950.21	32.0171	2	-29.4038	0.899884	-12.5799	2.85	-3.74881	0.8	-25.6531	0.153393	-6.13124	-7.02767	-0.895988
H6M-BCD	TFP	1.01	0.141539	7693.33	1096.65	129.983	17	-22.7624	2.15371	-1.98182	8.23	-0.590583	2.5	-22.1715	0.341703	-5.29912	-5.44034	-0.141153
H26DM β-CD	PMZ	0.985	0.0137477	5083.33	158.85	196.721	6	-21.4263	0.215032	-0.873061	0.54	-0.260172	2	-21.1506	0.0811834	-5.05512	-5.12101	-0.0621827
H26DM β-CD	PMT	1.06	0.0585947	8416.67	150.444	118.812	2	-16.9647	0.252304	18.2422	1.01	5.43619	0.3	-22.4036	0.0505498	-5.35461	-4.05467	1.29928
H26DM β-CD	CPZ	0.768667	0.0187705	9113.33	471.204	109.729	6	-24.9534	0.678621	-7.87987	1.92	-2.3482	0.6	-22.604	0.140151	-5.40249	-5.96401	-0.561234
H26DM β-CD	TDZ	0.874	0.0246644	54866.7	2871.12	18.226	1	-38.3352	0.281678	-37.7955	1.33	-11.263	0.4	-27.0665	0.139466	-6.46905	-9.16234	-2.69194
H26DM β-CD	TFP	0.556	0.0714178	11500	707.107	86.9565	5	-31.0516	3.64787	-26.3592	12.78	-7.85504	3.8	-23.1926	0.162743	-5.54316	-7.42151	-1.8774

## Sheet: BCD
Host	Guest	Ligand Conc. (mM)	Host Conc. (mM)	N	Std Dev	Ka (M^-1)	Std Dev	Kd x10^3 (M)	Std Dev	ΔH kJ/mol	Std Dev	ΔS J/mol/deg	Std Dev	TΔS kJ/mol	Std Dev	ΔG kJ/mol (conv)	Std Dev
β-CD	PMZ	0.5	10	1.09	0.0152753	4440	156.205	225.225	8.09191	-24.7553	0.553322	-13.1796	2.05655	-3.92752	0.612853	-20.8258	0.101467
				1.08		4260		234.742		-25.0873		-14.6858		-4.37638		-20.7087
				1.11		4540		220.264		-24.1166		-10.8366		-3.22929		-20.8857
				1.09		4520		221.239		-25.0622		-14.0164		-4.17689		-20.8832
β-CD	PMT	0.5	10	0.936	0.0564269	1903.33	156.312	525.394	42.6991	-16.4529	1.39007	7.60791	5.32521	2.26716	1.58691	-18.7205	0.202383
				0.944		1760		568.182		-17.51		3.40996		1.01617		-18.5267
				0.876		1880		531.915		-16.9703		5.81576		1.7331		-18.7043
				0.988		2070		483.092		-14.8783		13.598		4.0522		-18.9305
β-CD	CPZ	0.5	10	0.769	0.0208407	9387.5	330	106.525	3.55594	-26.037	0.840151	-11.0597	3.0236	-3.29579	0.901032	-22.7396	0.0864279
				0.768		9310		107.411		-26.9408		-14.393		-4.2891		-22.6495
				0.727		9970		100.301		-25.8906		-10.2926		-3.06721		-22.8218
				0.741		9640		103.734		-25.2797		-8.49352		-2.53107		-22.7474
β-CD	TDZ	0.2	7	1.14	0.166533	15066.7	723.418	66.3717	3.10744	-20.6215	0.790237	10.8226	3.06214	3.22514	0.912519	-23.8483	0.123481
				1.01		14700		68.0272		-20.874		9.79056		2.91759		-23.793
				1.09		14600		68.4932		-21.2547		8.40984		2.50613		-23.7621
				1.33		15900		62.8931		-19.7359		14.2674		4.2517		-23.9898
β-CD	TFP	0.2	7	1.17667	0.141539	5103.33	496.622	195.95	18.6119	-16.305	1.67019	16.2897	6.40157	4.85433	1.90767	-21.1618	0.243125
				1.1		4680		213.675		-18.0038		9.87424		2.94252		-20.9478
				1.34		5650		176.991		-14.6649		22.6773		6.75783		-21.4262
				1.09		4980		200.803		-16.2465		16.3176		4.86264		-21.1116

## Sheet: H6M-BCD
Host	Guest	Ligand Conc. (mM)	Host Conc. (mM)	N	Std Dev	Ka (M^-1)	Std Dev	Kd (μM)	Std Dev	ΔH kJ/mol	Std Dev	ΔS J/K/mol	Std Dev	TΔS kJ/mol	Std Dev	ΔG kJ/mol (conv)	Std Dev
H6M-BCD	PMZ	0.2	10	1.23	0.177764	2703.33	647.328	384.372	91.4334	-20.1711	3.76355	-1.01811	13.5781	-0.303396	4.04628	-19.8675	0.296249
				1.03		2640		378.788		-24.5015		-16.6105		-4.94992		-19.5491
				1.29		3380		295.858		-17.69		8.20064		2.44379		-20.135
				1.37		2090		478.469		-18.3217		5.35552		1.59594		-19.9185
H6M-BCD	PMT	0.2	10	0.787667	0.0935539	1223.33	92.9157	820.696	64.3592	-24.7163	3.83668	-23.807	13.4279	-7.09447	4.00151	-17.6182	0.176738
				0.894		1300		769.231		-20.6606		-9.70688		-2.89265		-17.7665
				0.718		1120		892.857		-28.288		-36.4426		-10.8599		-17.4227
				0.751		1250		800		-25.2002		-25.2714		-7.53087		-17.6656
H6M-BCD	CPZ	0.2	10	0.617667	0.0276827	12133.3	1250.33	83.0049	8.56381	-12.6217	0.950536	35.829	4.01671	10.677	1.19698	-23.3041	0.260653
				0.614		10900		91.7431		-13.7026		31.3382		9.33877		-23.0461
				0.592		12100		82.6446		-12.2466		37.0702		11.0469		-23.2991
				0.647		13400		74.6269		-11.916		39.0786		11.6454		-23.5673
H6M-BCD	TDZ	0.1	1.5	1.20667	0.046188	31233.3	1950.21	32.1034	2.07437	-29.4038	0.899884	-12.5799	2.84676	-3.74881	0.848335	-25.6531	0.153393
				1.26		29000		34.4828		-28.8947		-11.4642		-3.41632		-25.4767
				1.18		32100		31.1526		-30.4428		-15.8155		-4.71302		-25.7274
				1.18		32600		30.6748		-28.8738		-10.46		-3.11708		-25.7551
H6M-BCD	TFP	0.1	3	1.00933	0.106308	7693.33	1096.65	131.64	17.4522	-22.7624	2.15371	-1.98182	8.2303	-0.590583	2.45263	-22.1715	0.341703
				1.12		8950		111.732		-20.828		5.81576		1.7331		-22.5619
				0.908		6930		144.3		-25.0831		-10.5855		-3.15448		-21.927
				1		7200		138.889		-22.376		-1.1757		-0.35036		-22.0255

## Sheet: H26DM-BCD
Host	Guest	Ligand Conc. (mM)	Host Conc. (mM)	N	Std Dev	Ka (M^-1)	Std Dev	Kd x10^3 (M)	Std Dev	ΔH kJ/mol	Std Dev	ΔS J/mol/K (conv.)	Std Dev	TΔS kJ/mol	Std Dev	ΔG kJ/mol (conv)	Std Dev
H26DM β-CD	PMZ	0.5	10	0.985	0.0137477	5083.33	158.85	193.237	6.264	-21.4263	0.215032	-0.873061	0.538946	-0.260172	0.160606	-21.1506	0.0811834
				0.982		5180		193.05		-21.3802		-0.602496		-0.179544		-21.2006
				0.973		5170		193.424		-21.6396		-1.49369		-0.445119		-21.1943
				1		4900		204.082		-21.2129		-0.523		-0.155854		-21.0569
H26DM β-CD	PMT	0.5	10	1.06	0.0585947	8416.67	150.444	119.845	2.1295	-16.9647	0.252304	18.2422	1.00503	5.43619	0.299499	-22.4036	0.0505498
				1.13		8260		121.065		-17.1502		17.4473		5.19929		-22.3521
				1.02		8430		118.624		-17.0665		17.9075		5.33644		-22.4057
				1.04		8560		116.822		-16.6774		19.3719		5.77283		-22.4532
H26DM β-CD	CPZ	0.5	10	0.768667	0.0187705	9113.33	471.204	111.762	5.8568	-24.9534	0.678621	-7.87987	1.92297	-2.3482	0.573046	-22.604	0.140151
				0.78		8570		116.686		-24.3383		-6.35968		-1.89518		-22.4422
				0.779		9360		106.838		-24.8404		-7.23832		-2.15702		-22.6823
				0.747		9410		106.27		-25.6814		-10.0416		-2.9924		-22.6875
H26DM β-CD	TDZ	0.2	7	0.874	0.0246644	54866.7	2871.12	18.664	0.974588	-38.3352	0.281678	-37.7955	1.33451	-11.263	0.397685	-27.0665	0.139466
				0.846		55600		17.9856		-38.0911		-36.9029		-10.9971		-27.0885
				0.891		51700		19.3424		-38.6434		-39.3296		-11.7202		-26.9173
				0.886		57300		17.452		-38.271		-37.1539		-11.0719		-27.1936
H26DM β-CD	TFP	0.2	7	0.556	0.0714178	11500	707.107	87.1212	5.35687	-31.0516	3.64787	-26.3592	12.7809	-7.85504	3.8087	-23.1926	0.162743
				0.505		11000		90.9091		-33.631		-35.3966		-10.5482		-23.0775
				0.606		12000		83.3333		-28.4721		-17.3218		-5.16188		-23.3076

## Sheet: SMILES
Compound	SMILES
βCD	O[C@@H]1[C@@H](O)[C@H](O[C@@H]2[C@H](O)[C@@H](O)[C@H](O3)[C@@H](CO)O2)[C@@H](CO)O[C@@H]1O[C@H]4[C@H](O)[C@@H](O)[C@@H](O[C@@H]5[C@@H](O)[C@H](O)[C@H](O[C@@H]6[C@@H](O)[C@H](O)[C@H](O[C@@H]7[C@@H](O)[C@H](O)[C@H](O[C@@H]8[C@@H](O)[C@H](O)[C@H]3O[C@H]8CO)O[C@H]7CO)O[C@H]6CO)O[C@H]5CO)O[C@@H]4CO
H-6-M-βCD	O[C@@H]1[C@@H](O)[C@H](O[C@@H]2[C@H](O)[C@@H](O)[C@H](O3)[C@@H](COC)O2)[C@@H](COC)O[C@@H]1O[C@H]4[C@H](O)[C@@H](O)[C@@H](O[C@@H]5[C@@H](O)[C@H](O)[C@H](O[C@@H]6[C@@H](O)[C@H](O)[C@H](O[C@@H]7[C@@H](O)[C@H](O)[C@H](O[C@@H]8[C@@H](O)[C@H](O)[C@H]3O[C@H]8COC)O[C@H]7COC)O[C@H]6COC)O[C@H]5COC)O[C@@H]4COC
H-2,6-DM-βCD	O[C@H]1[C@H](O[C@@H]2[C@H](OC)[C@@H](O)[C@H](O3)[C@@H](COC)O2)[C@@H](COC)O[C@H](O[C@H]4[C@H](O)[C@@H](OC)[C@@H](O[C@@H]5[C@@H](O)[C@H](OC)[C@H](O[C@@H]6[C@@H](O)[C@H](OC)[C@H](O[C@@H]7[C@@H](O)[C@H](OC)[C@H](O[C@@H]8[C@@H](O)[C@H](OC)[C@H]3O[C@H]8COC)O[C@H]7COC)O[C@H]6COC)O[C@H]5COC)O[C@@H]4COC)[C@@H]1OC
H-TM-βCD	CO[C@@H]1[C@@H](OC)[C@H](O[C@@H]2[C@H](OC)[C@@H](OC)[C@H](O[C@@H]3[C@H](OC)[C@@H](OC)[C@H](O4)[C@@H](COC)O3)[C@@H](COC)O2)[C@@H](COC)O[C@@H]1O[C@@H]5[C@@H](OC)[C@H](OC)[C@H](O[C@@H]6[C@@H](OC)[C@H](OC)[C@H](O[C@@H]7[C@@H](OC)[C@H](OC)[C@H](O[C@@H]8[C@@H](OC)[C@H](OC)[C@H]4O[C@H]8COC)O[C@H]7COC)O[C@H]6COC)O[C@H]5COC
PMZ	C[NH+](C)CCCN1C2=C(C=CC=C2)SC3=C1C=CC=C3.[Cl-]
TDZ	C[NH+](CCCC1)C1CCN2C3=C(C=CC(SC)=C3)SC4=C2C=CC=C4.[Cl-]
TFP	C[NH+](CC1)CC[NH+]1CCCN2C3=C(C=CC(C(F)(F)F)=C3)SC4=C2C=CC=C4
PMT	C[NH+](C)C(C)CN1C2=C(C=CC=C2)SC3=C1C=CC=C3.[Cl-]
CPZ	ClC1=CC2=C(C=C1)SC3=C(C=CC=C3)N2CCC[NH+](C)C.[Cl-]
