# Supplementary figures and images for: Host–guest systems for the SAMPL9 blinded prediction challenge: phenothiazine as a privileged scaffold for binding to cyclodextrins
Source: Royal Society of Chemistry journal article supplement (doi:10.1039/d3cp05347d), 2023-12-13

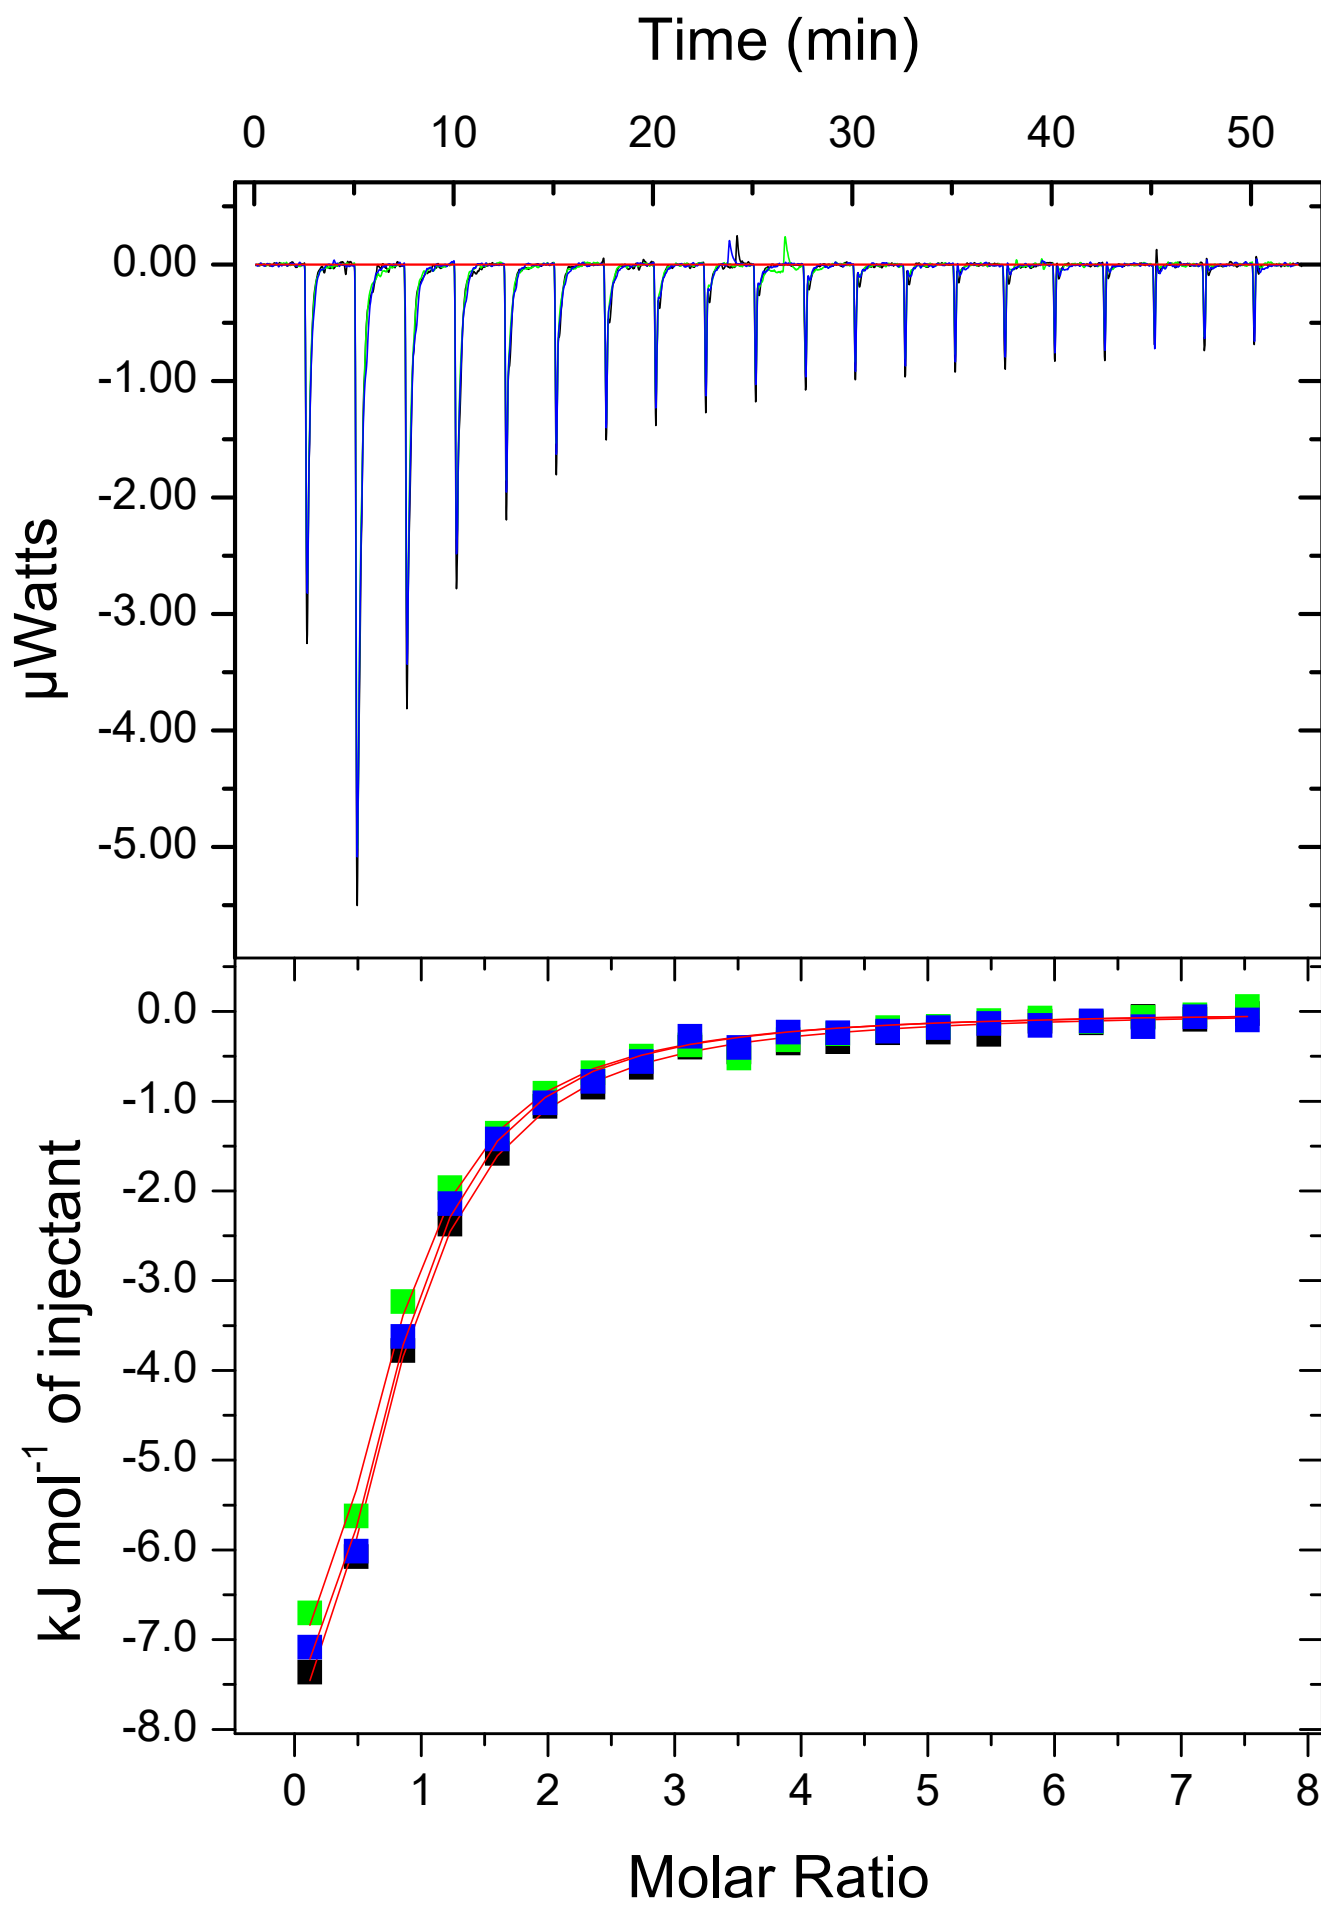

Supplement: d3cp05347d7.zip [file d3cp05347d7.zip]

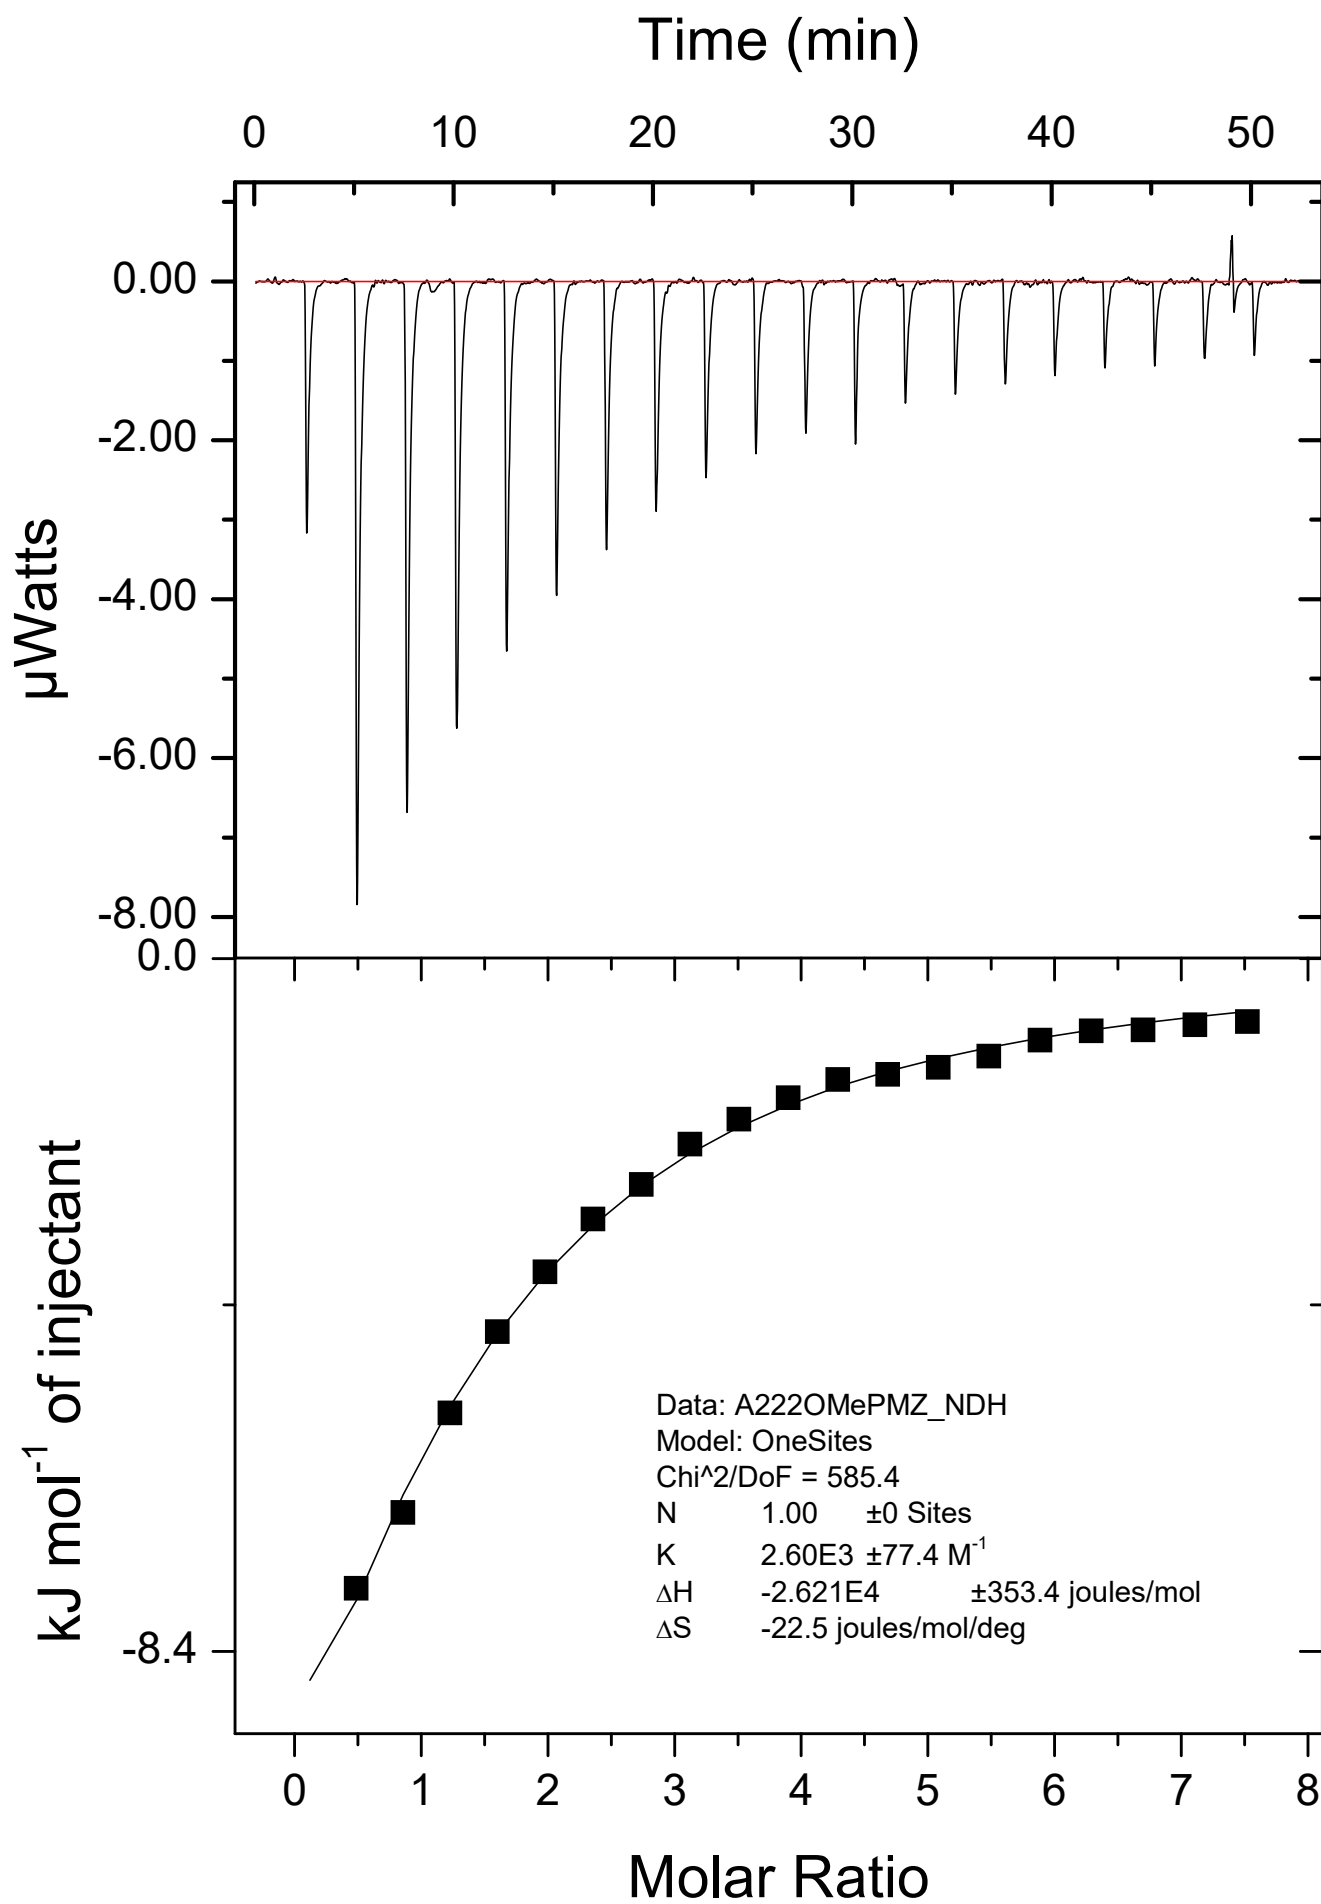

Supplement: d3cp05347d7.zip [file d3cp05347d7.zip]

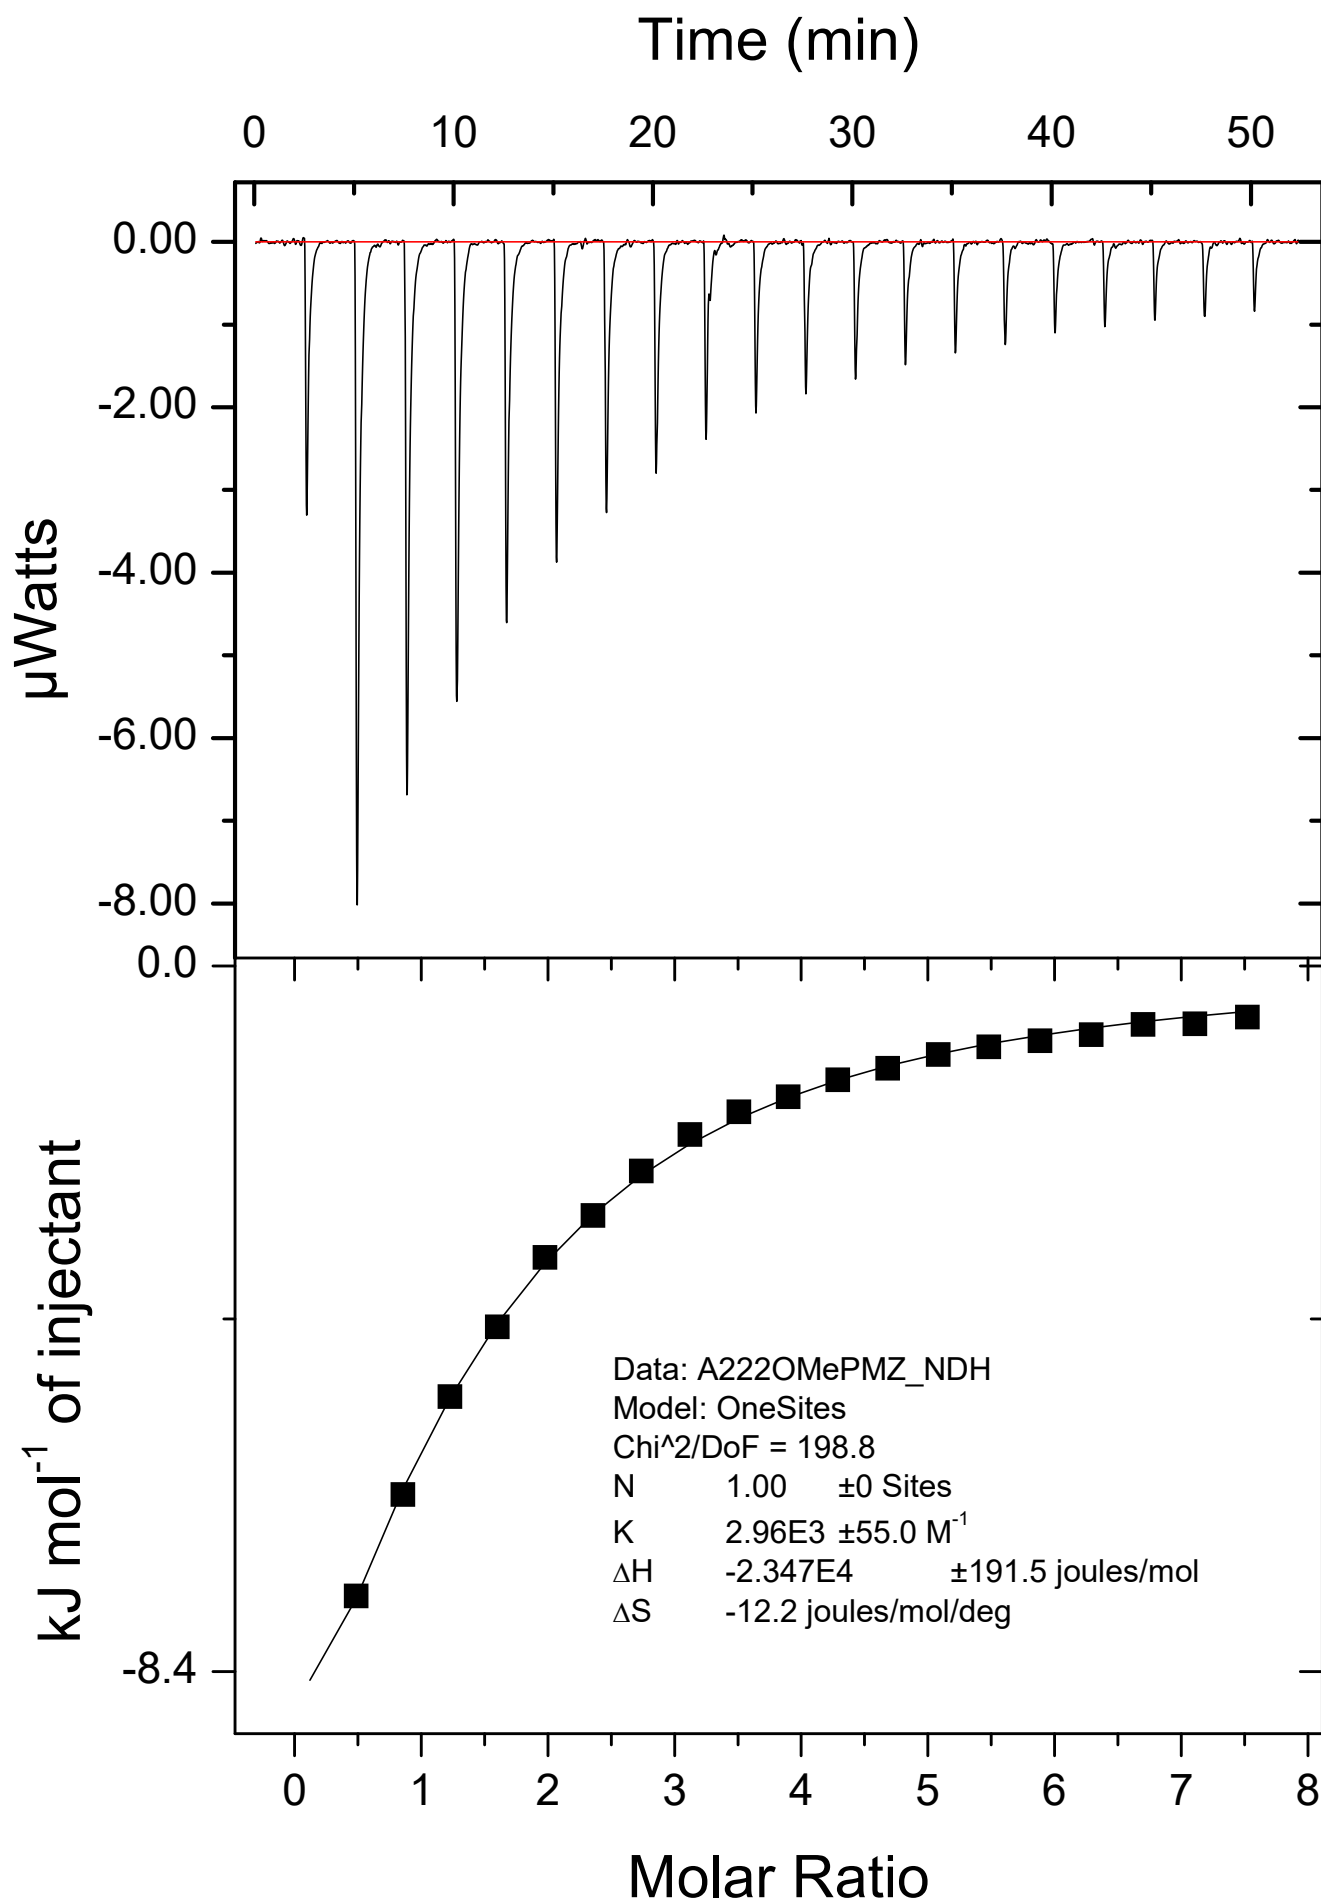

Supplement: d3cp05347d7.zip [file d3cp05347d7.zip]

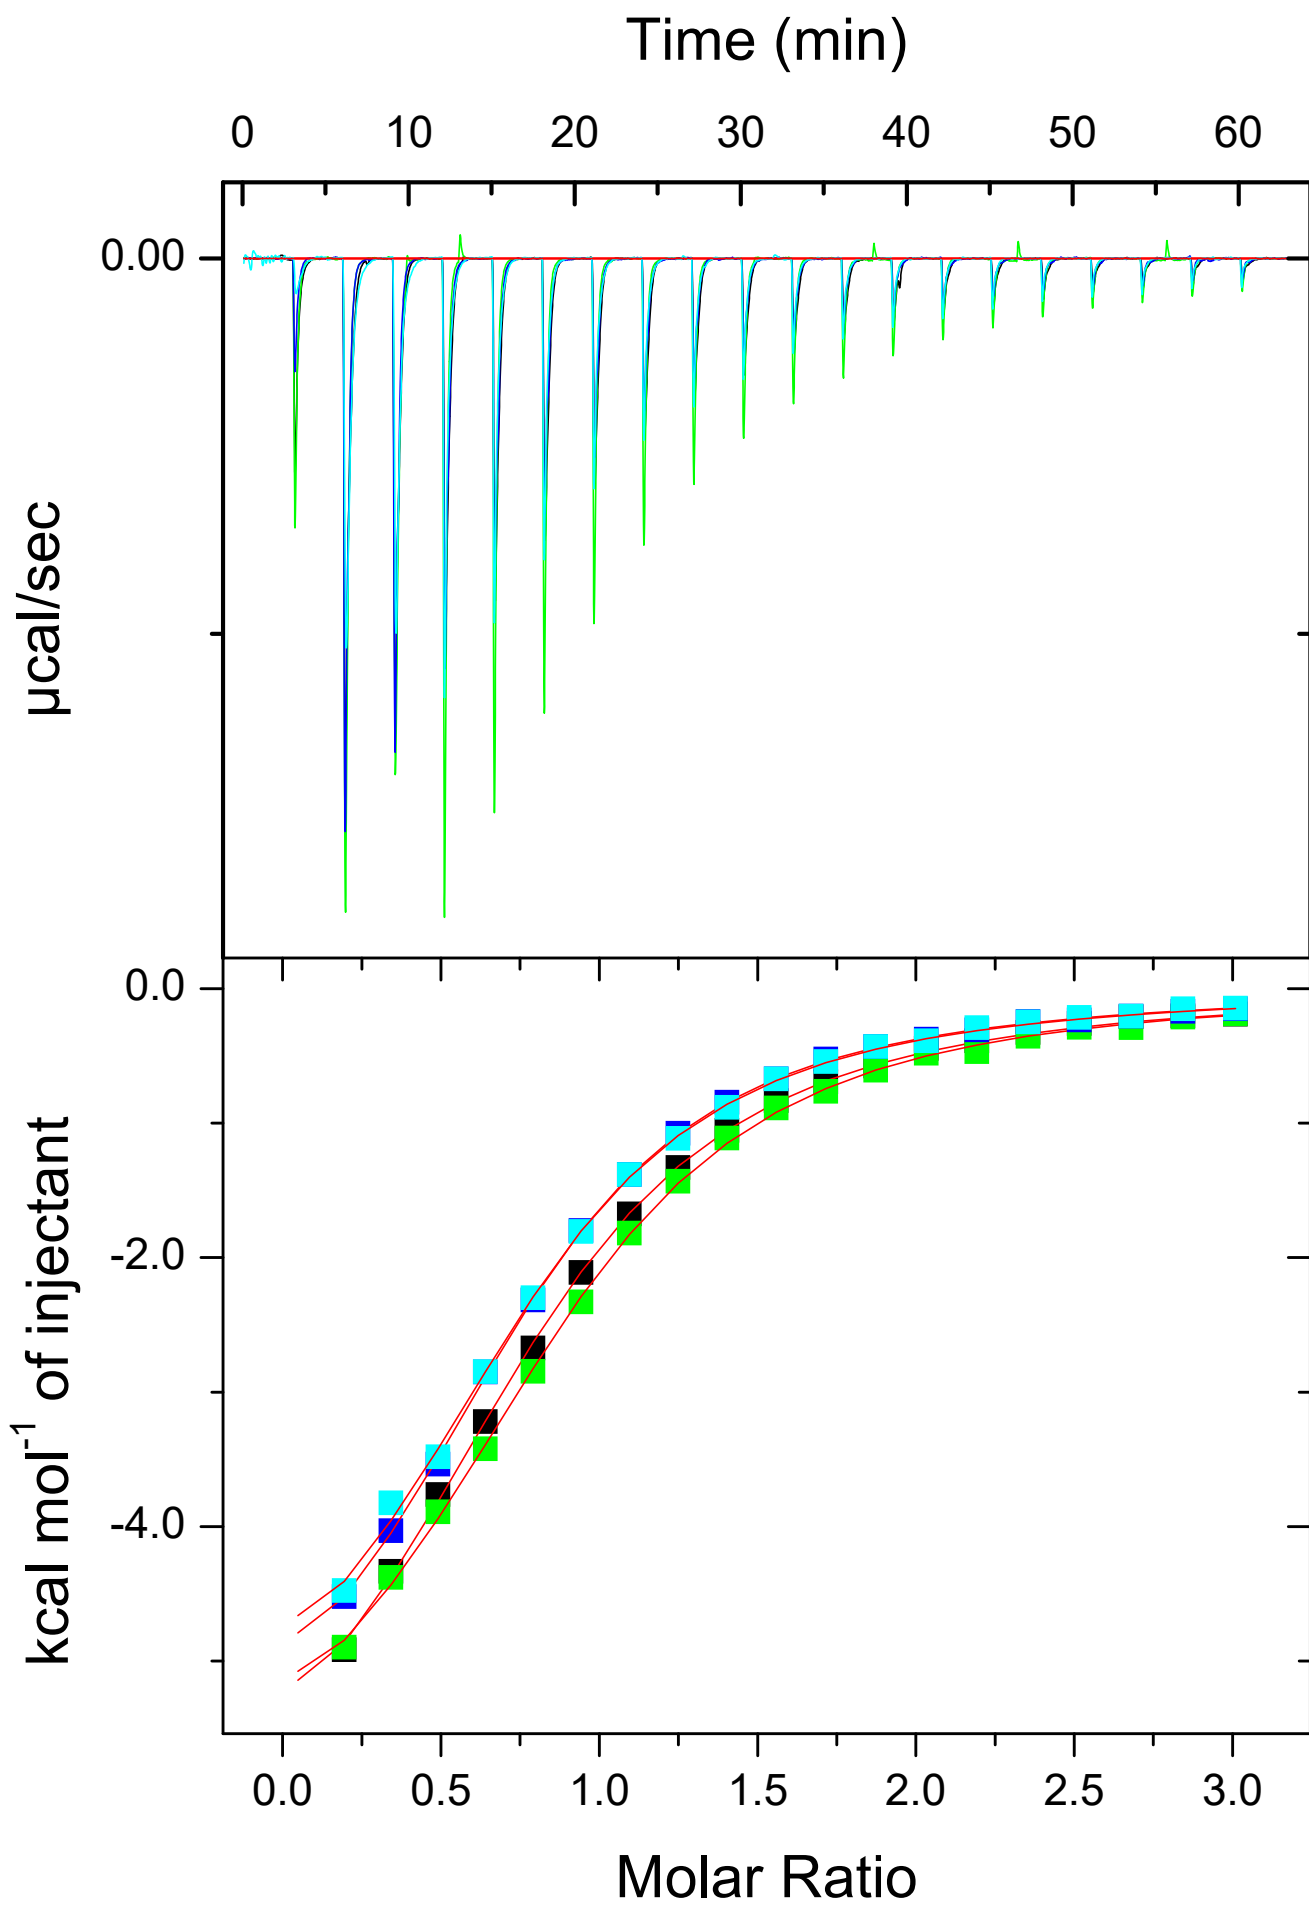

Supplement: d3cp05347d7.zip [file d3cp05347d7.zip]

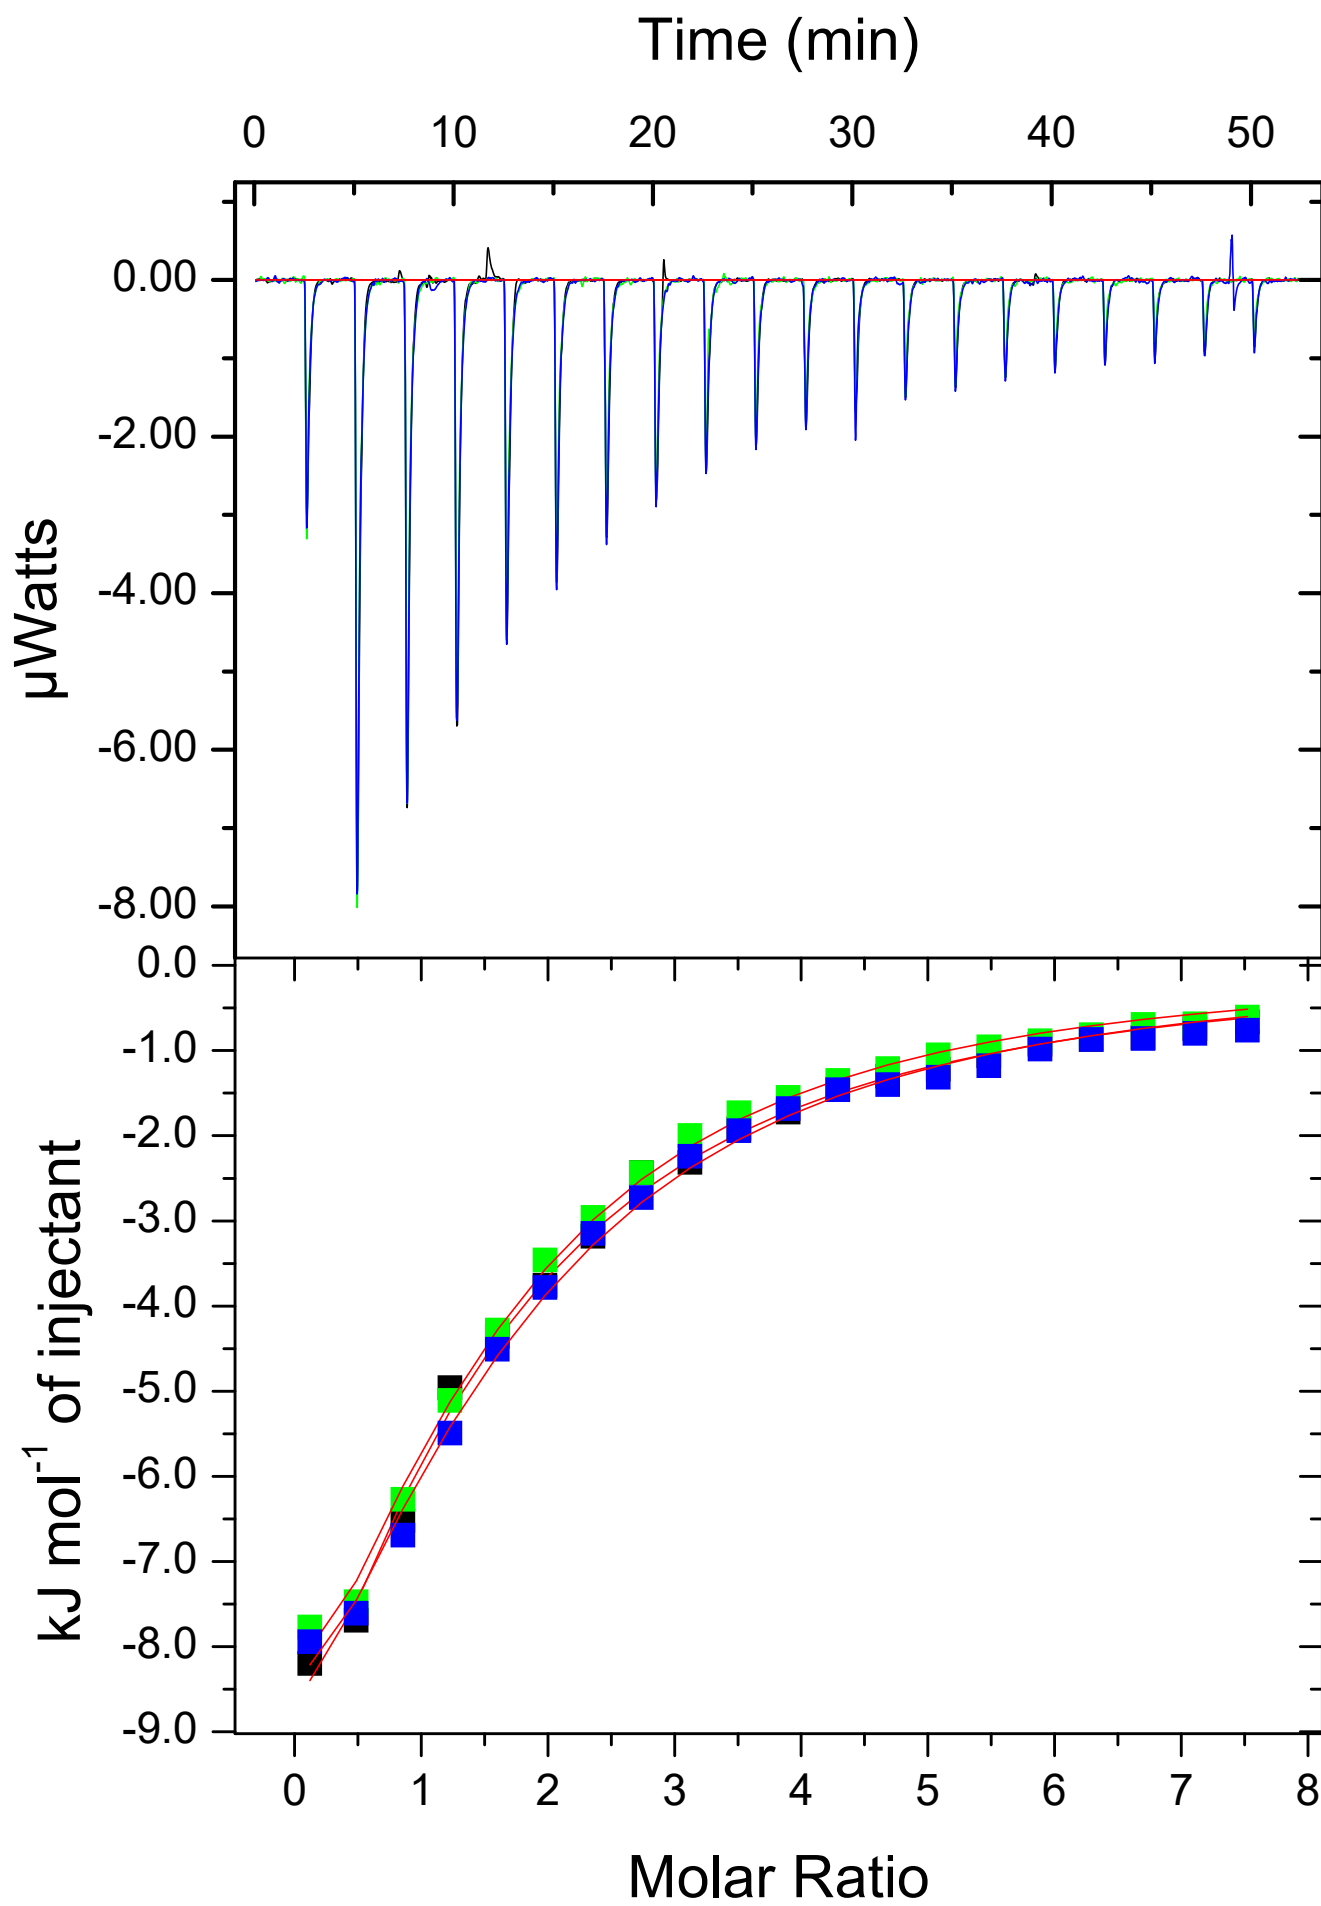

Supplement: d3cp05347d7.zip [file d3cp05347d7.zip]

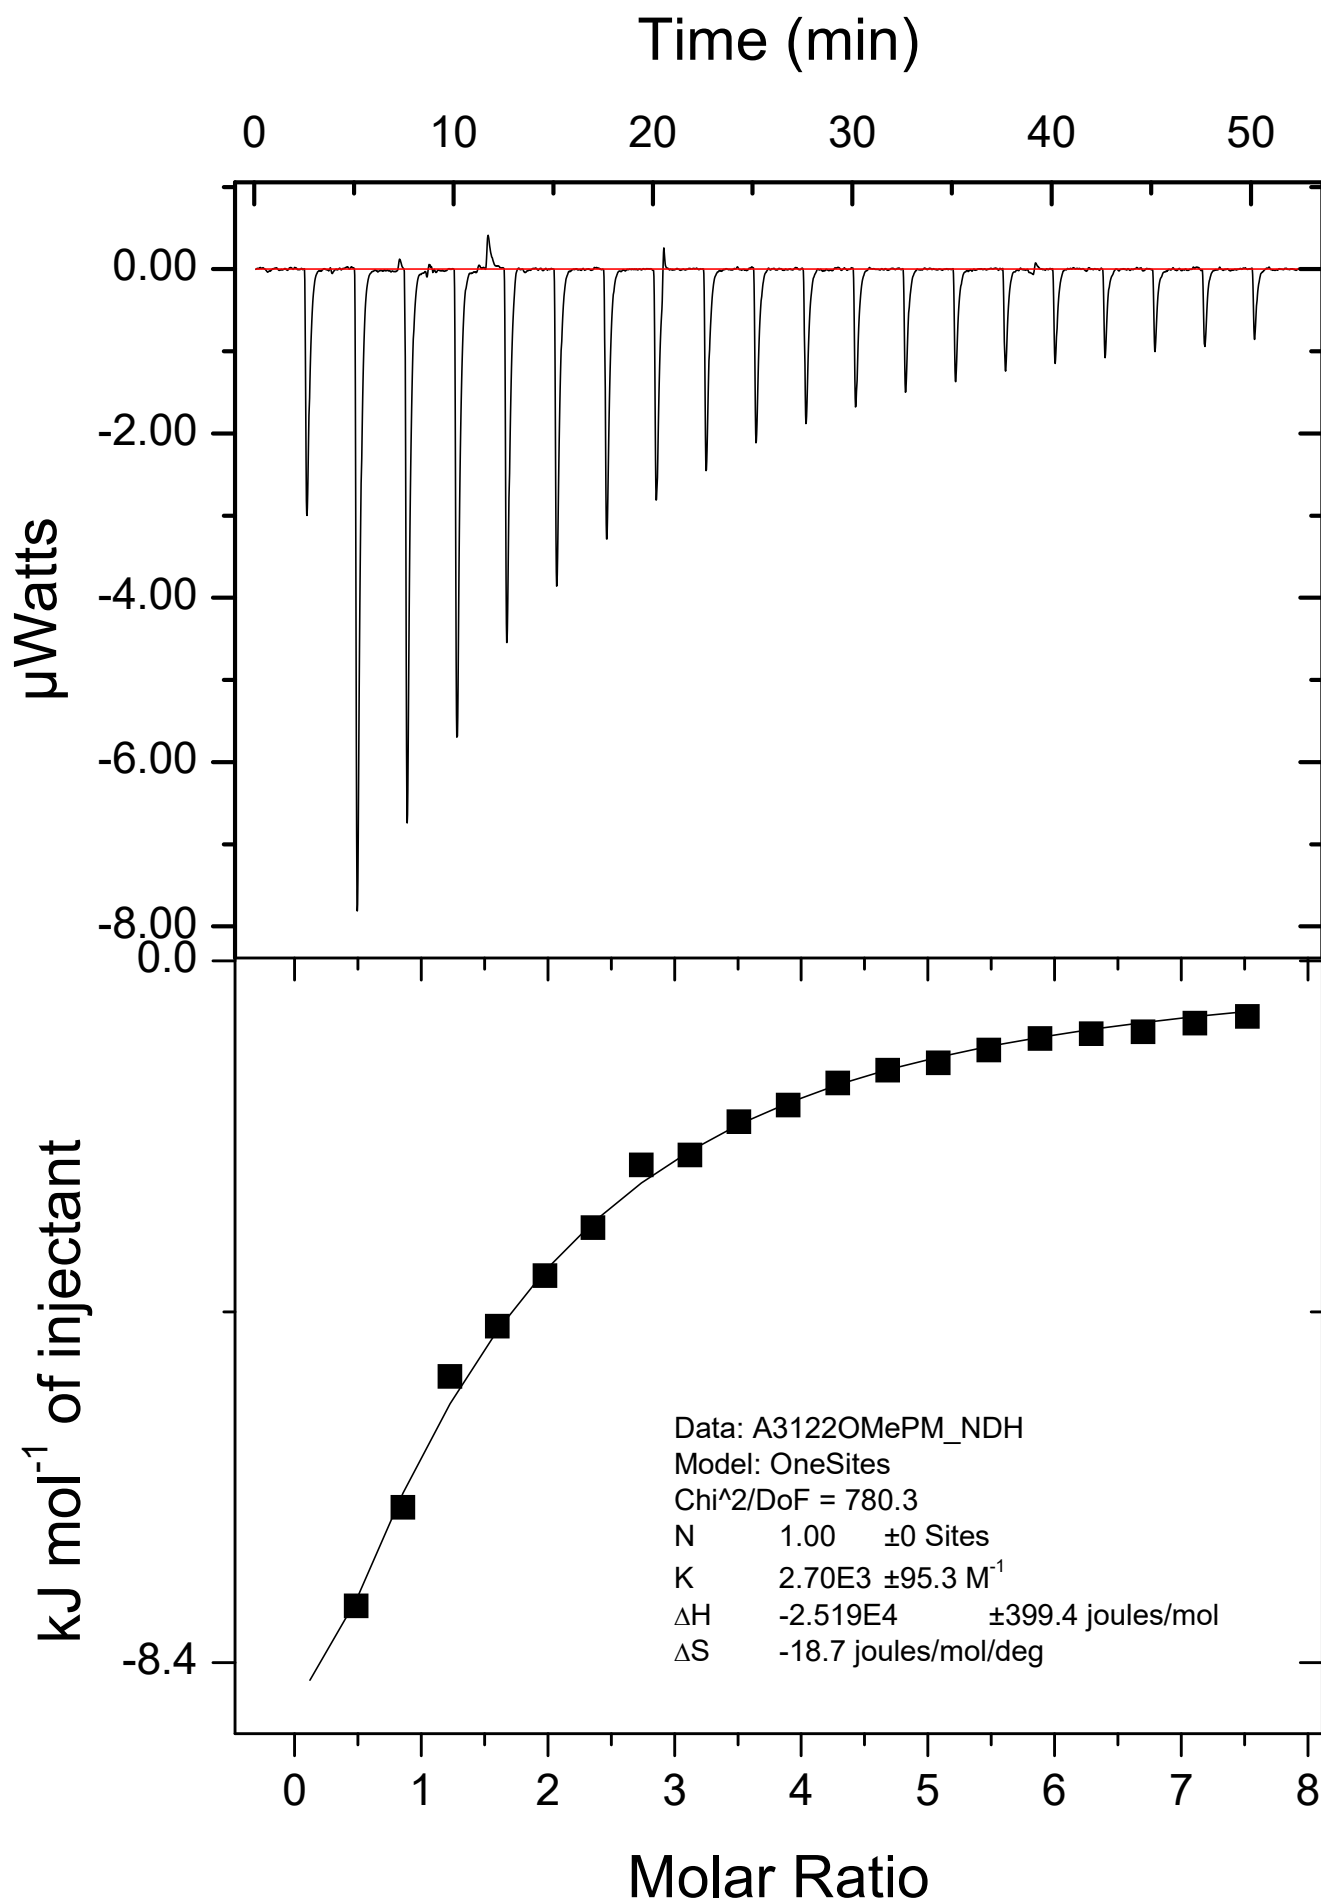

Supplement: d3cp05347d7.zip [file d3cp05347d7.zip]

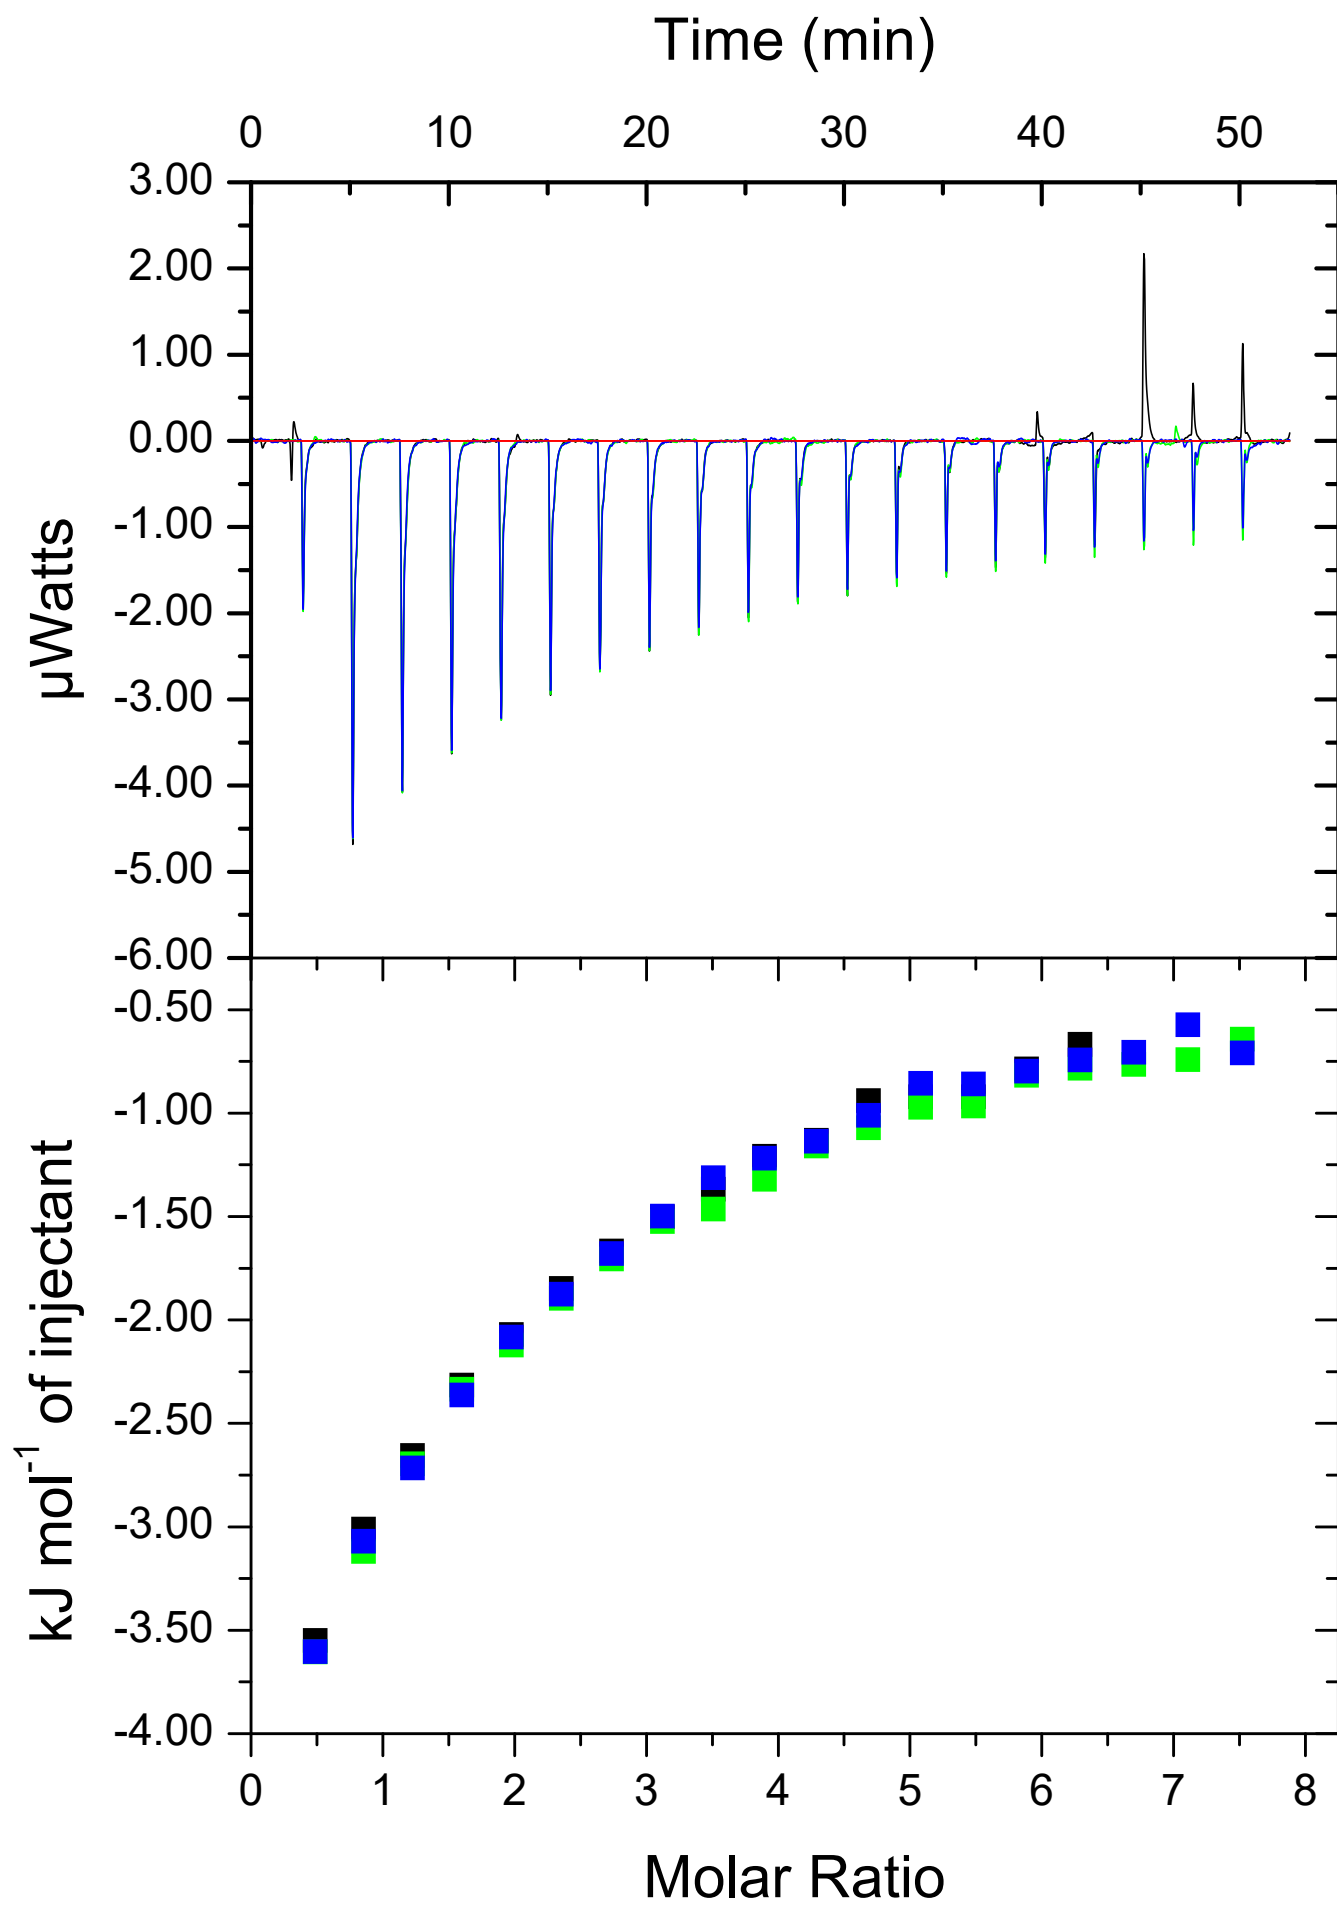

Supplement: d3cp05347d7.zip [file d3cp05347d7.zip]
